# Supplementary material
Source: bioRxiv or medRxiv preprint supplement (https://www.biorxiv.org/highwire/filestream/23330/field_highwire_adjunct_files/3/083931-12.pdf)

Figure S12.1

Both species

Split reads and trio assembly

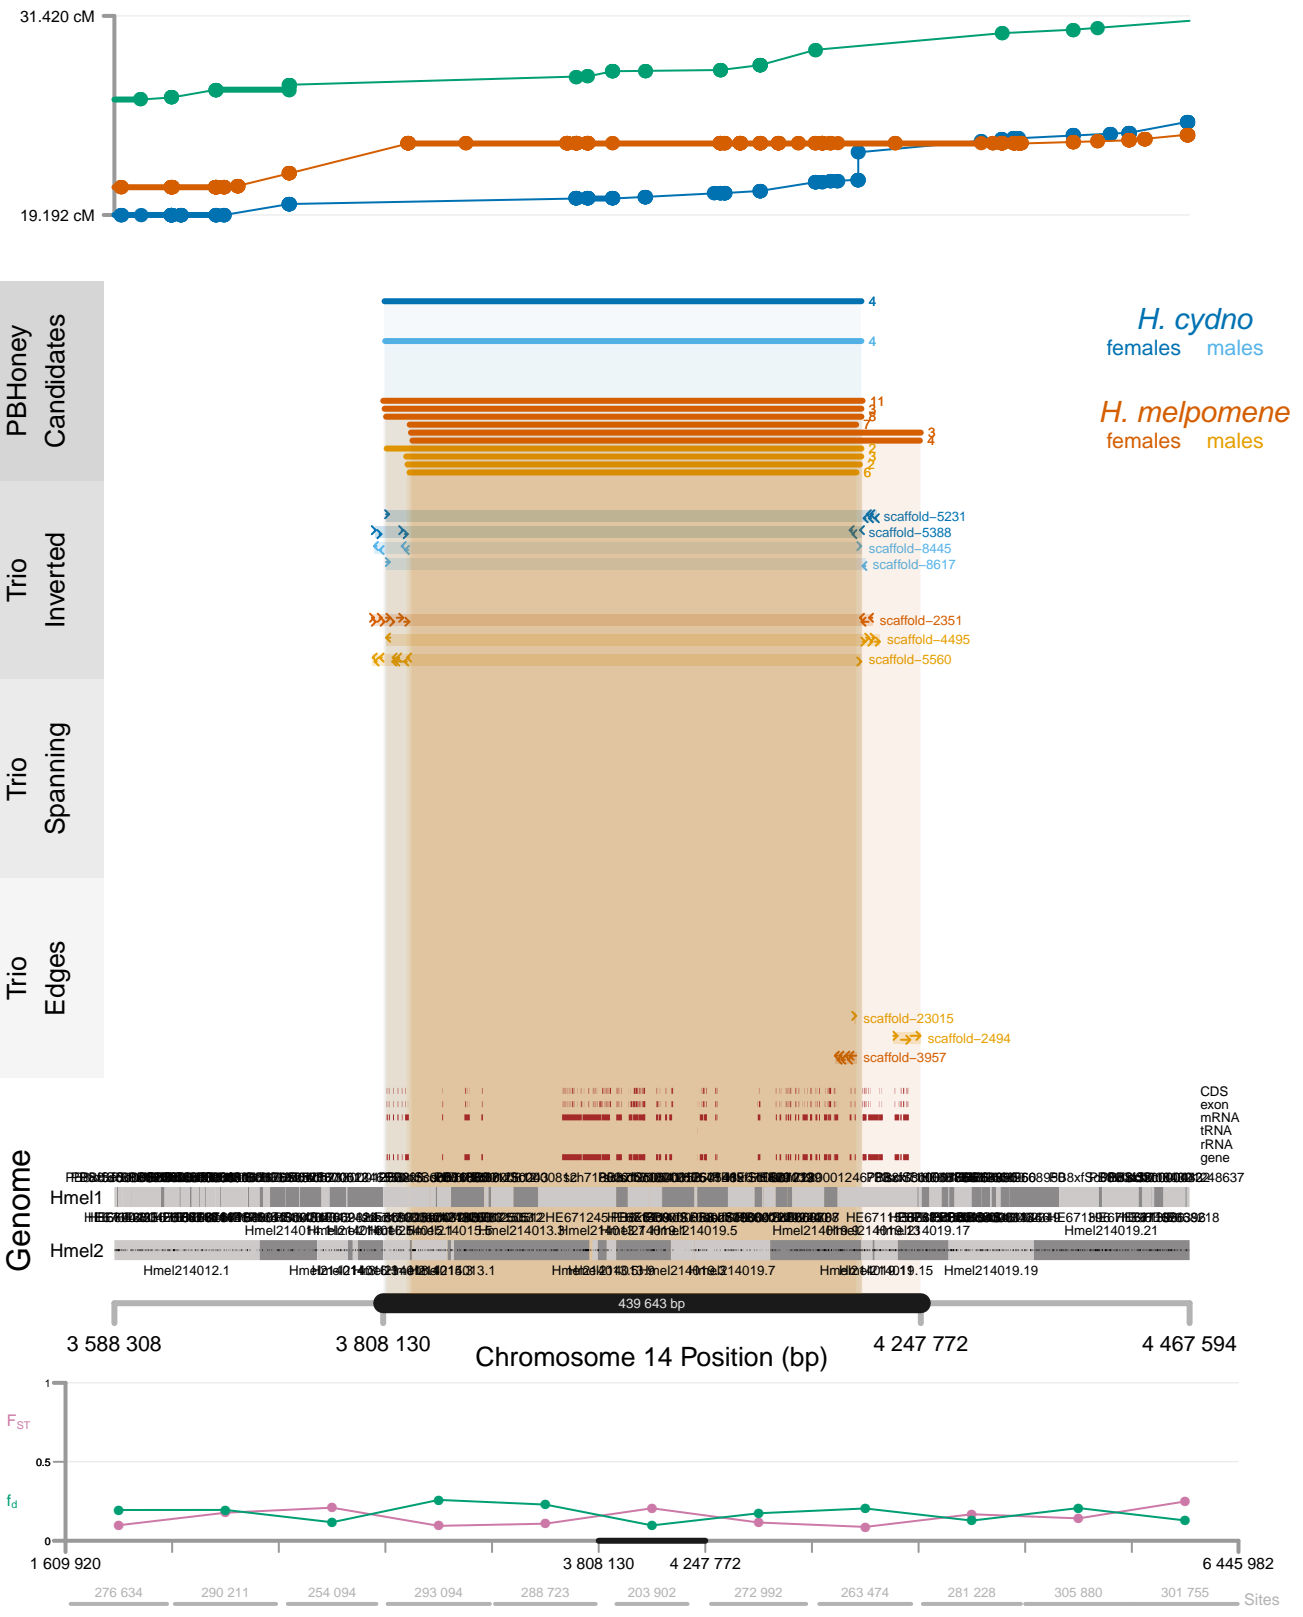



Figure S12.3

Both species

Split reads and trio assembly

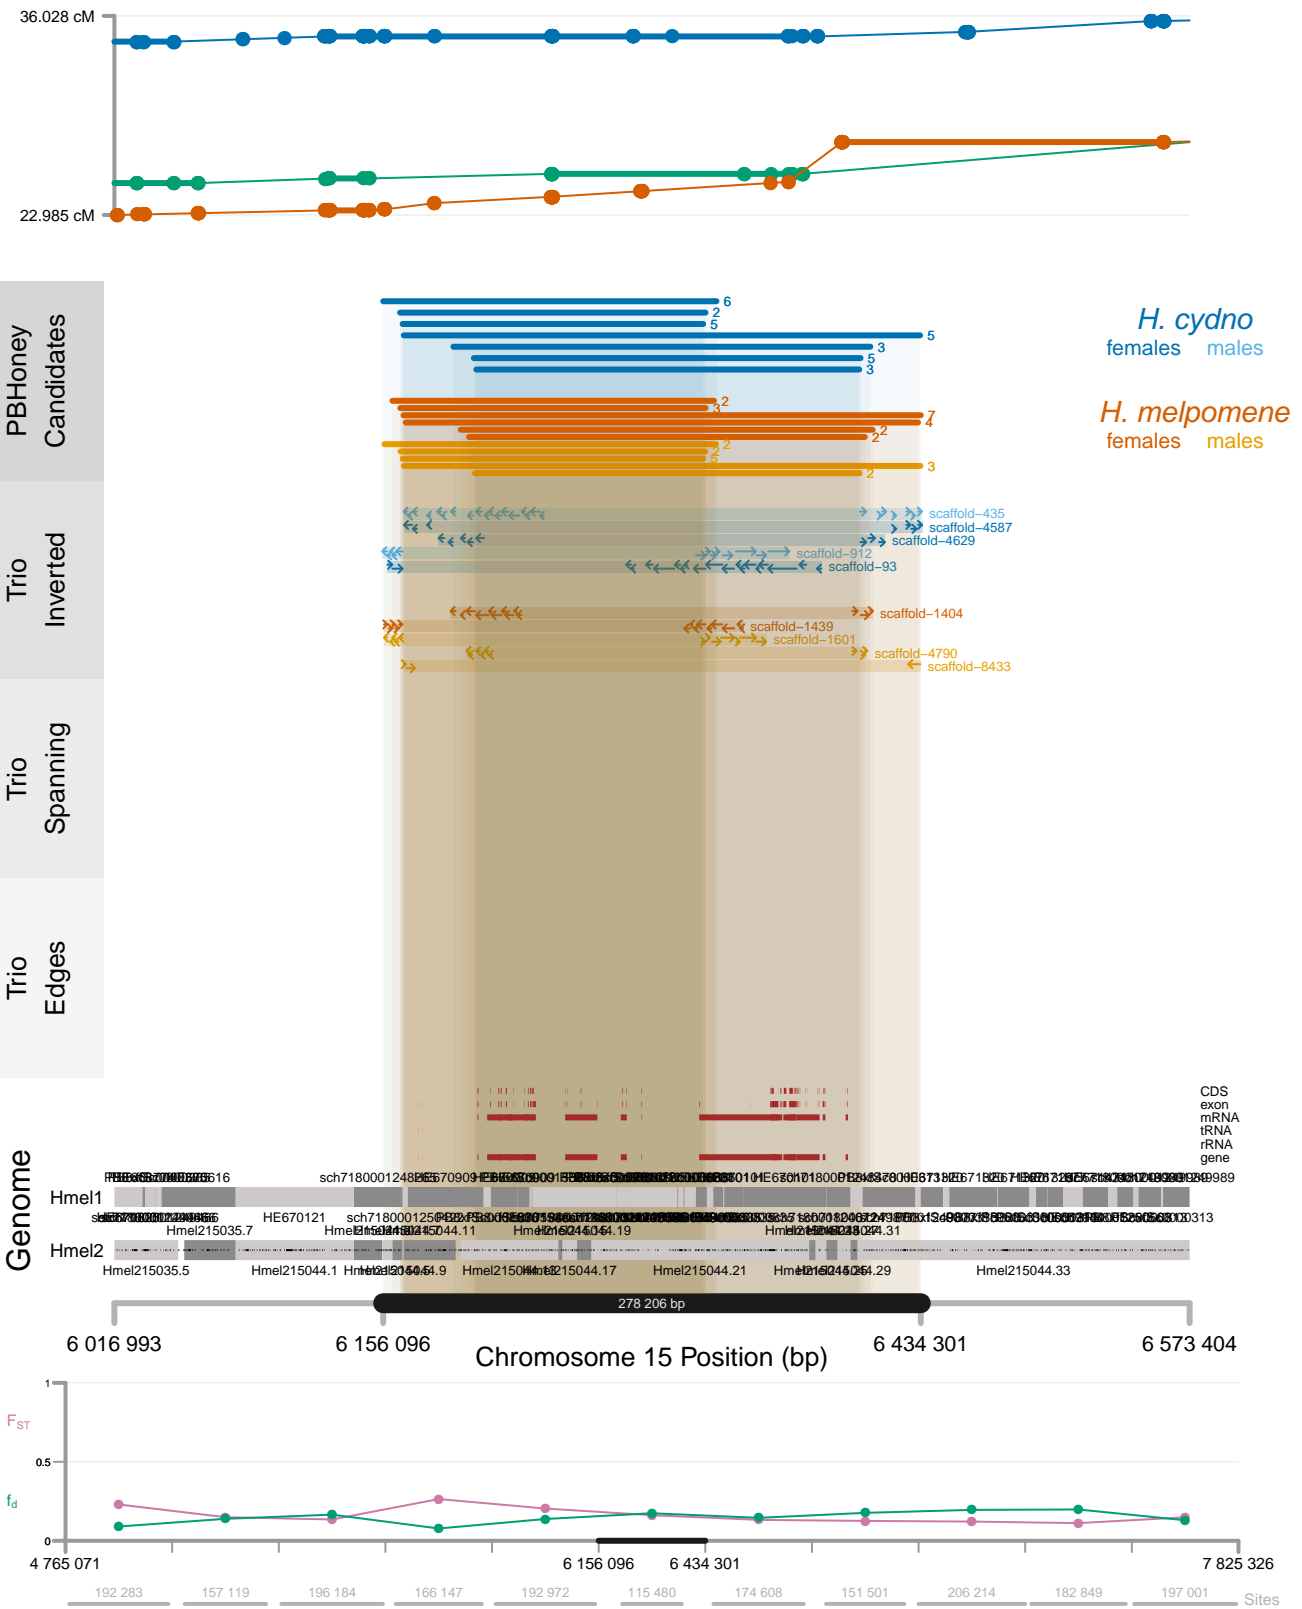

PBHoney Candidates

Trio Inverted

Trio Spanning

Trio Edges

*H. cydno*  
females males

*H. melpomene*  
females males

CDS

exon

mRNA

tRNA

rRNA

gene

Genome

Chromosome 15 Position (bp)

$F_{ST}$

$f_d$

Sites





Figure S12.6

Both species

Split reads and trio assembly

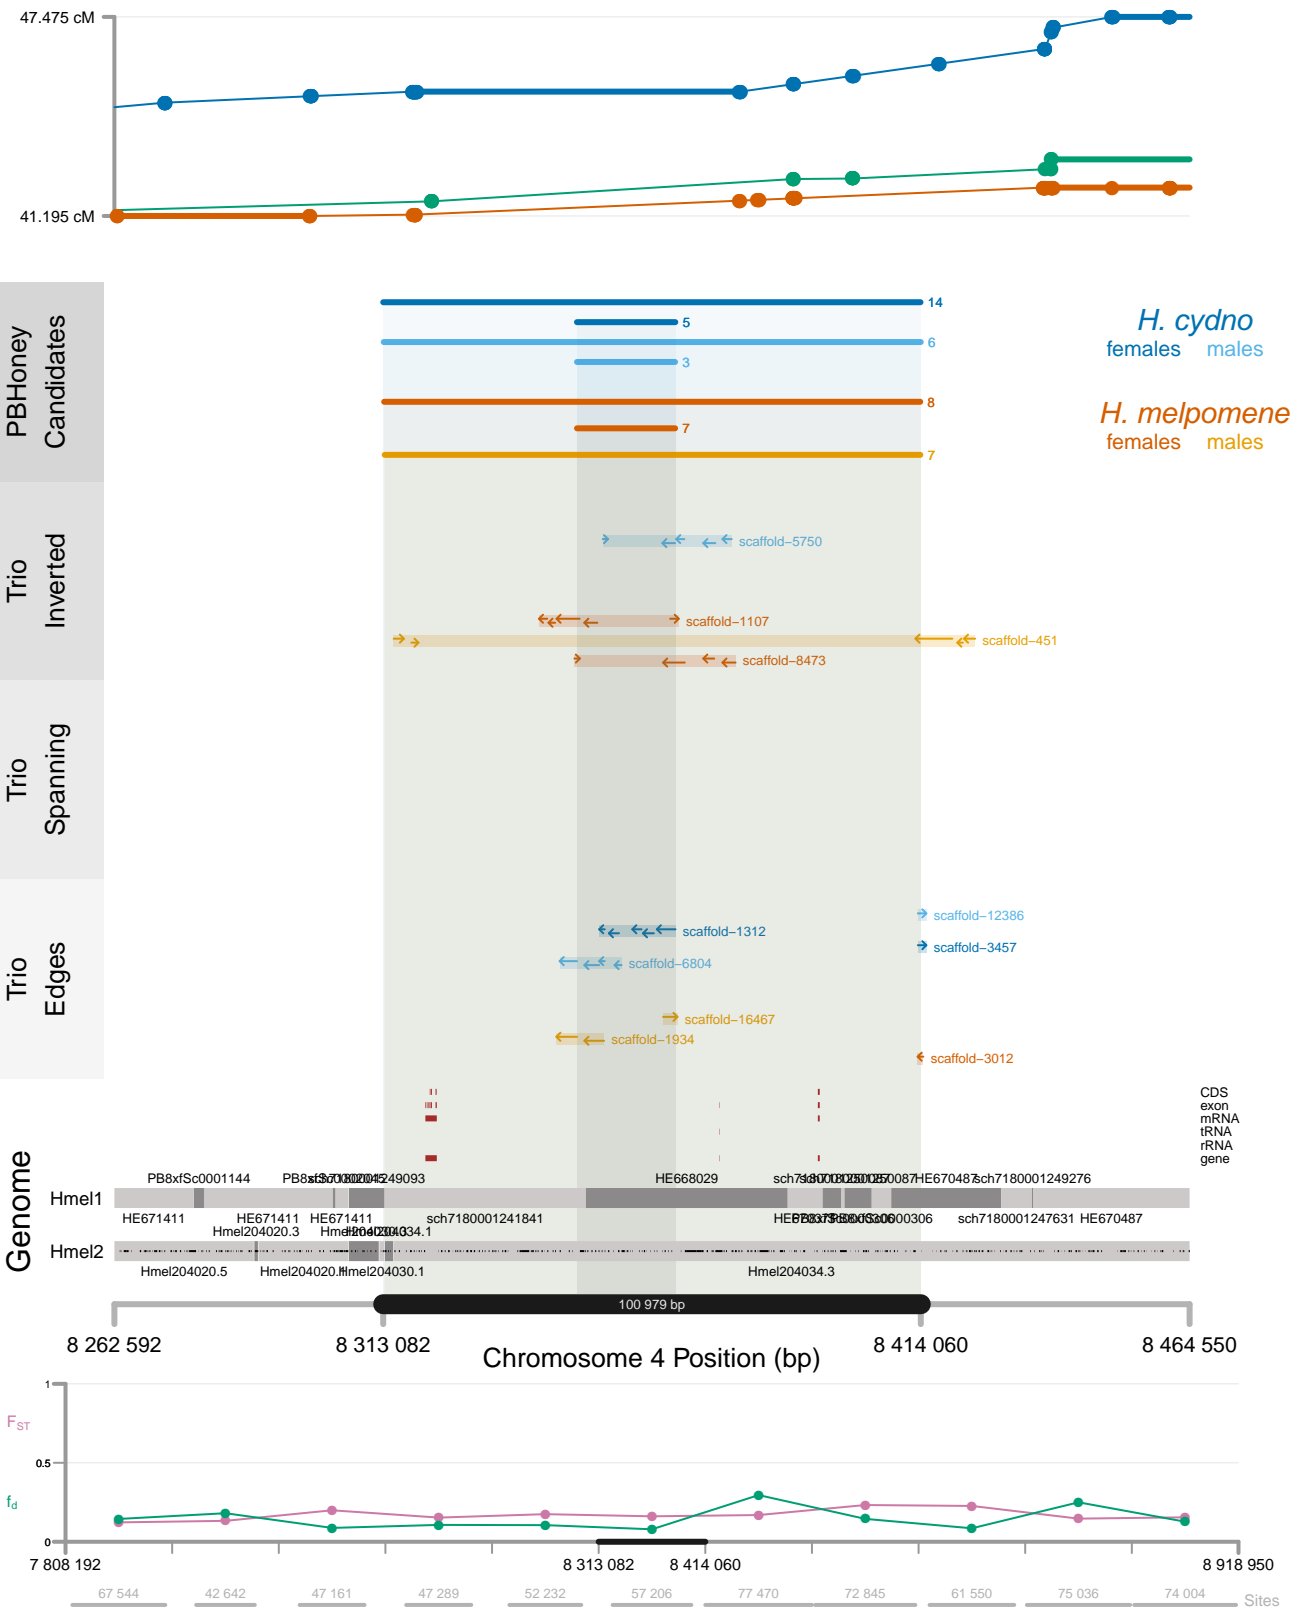

Figure S12.7

Both species

Split reads and trio assembly

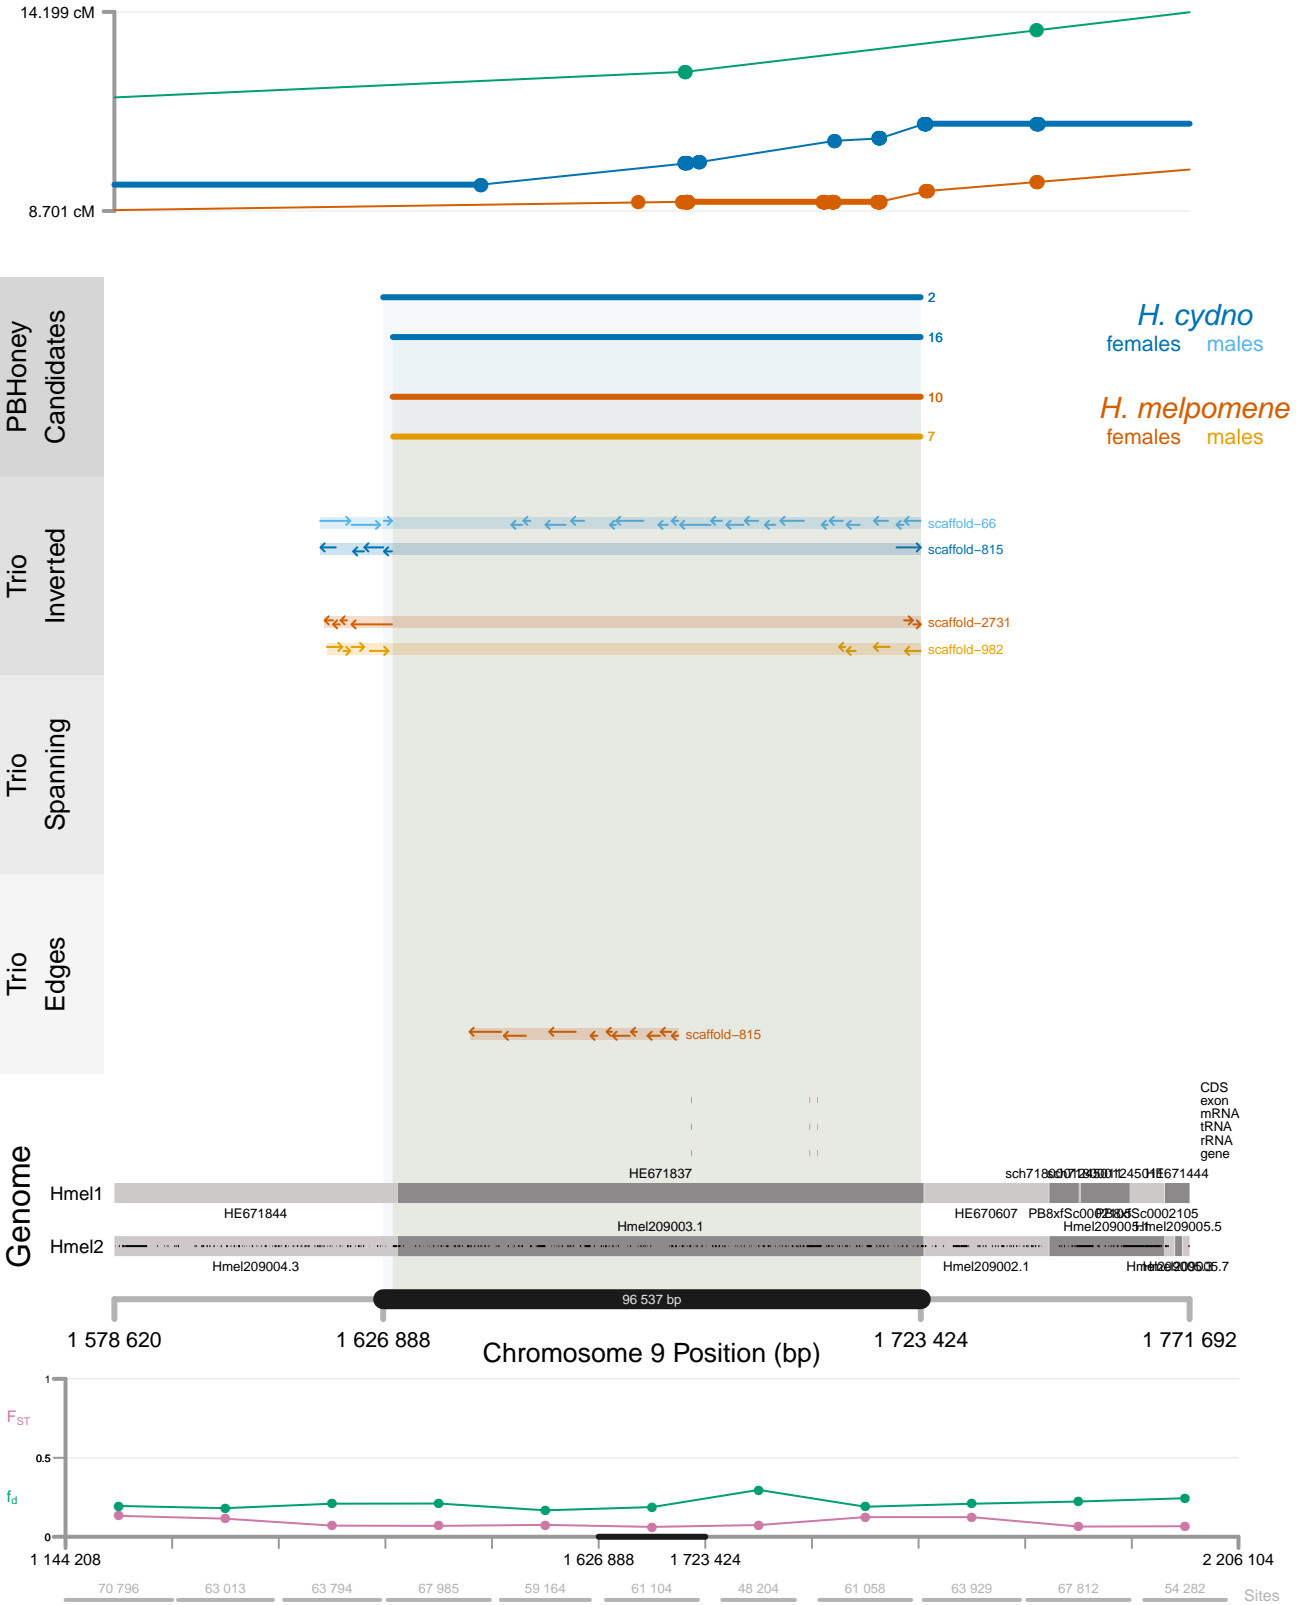

Figure S12.8

Both species

Split reads and trio assembly

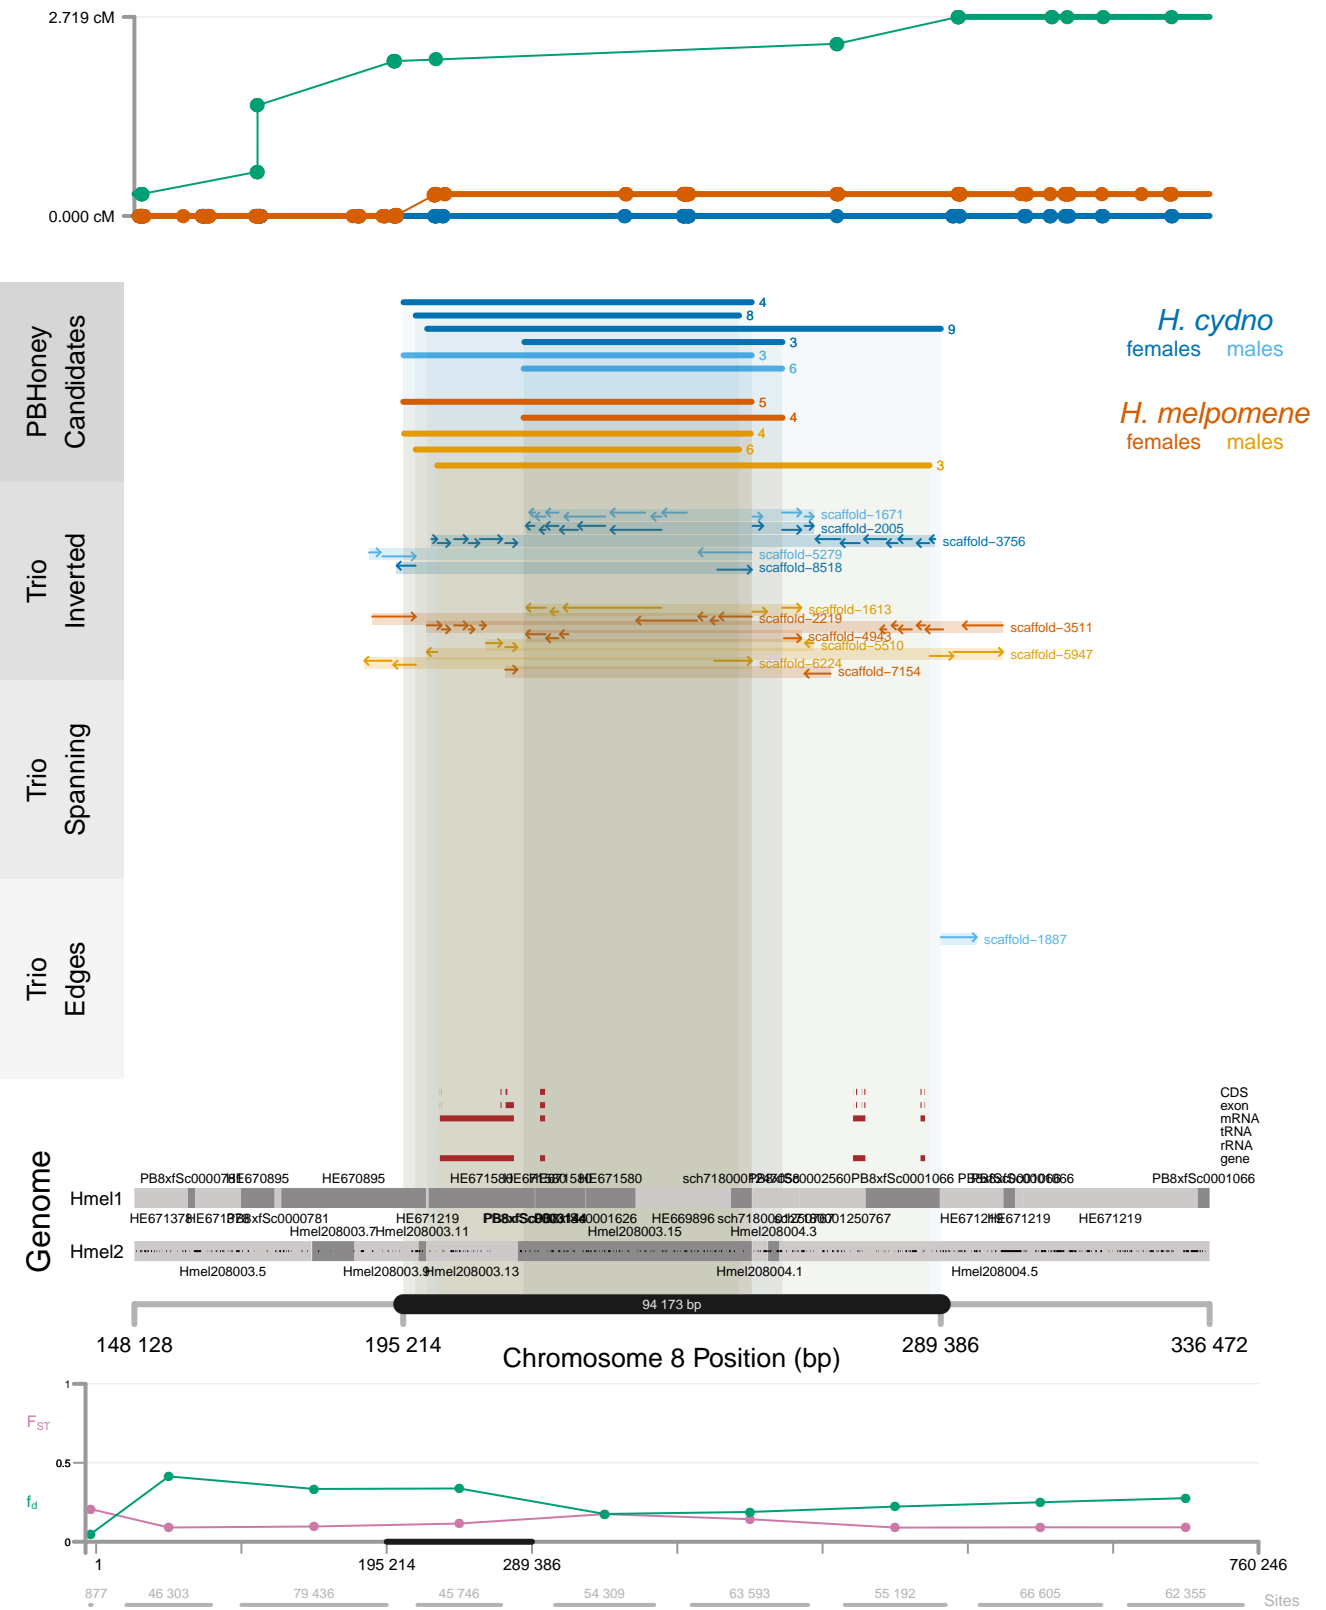



Figure S12.9

Both species

Split reads and trio assembly

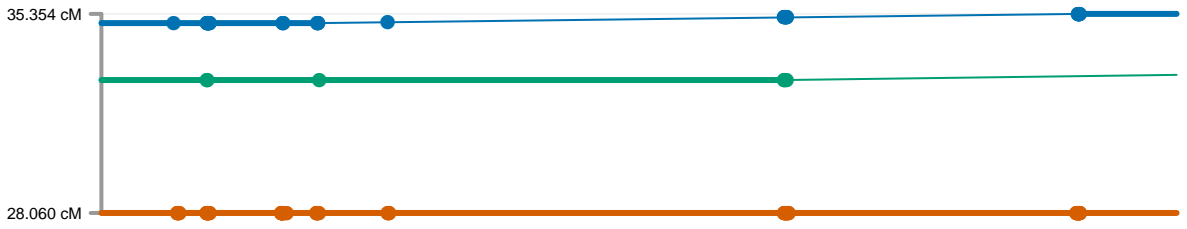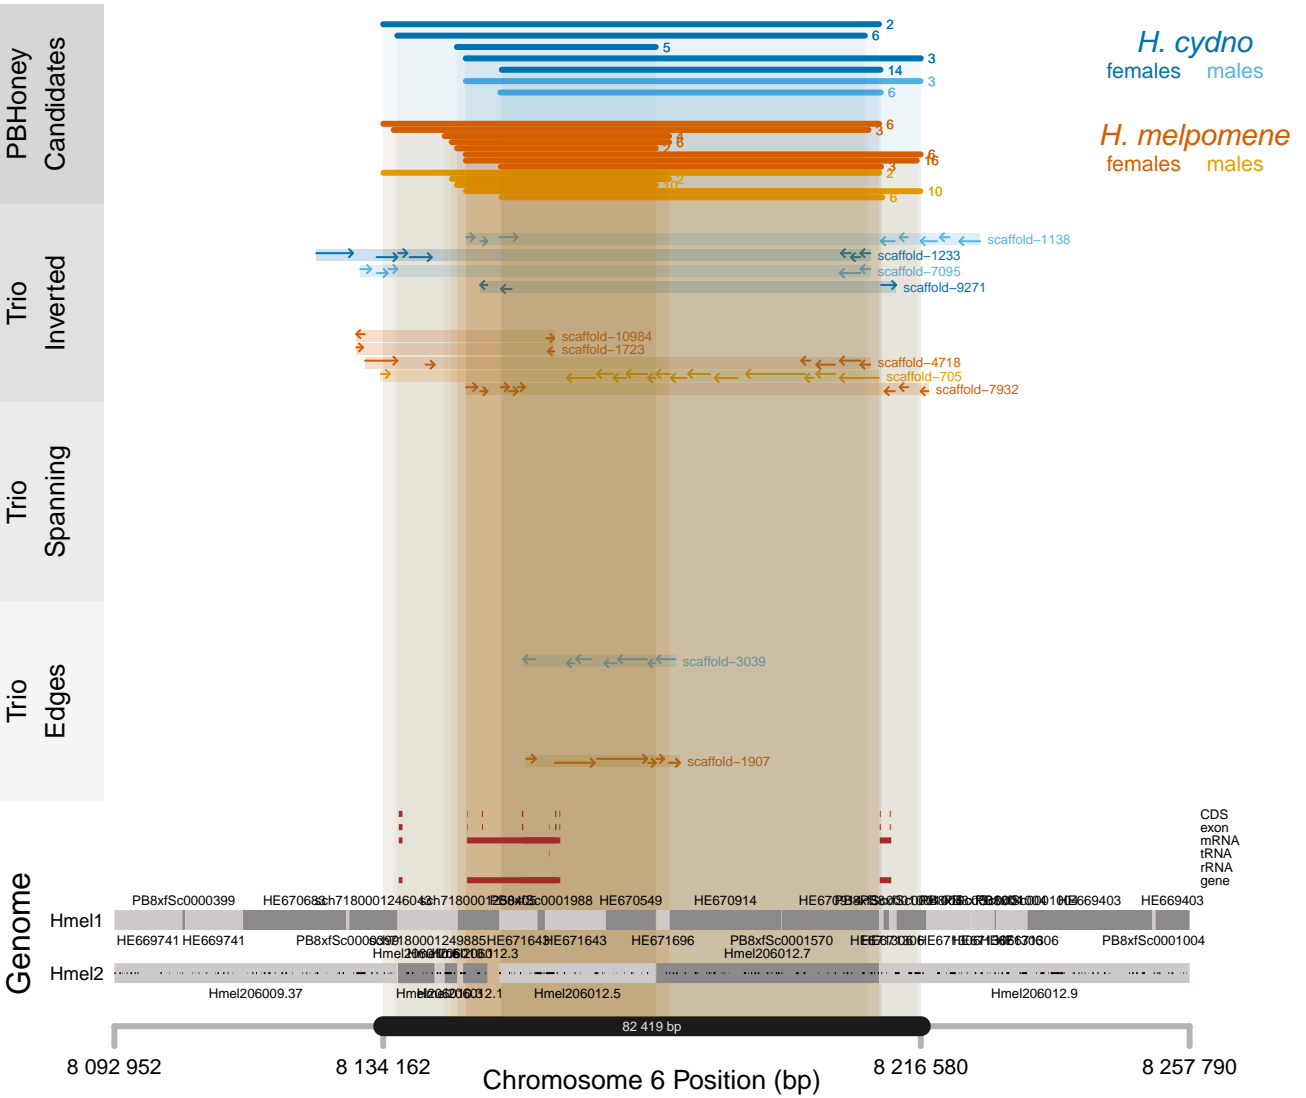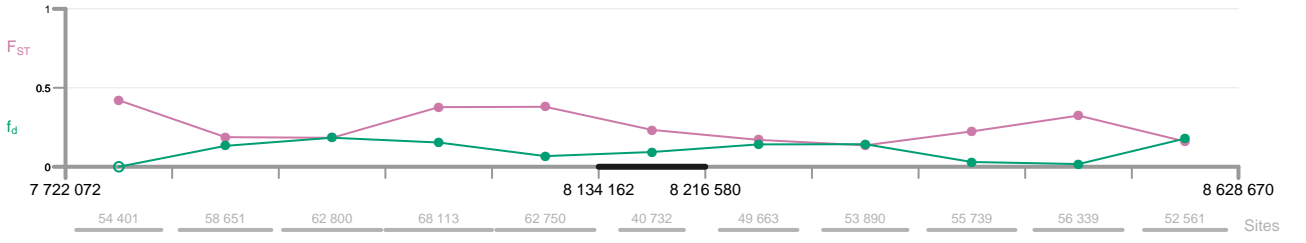



Figure S12.11

Both species

Split reads and trio assembly

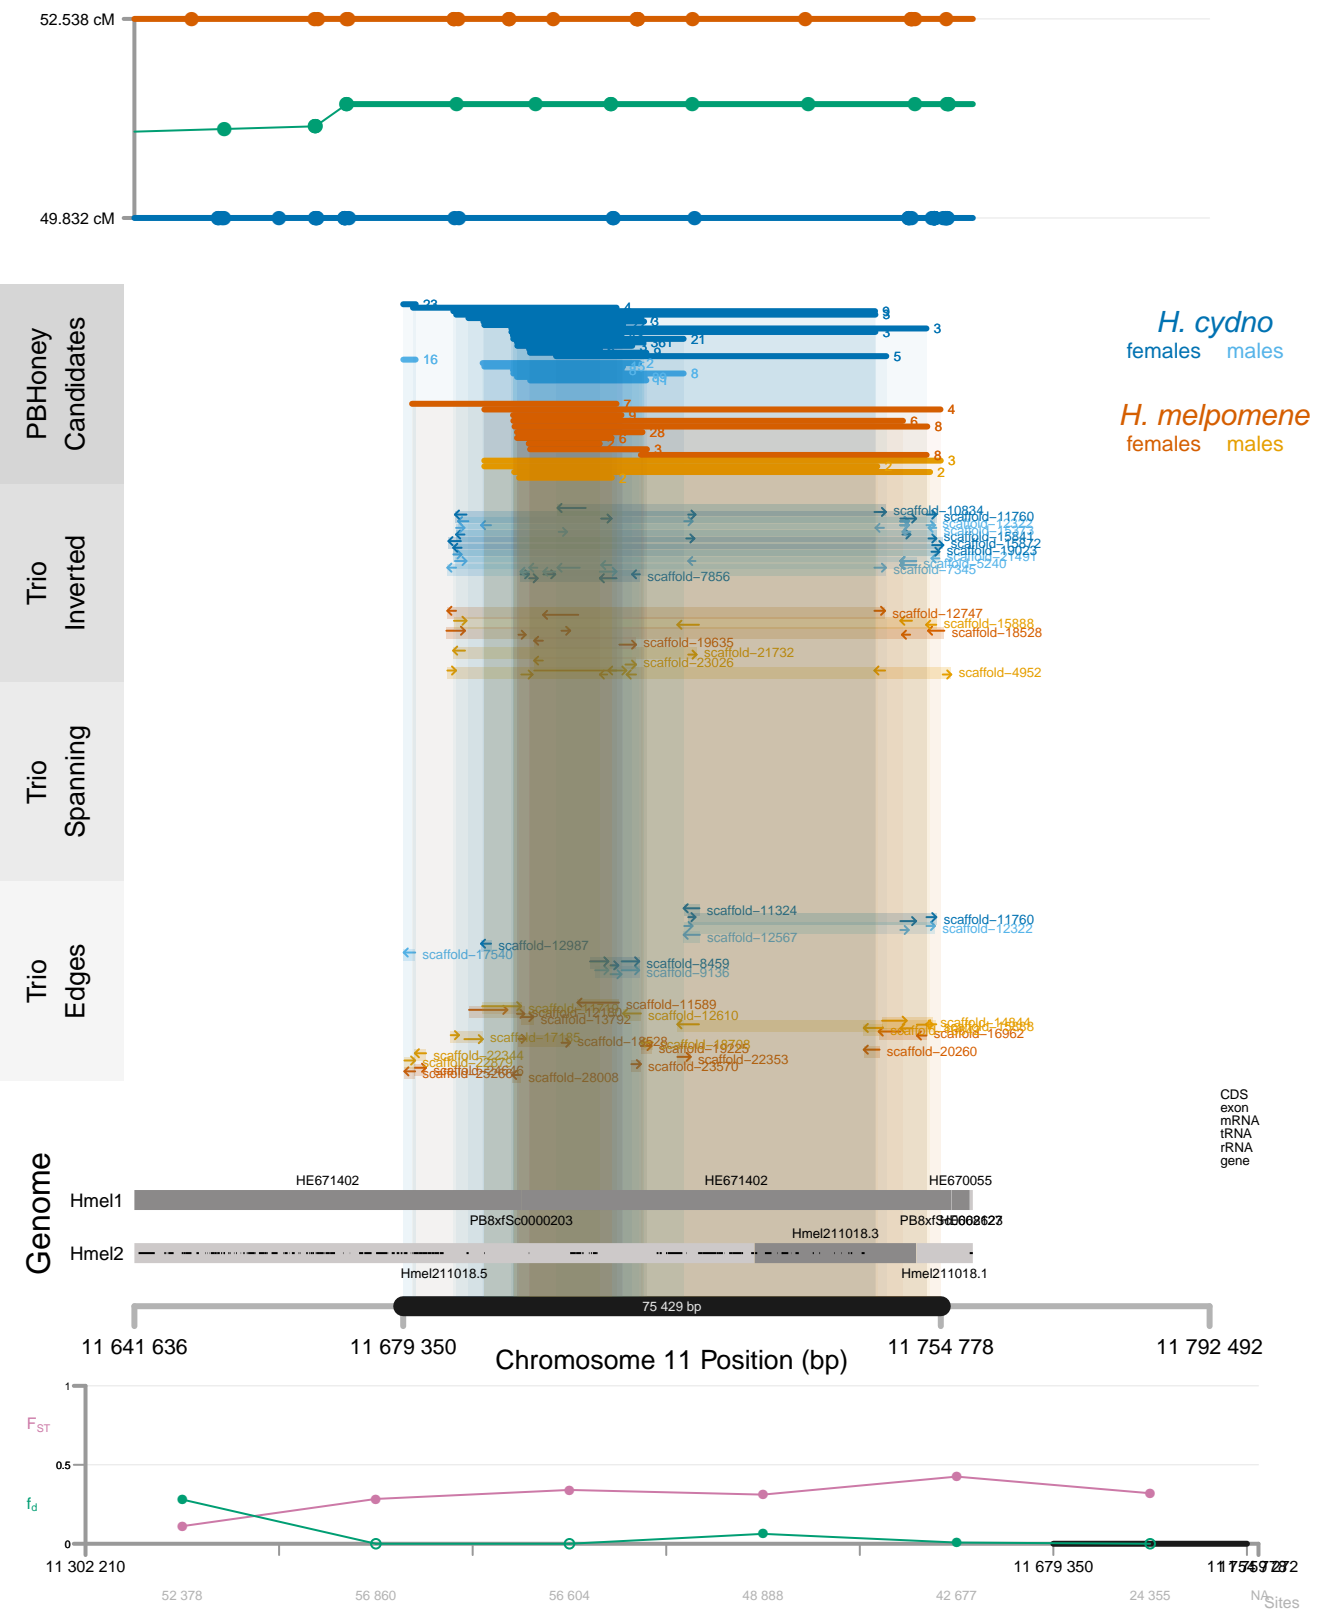

Figure S12.12

Both species

Split reads and trio assembly

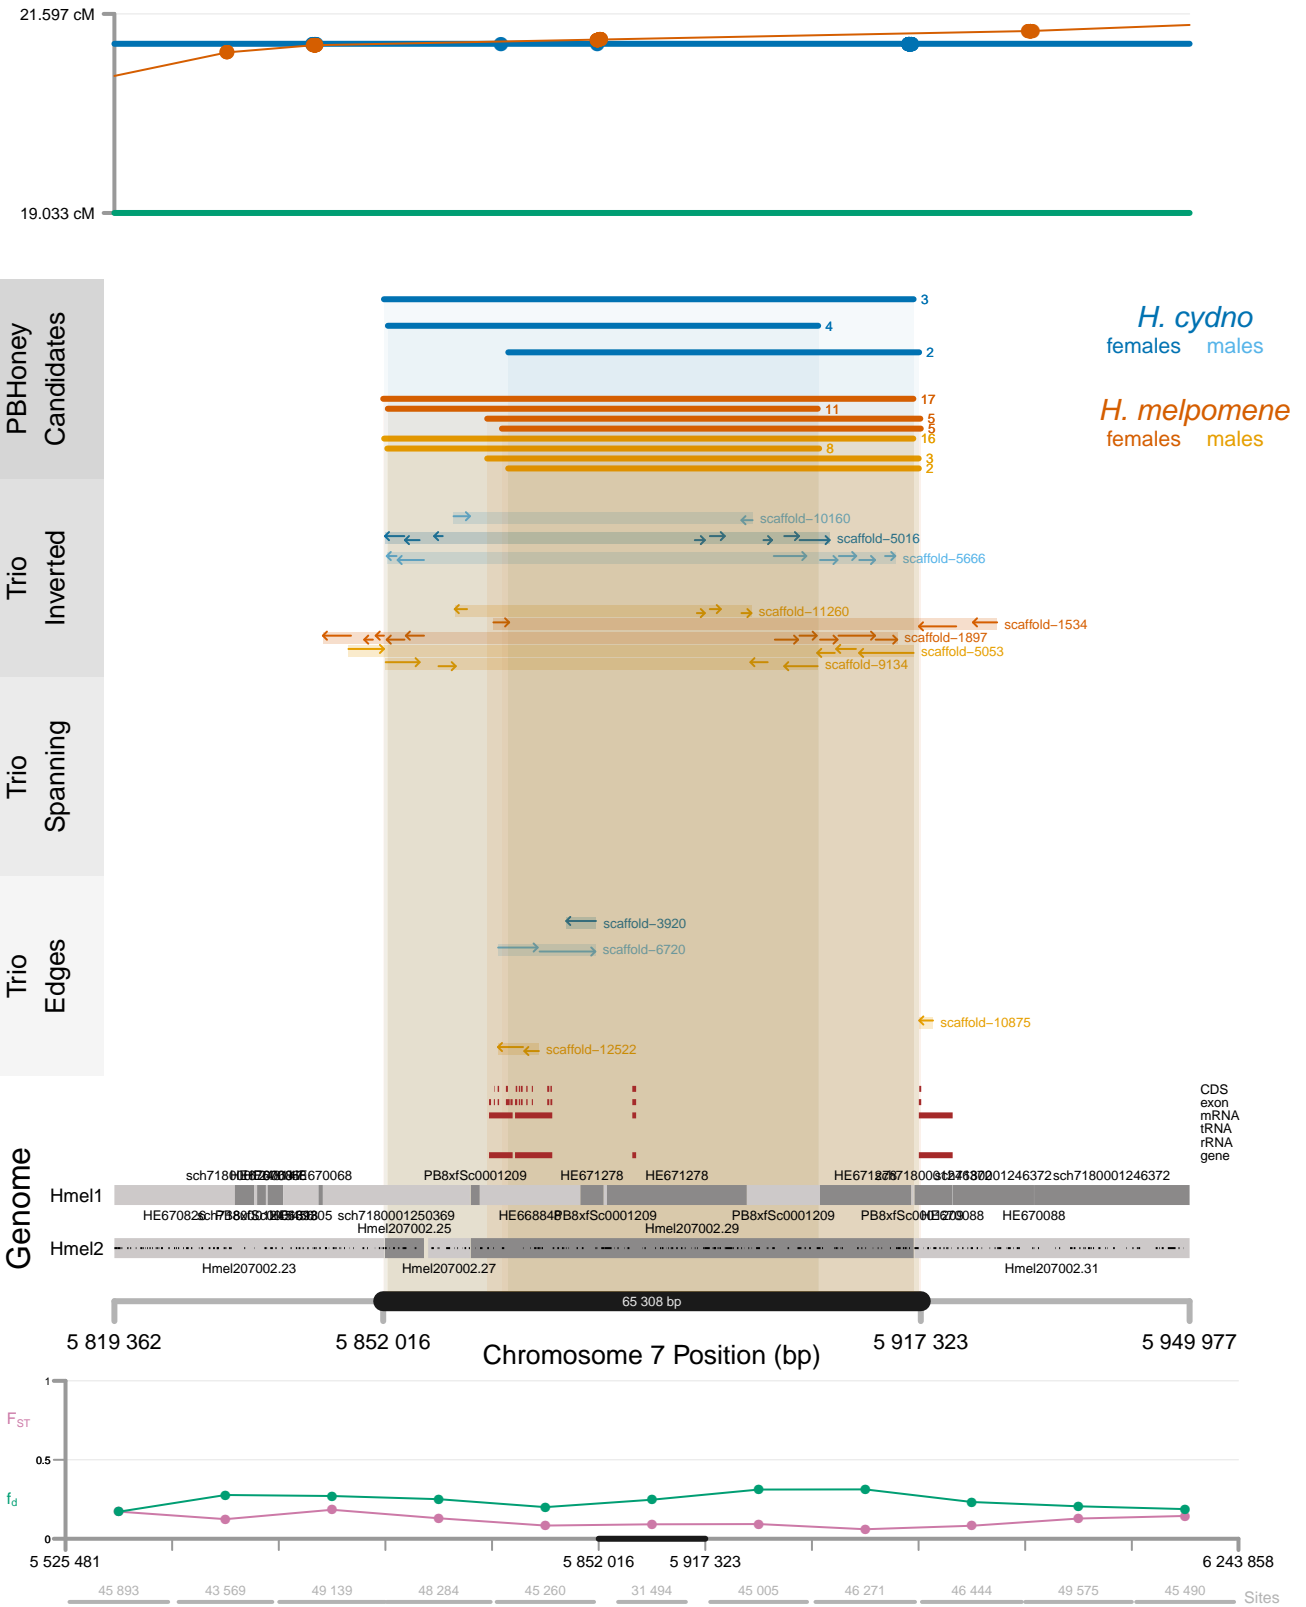

Figure S12.13

Both species

Split reads and trio assembly

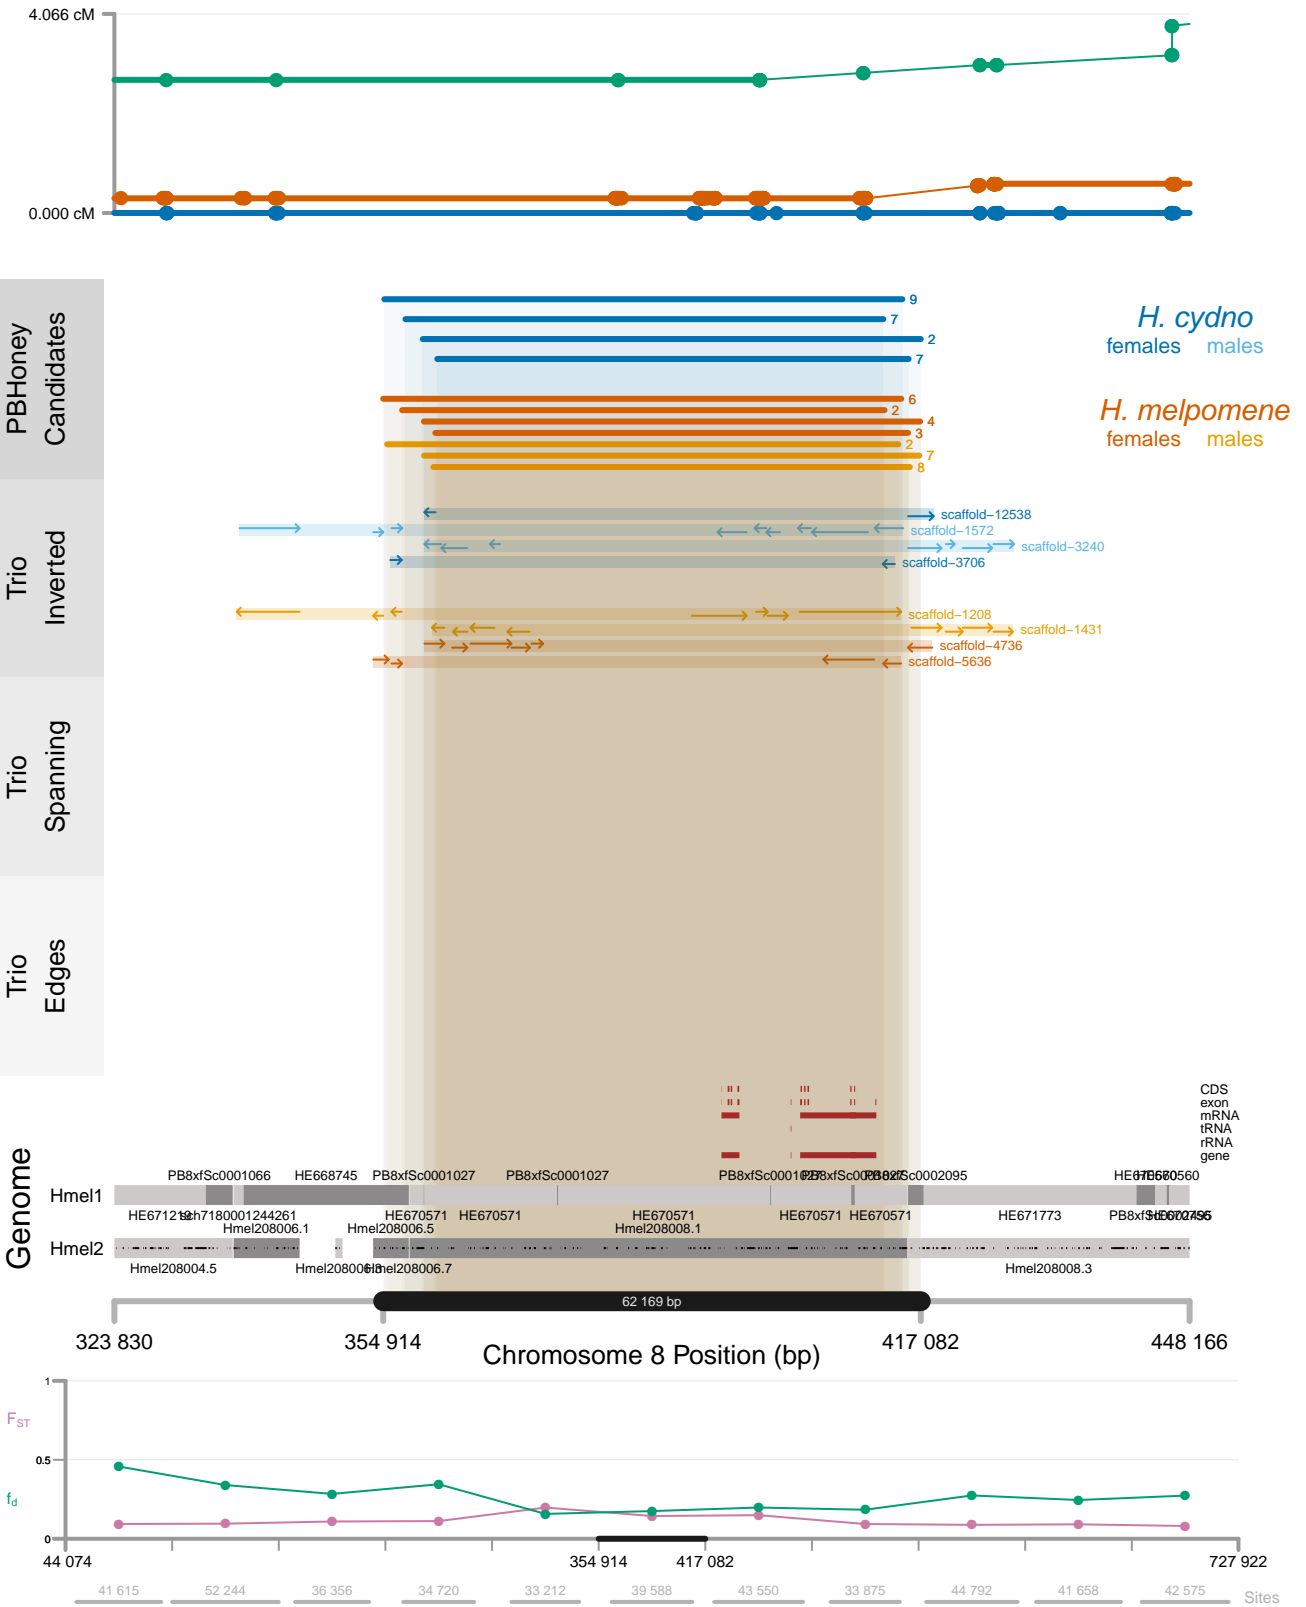

Figure S12.14

Both species

Split reads and trio assembly

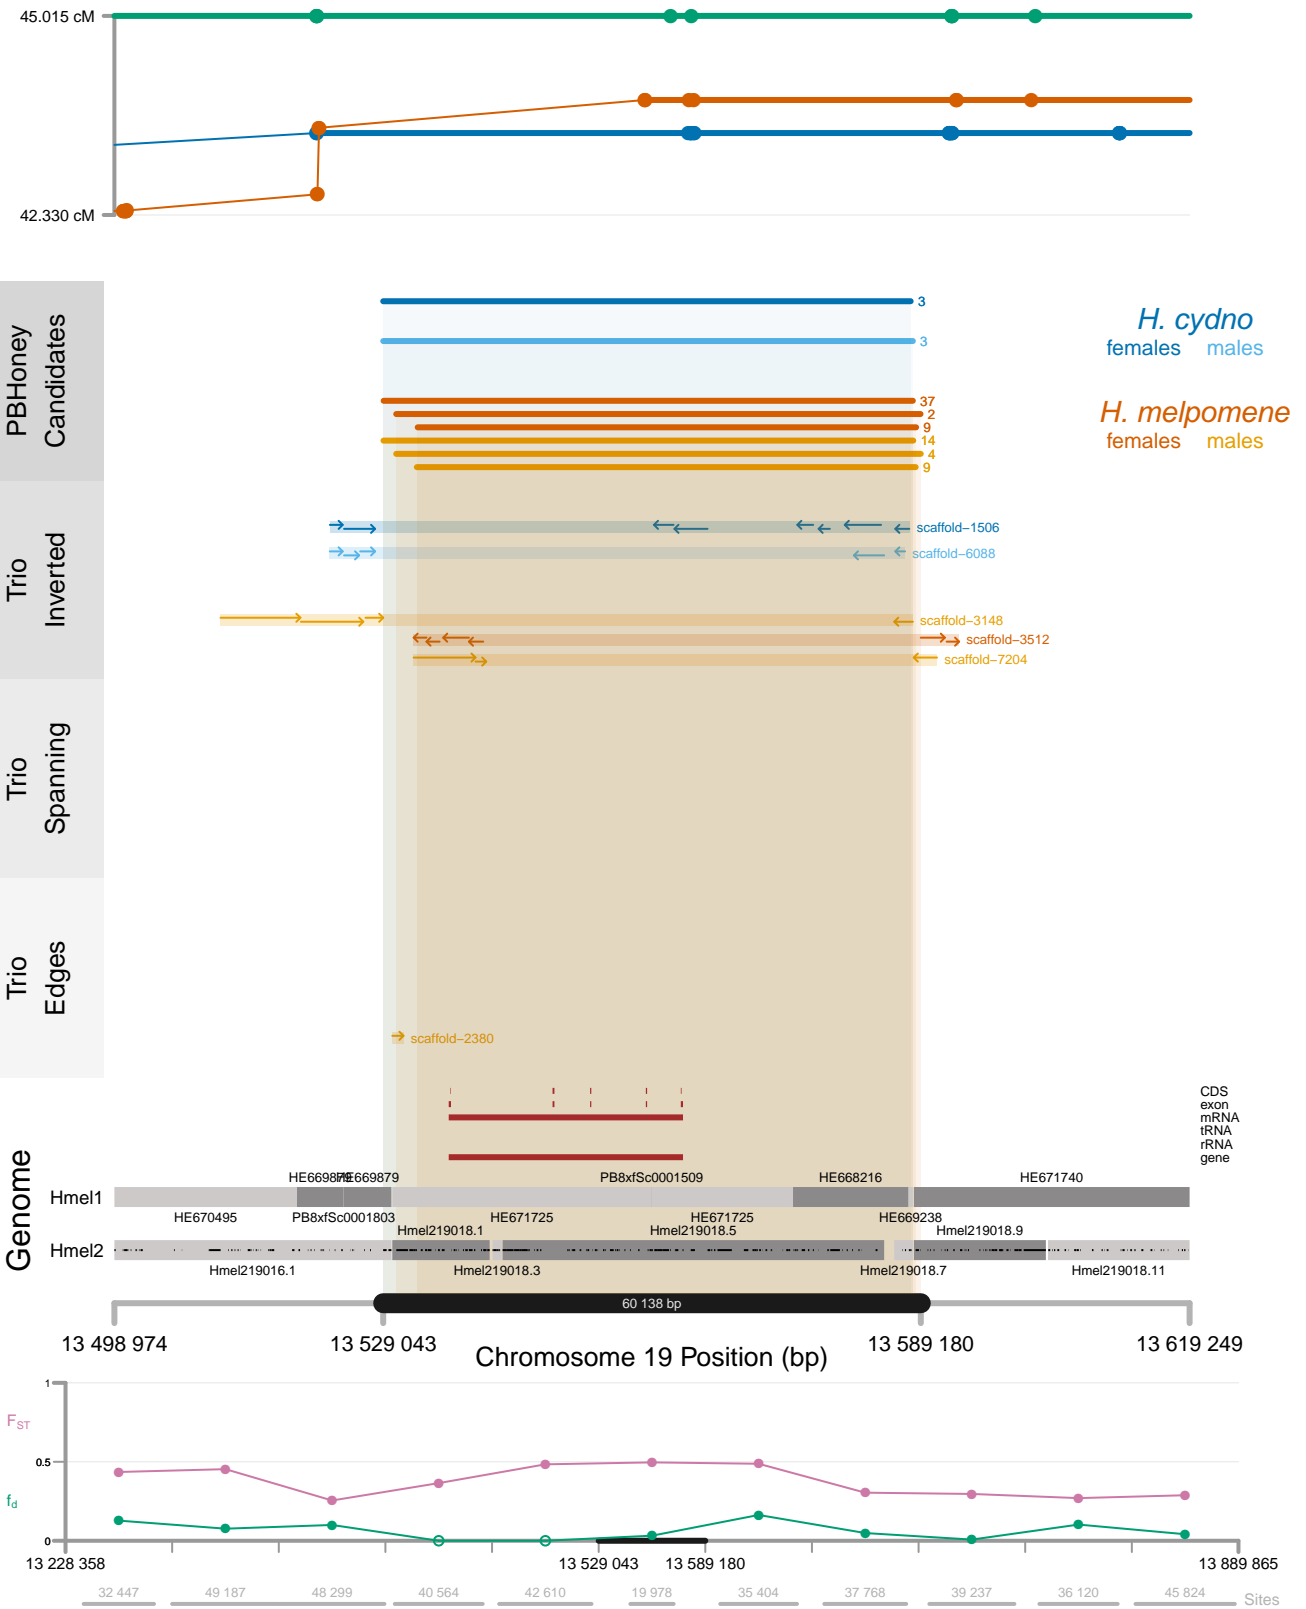



Figure S12.16

Both species

Split reads and trio assembly

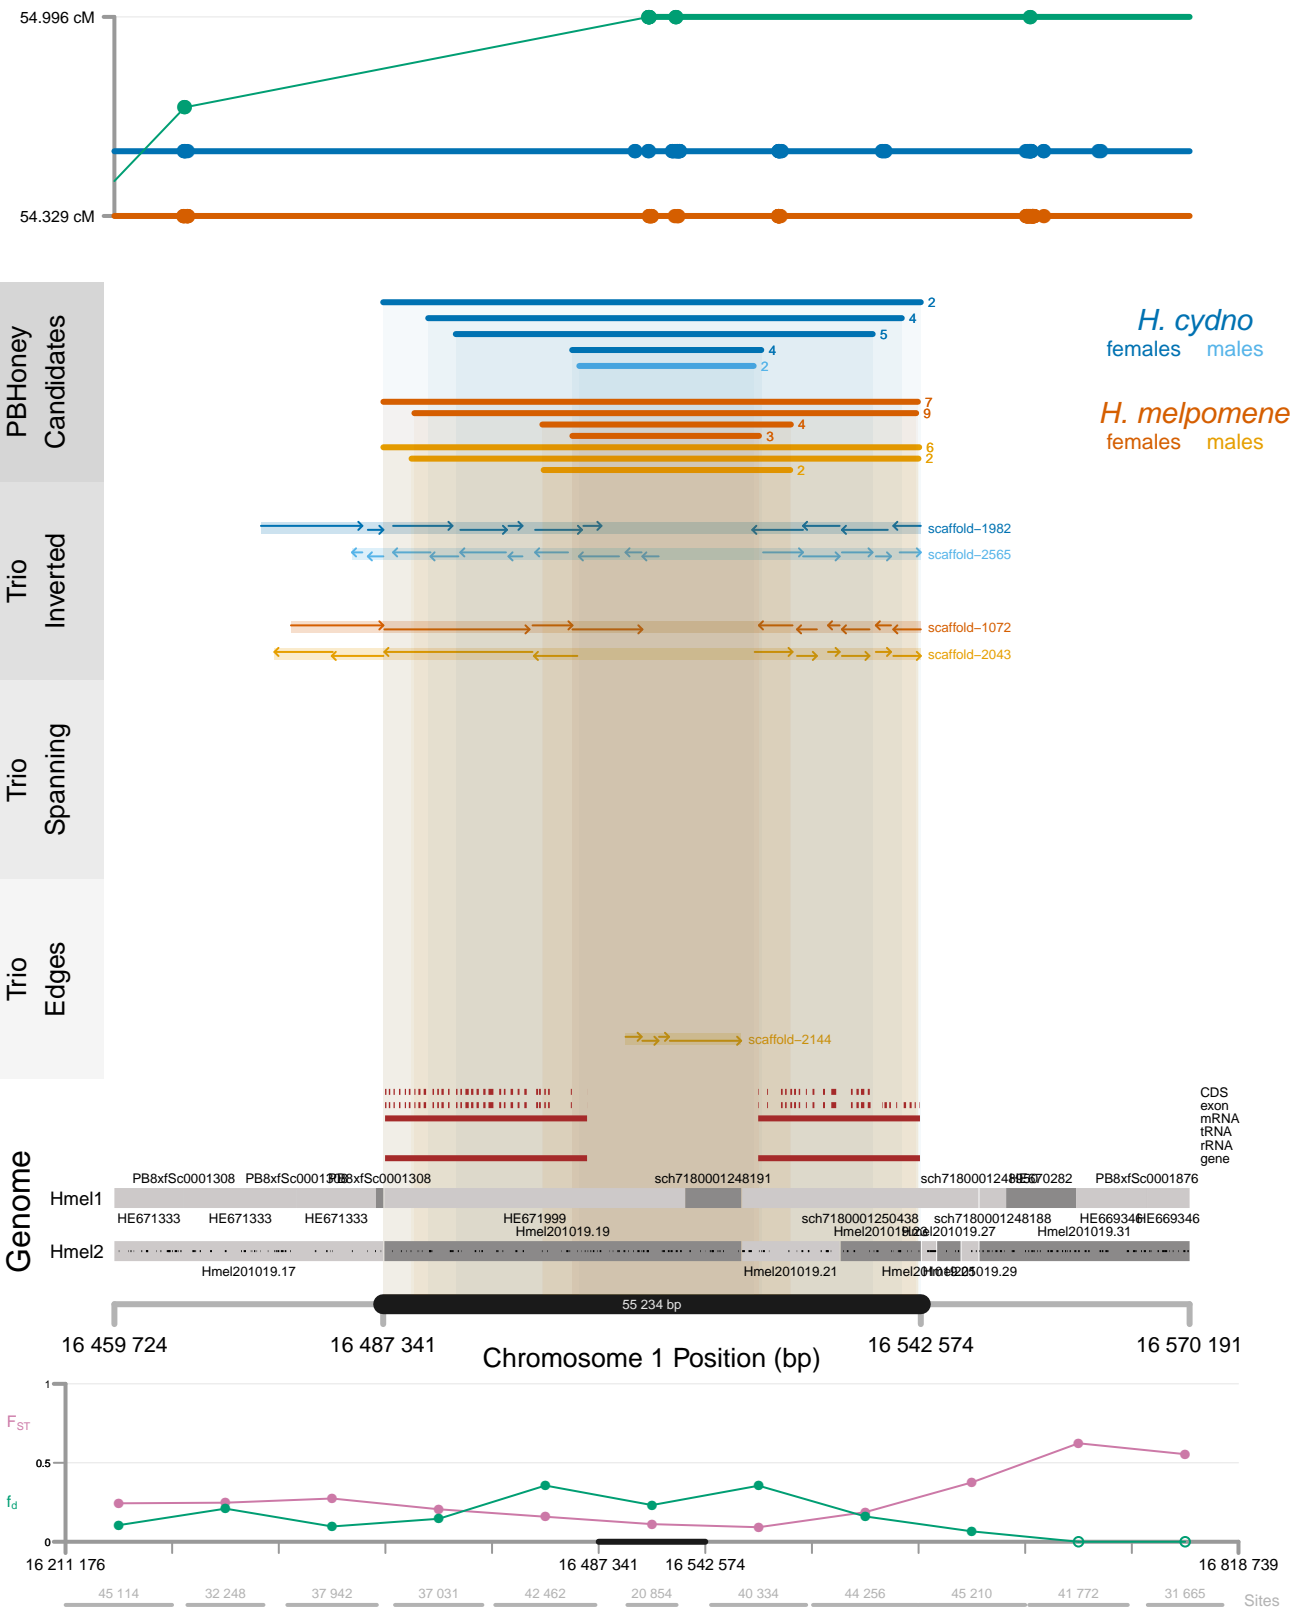



Figure S12.17

Both species

Split reads and trio assembly

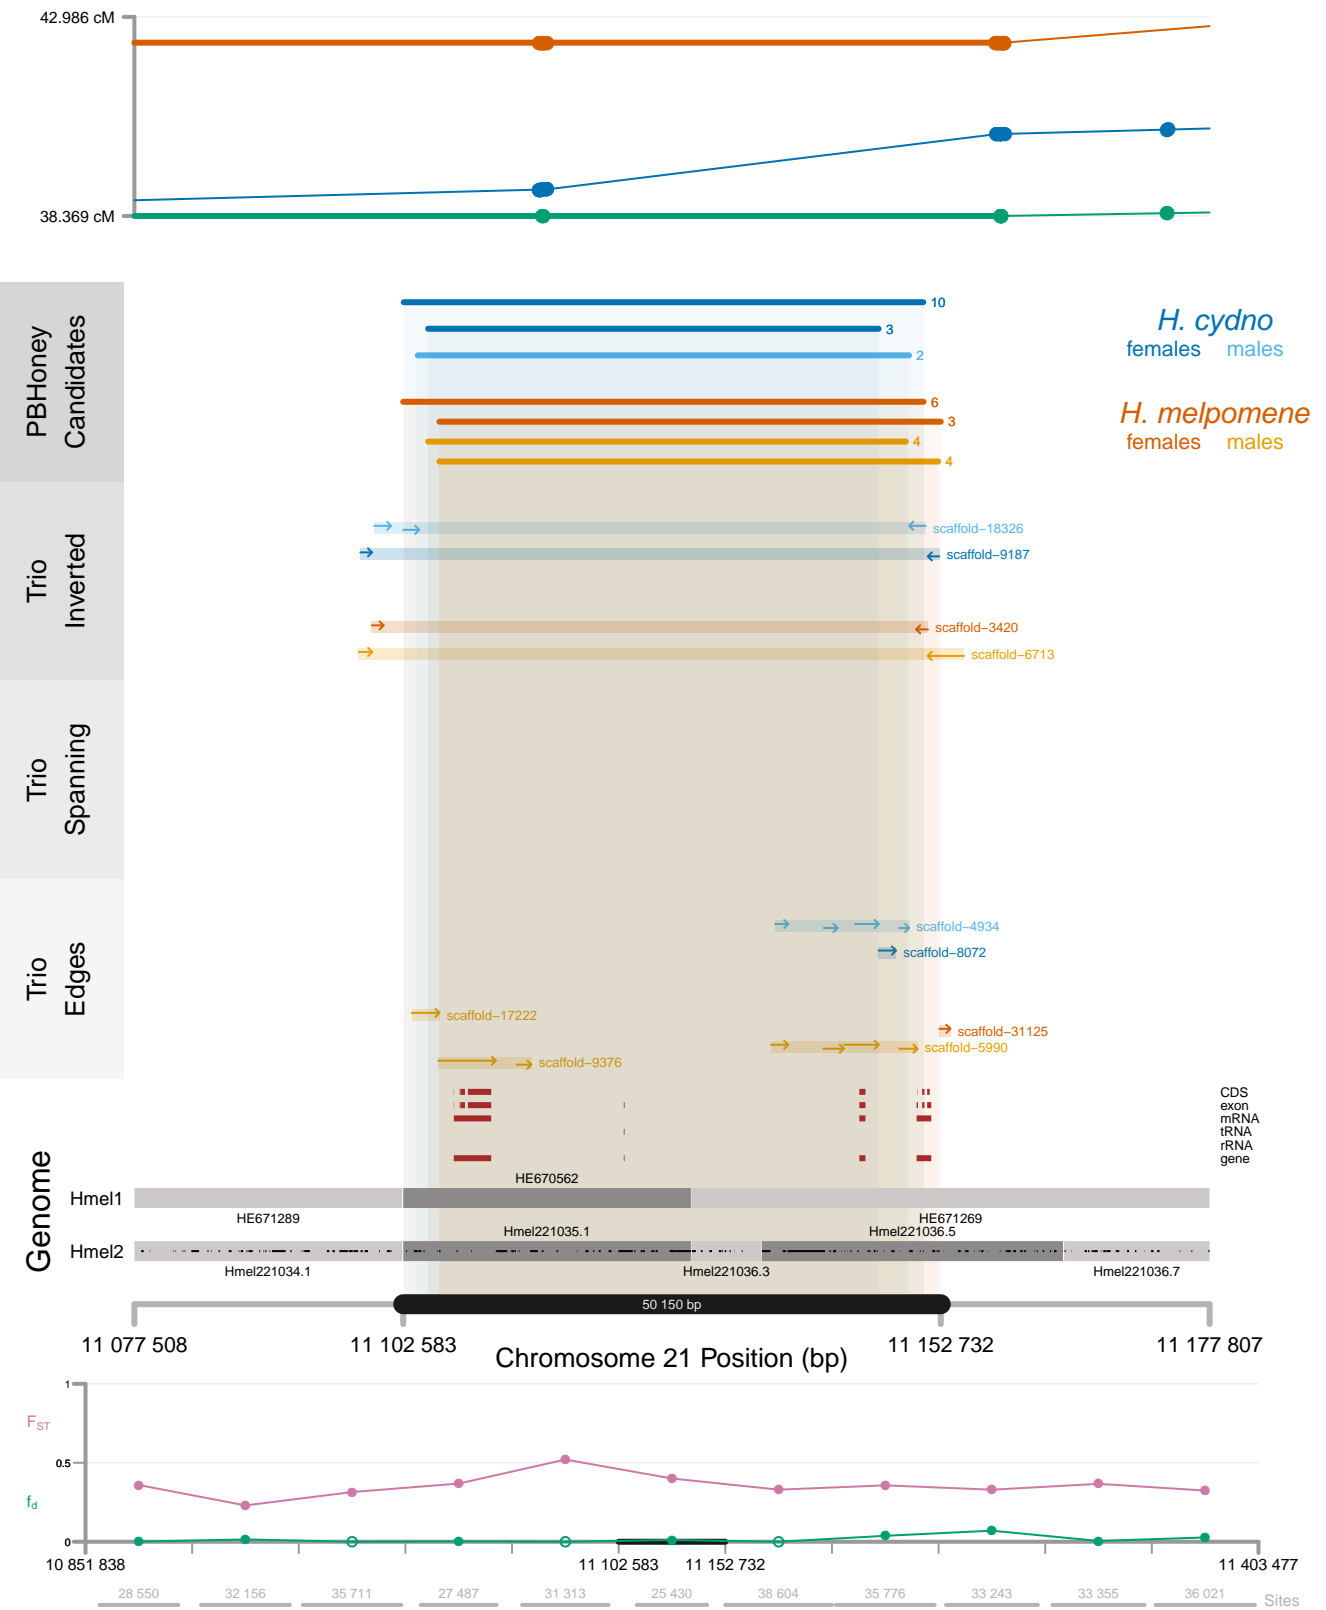

Figure S12.18

Both species

Split reads and trio assembly

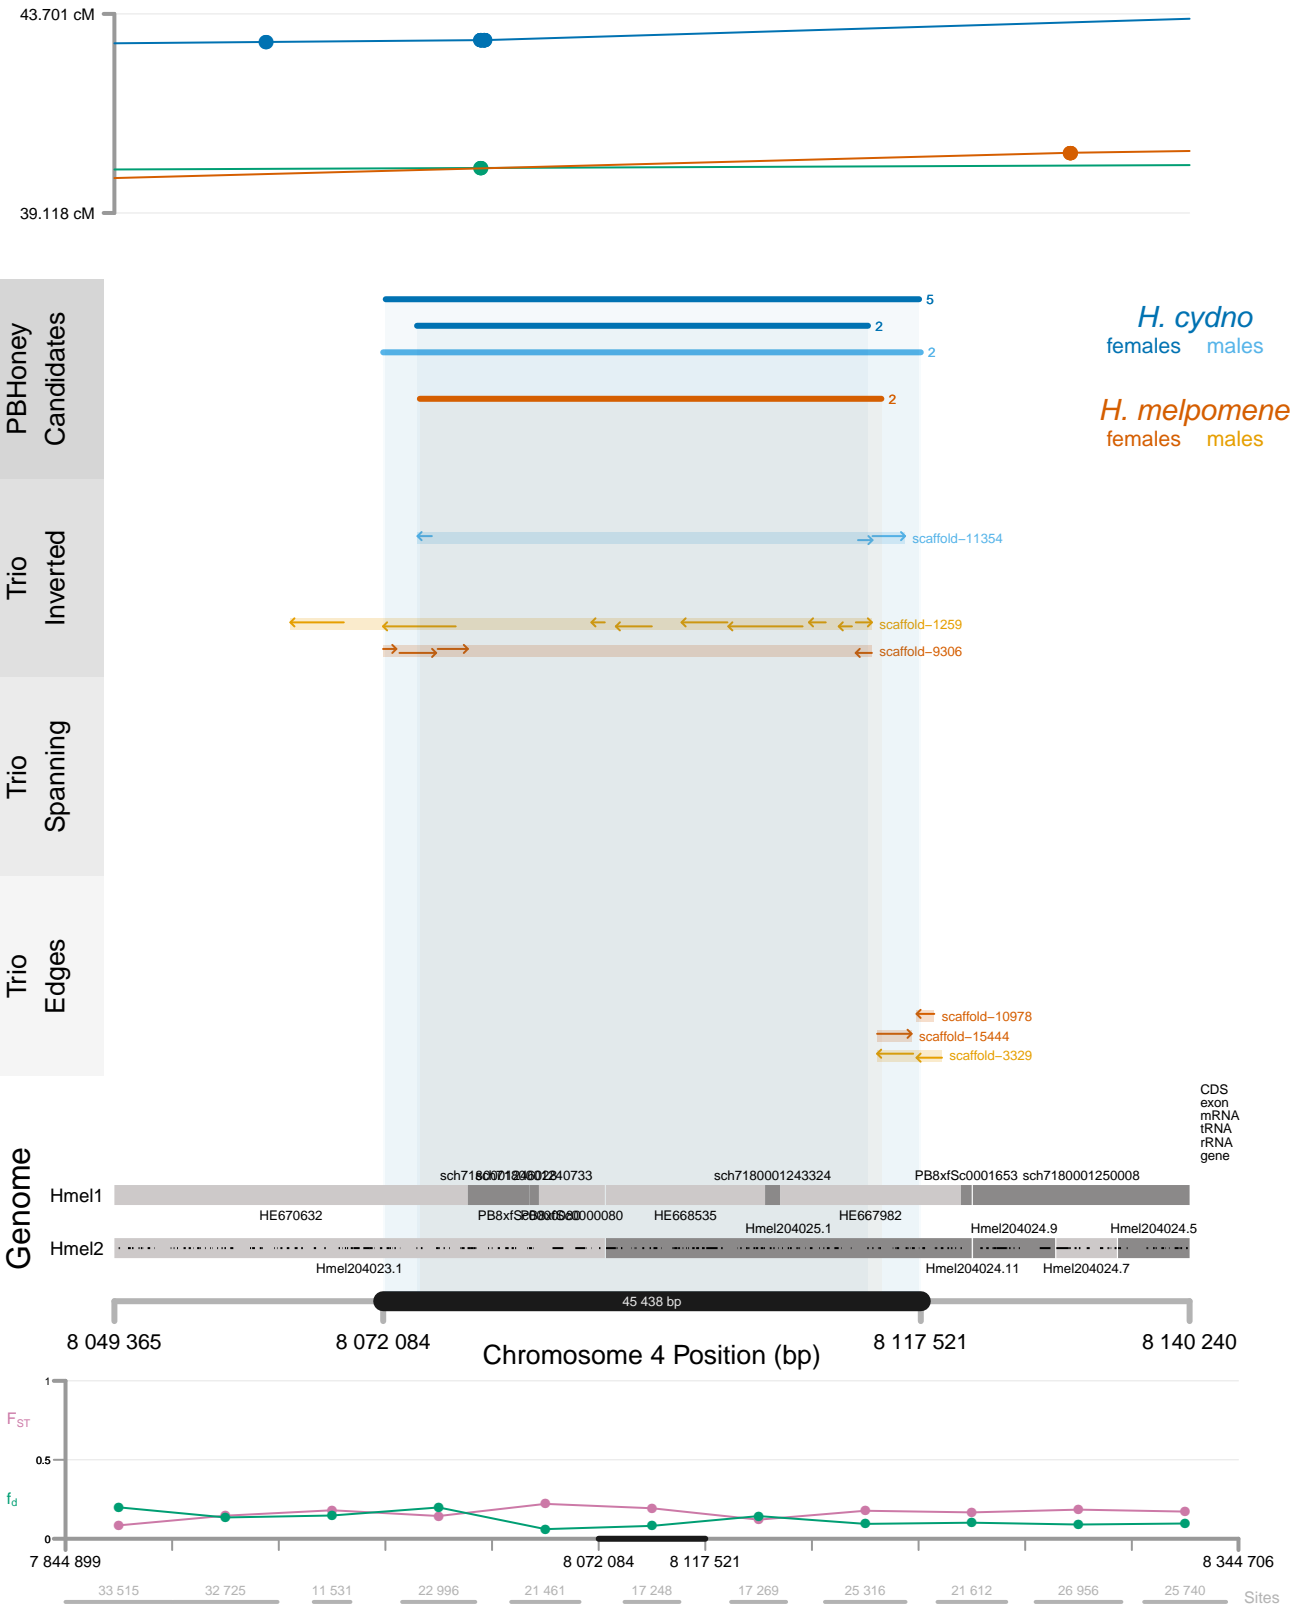

Figure S12.19

Both species

Split reads and trio assembly

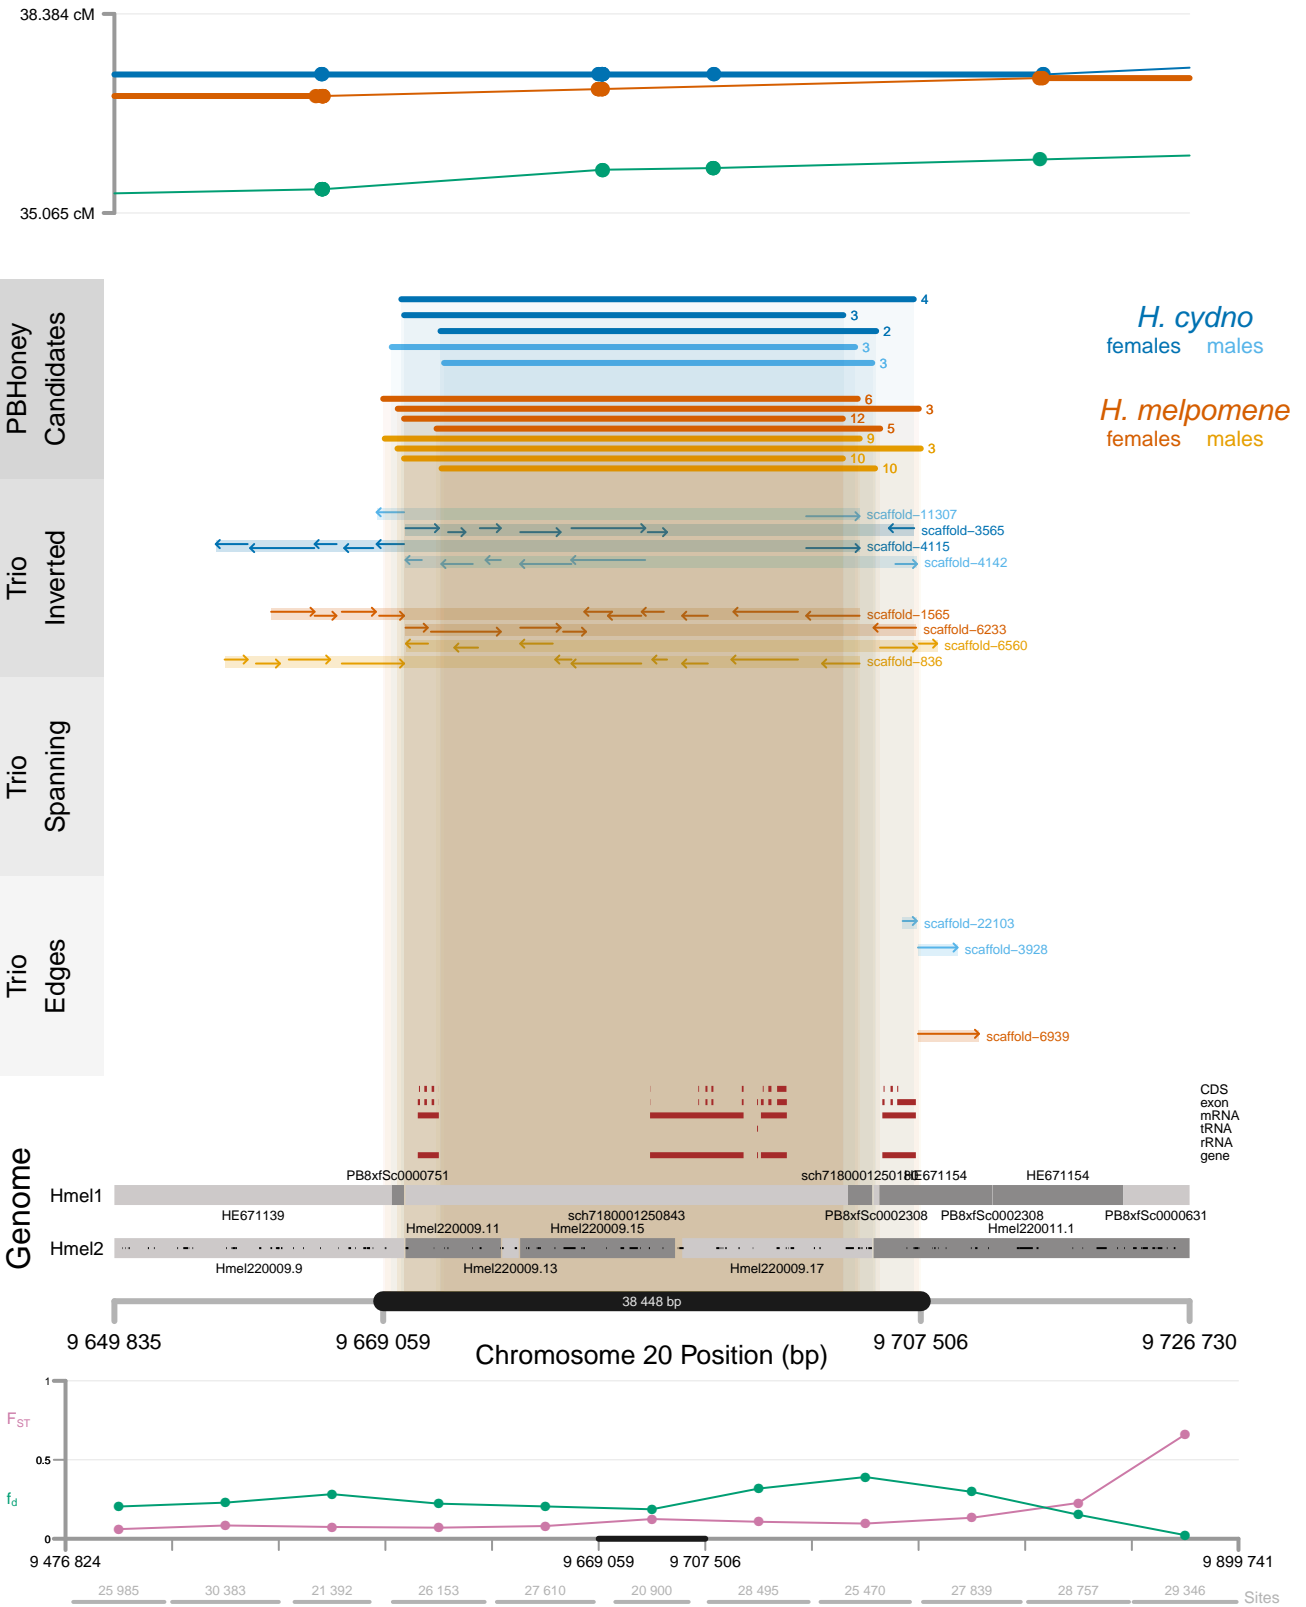

Figure S12.20

Both species

Split reads and trio assembly

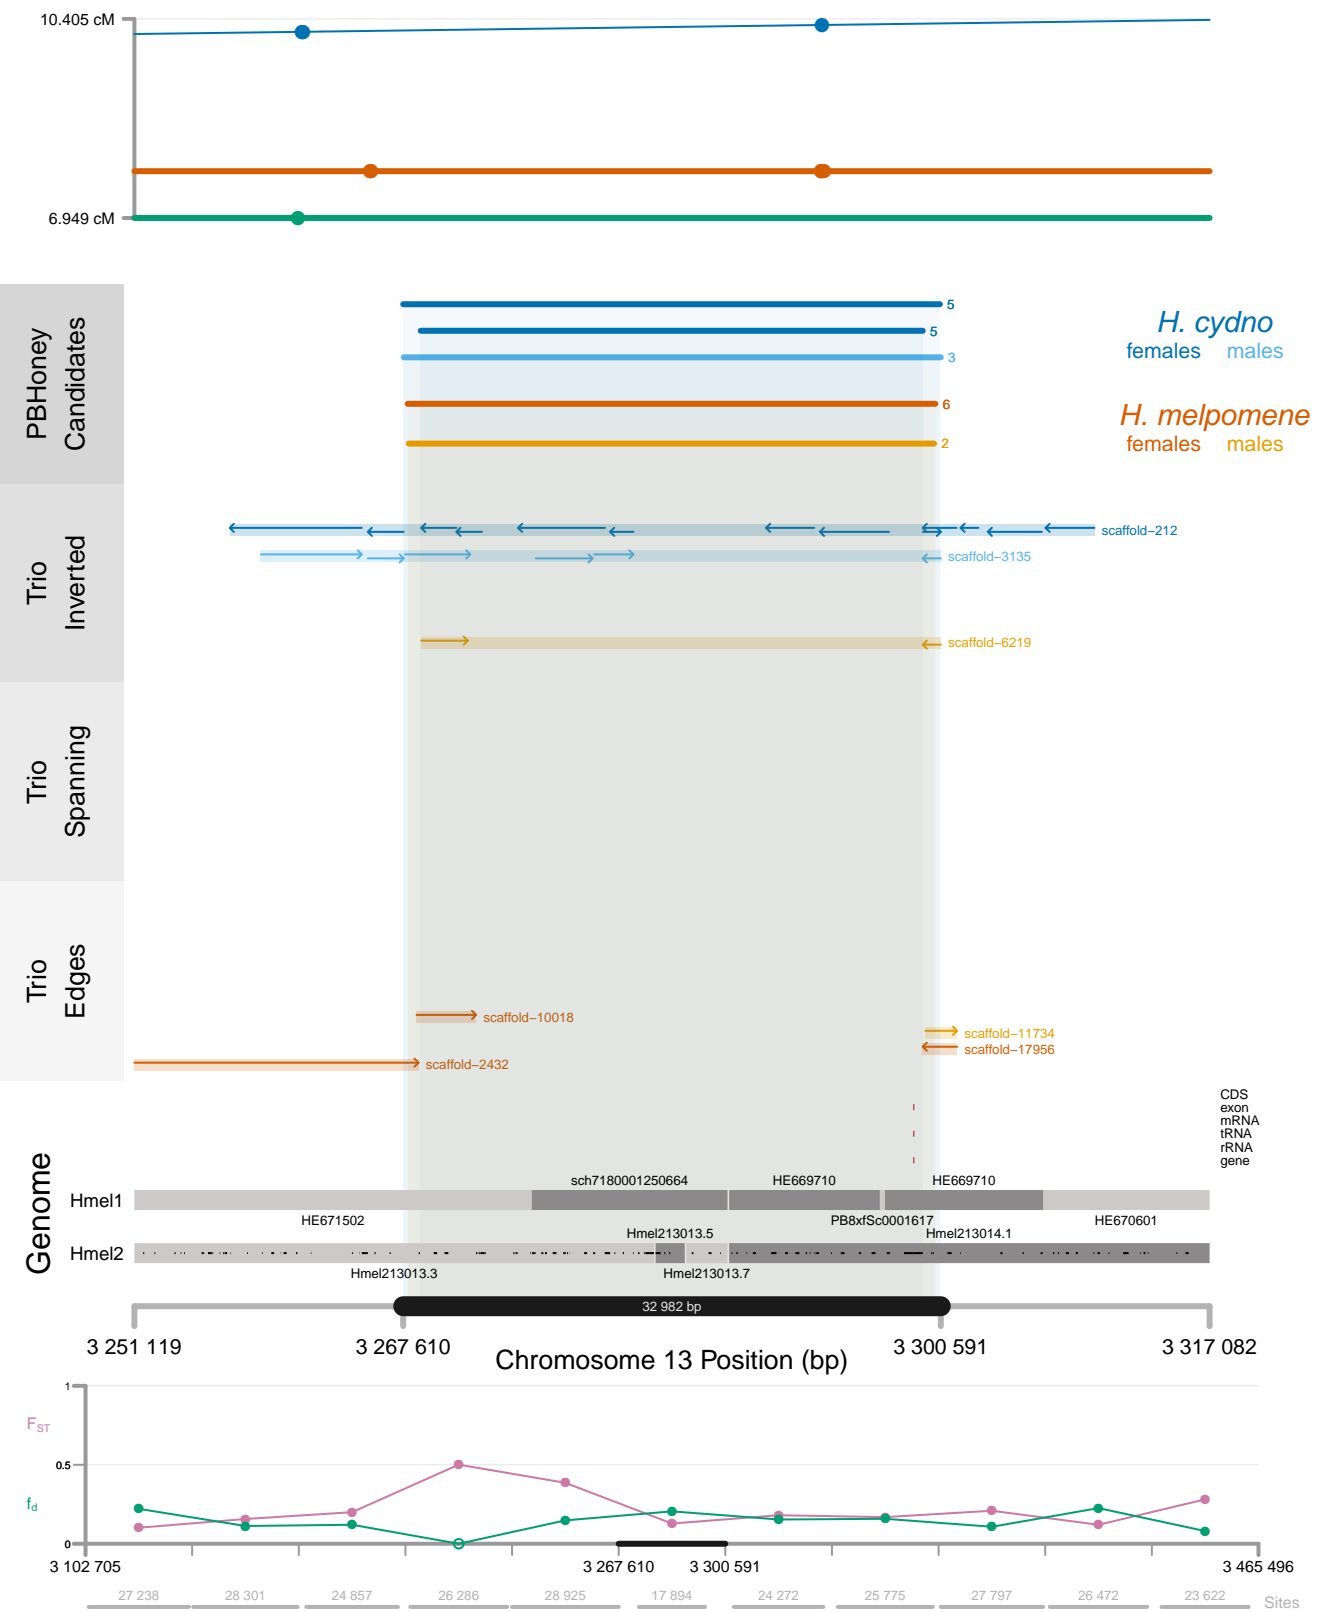

*H. cydno*  
females males

*H. melpomene*  
females males

CDS  
exon  
mRNA  
tRNA  
rRNA  
gene

Chromosome 13 Position (bp)

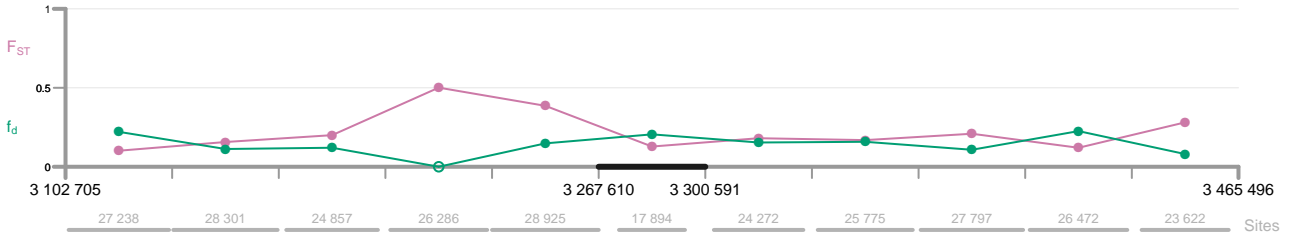

Figure S12.21

Both species

Split reads and trio assembly

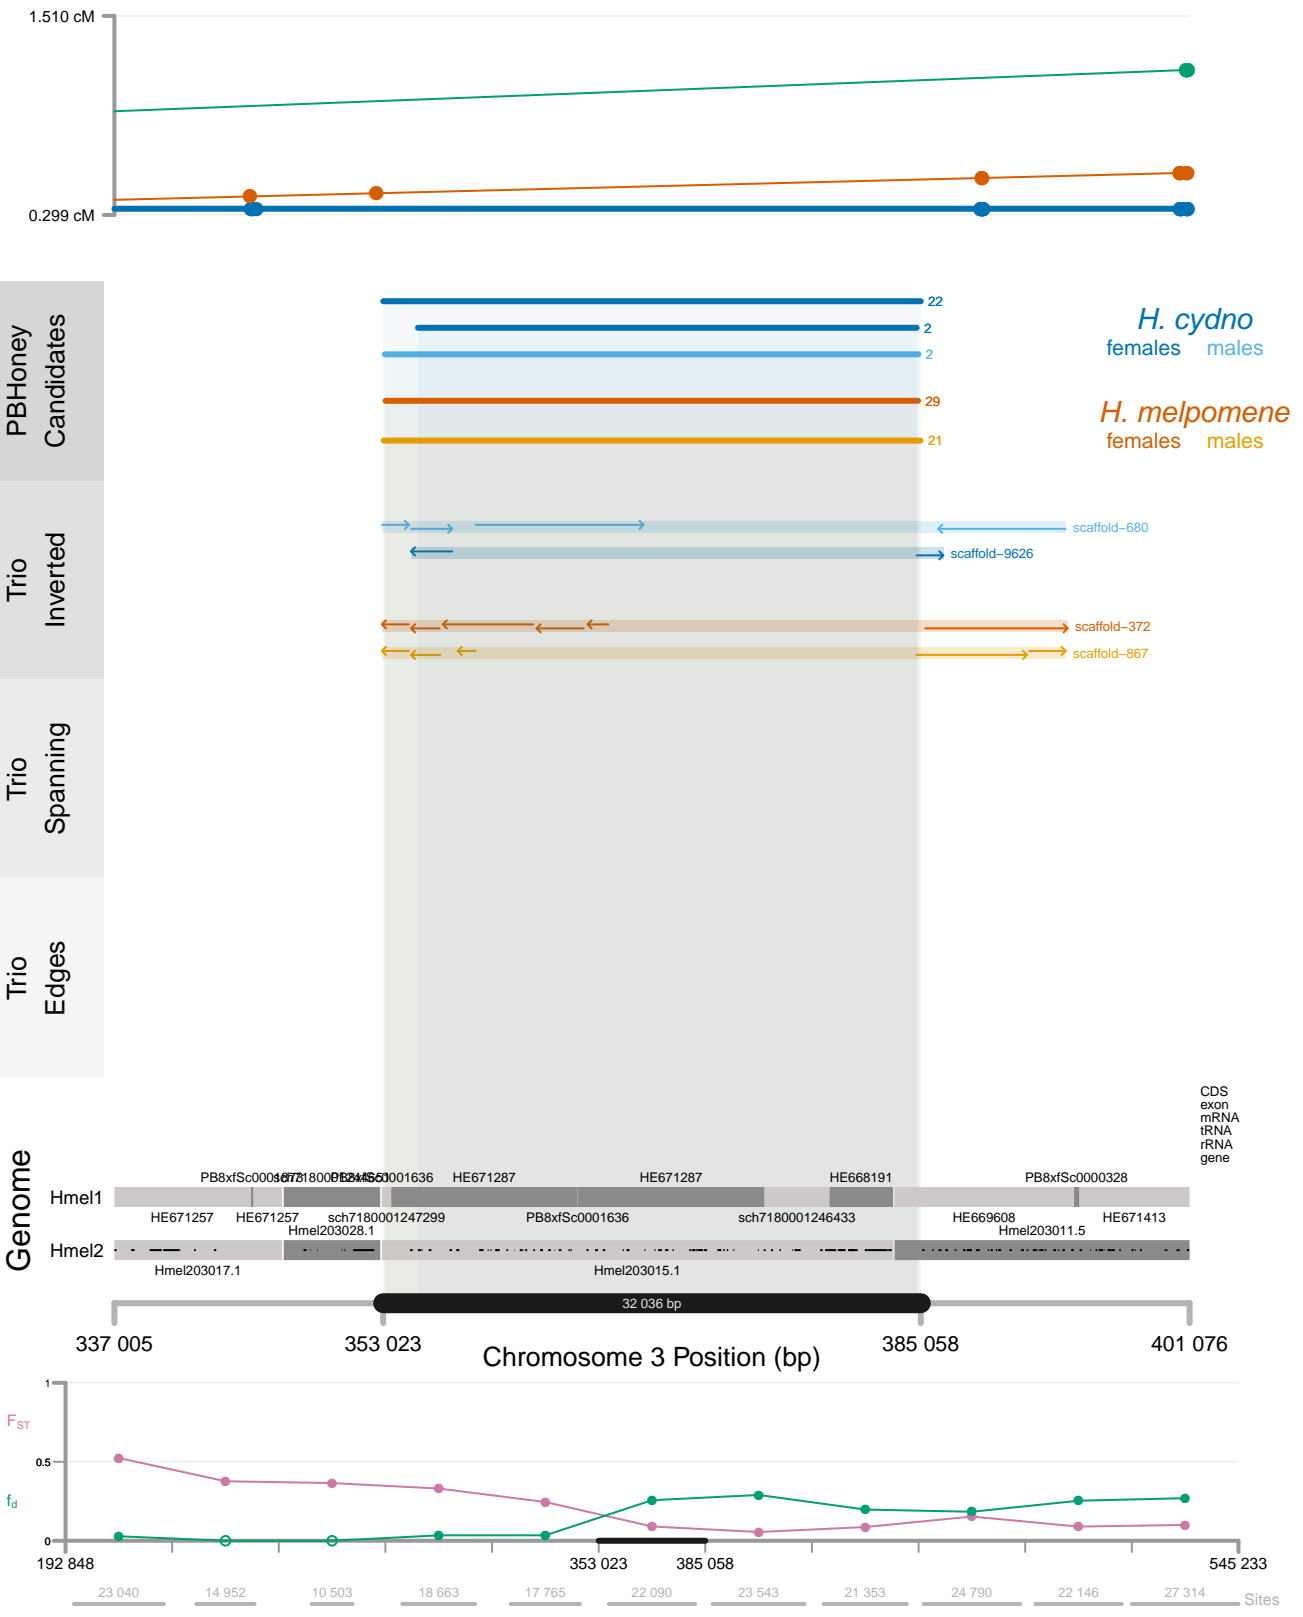

Figure S12.22

Both species

Split reads and trio assembly

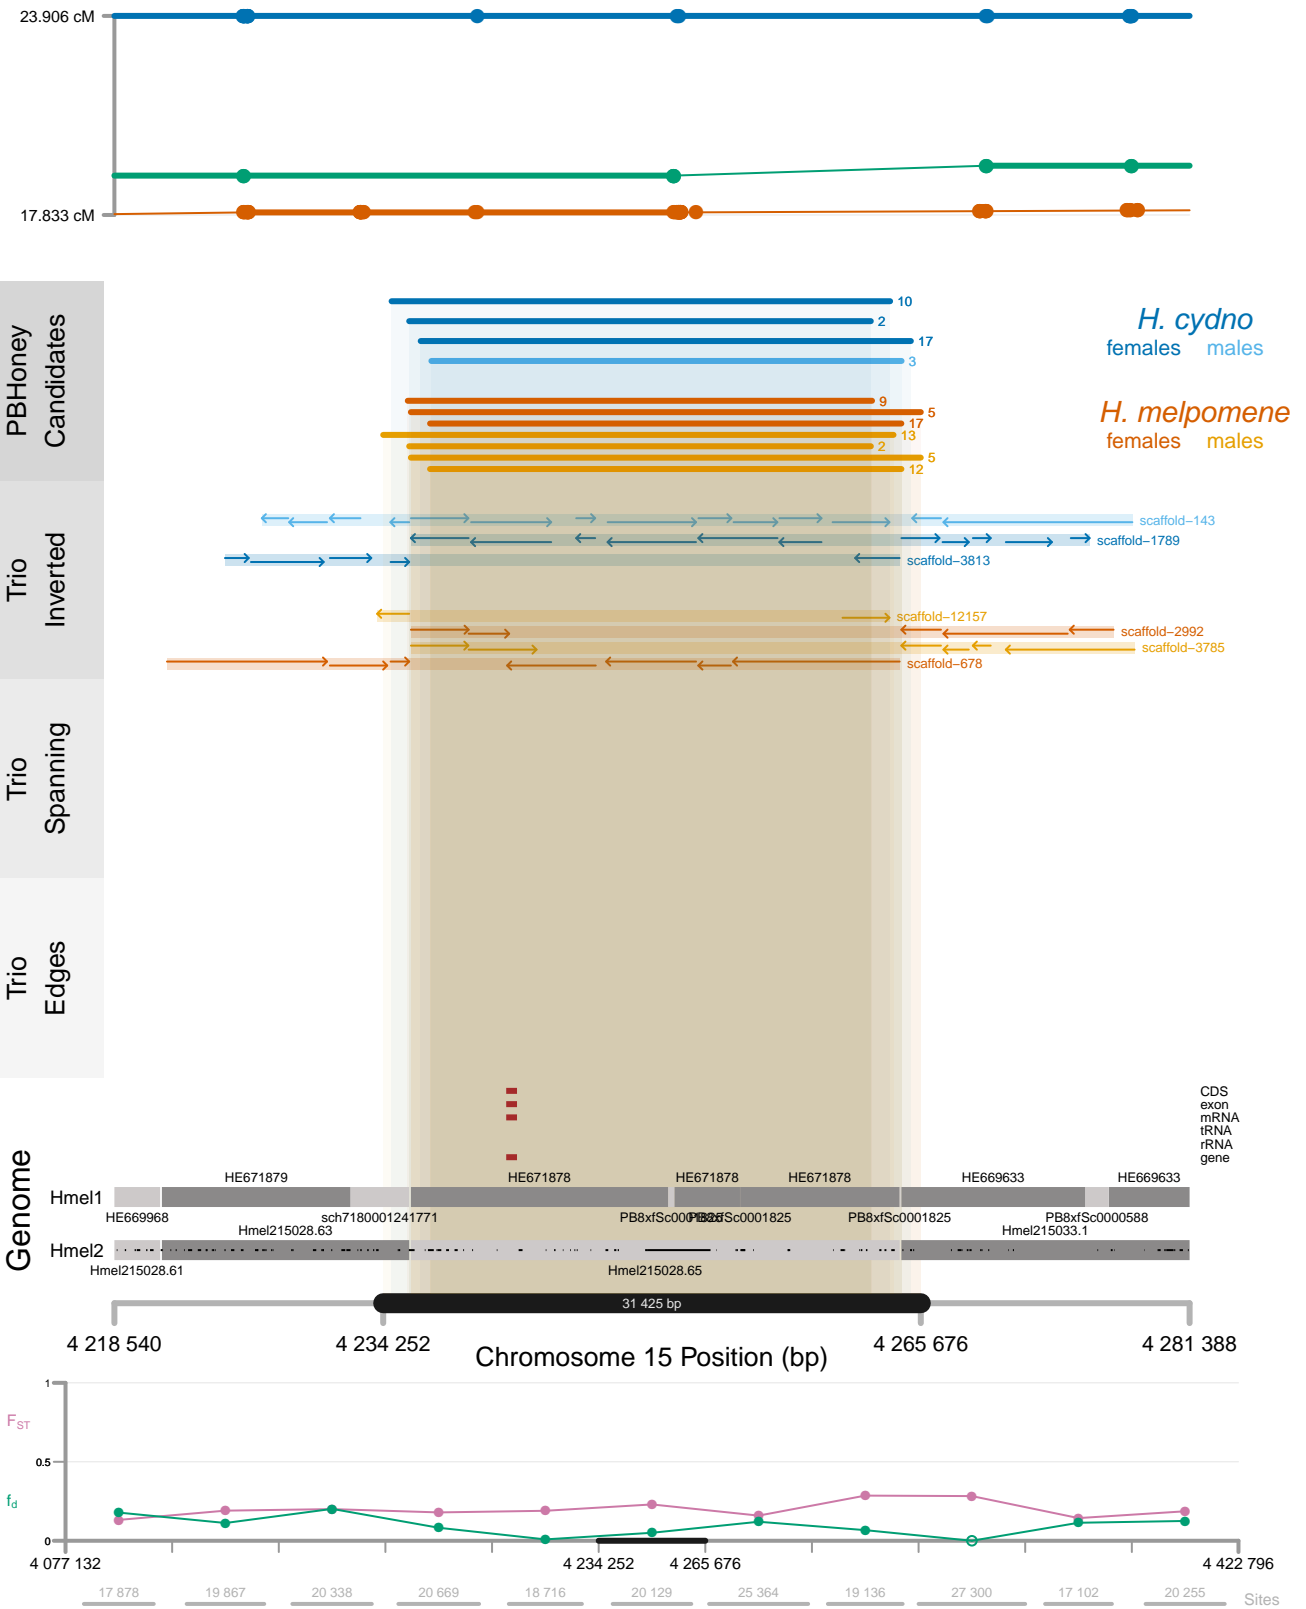

Figure S12.23

Both species

Split reads and trio assembly

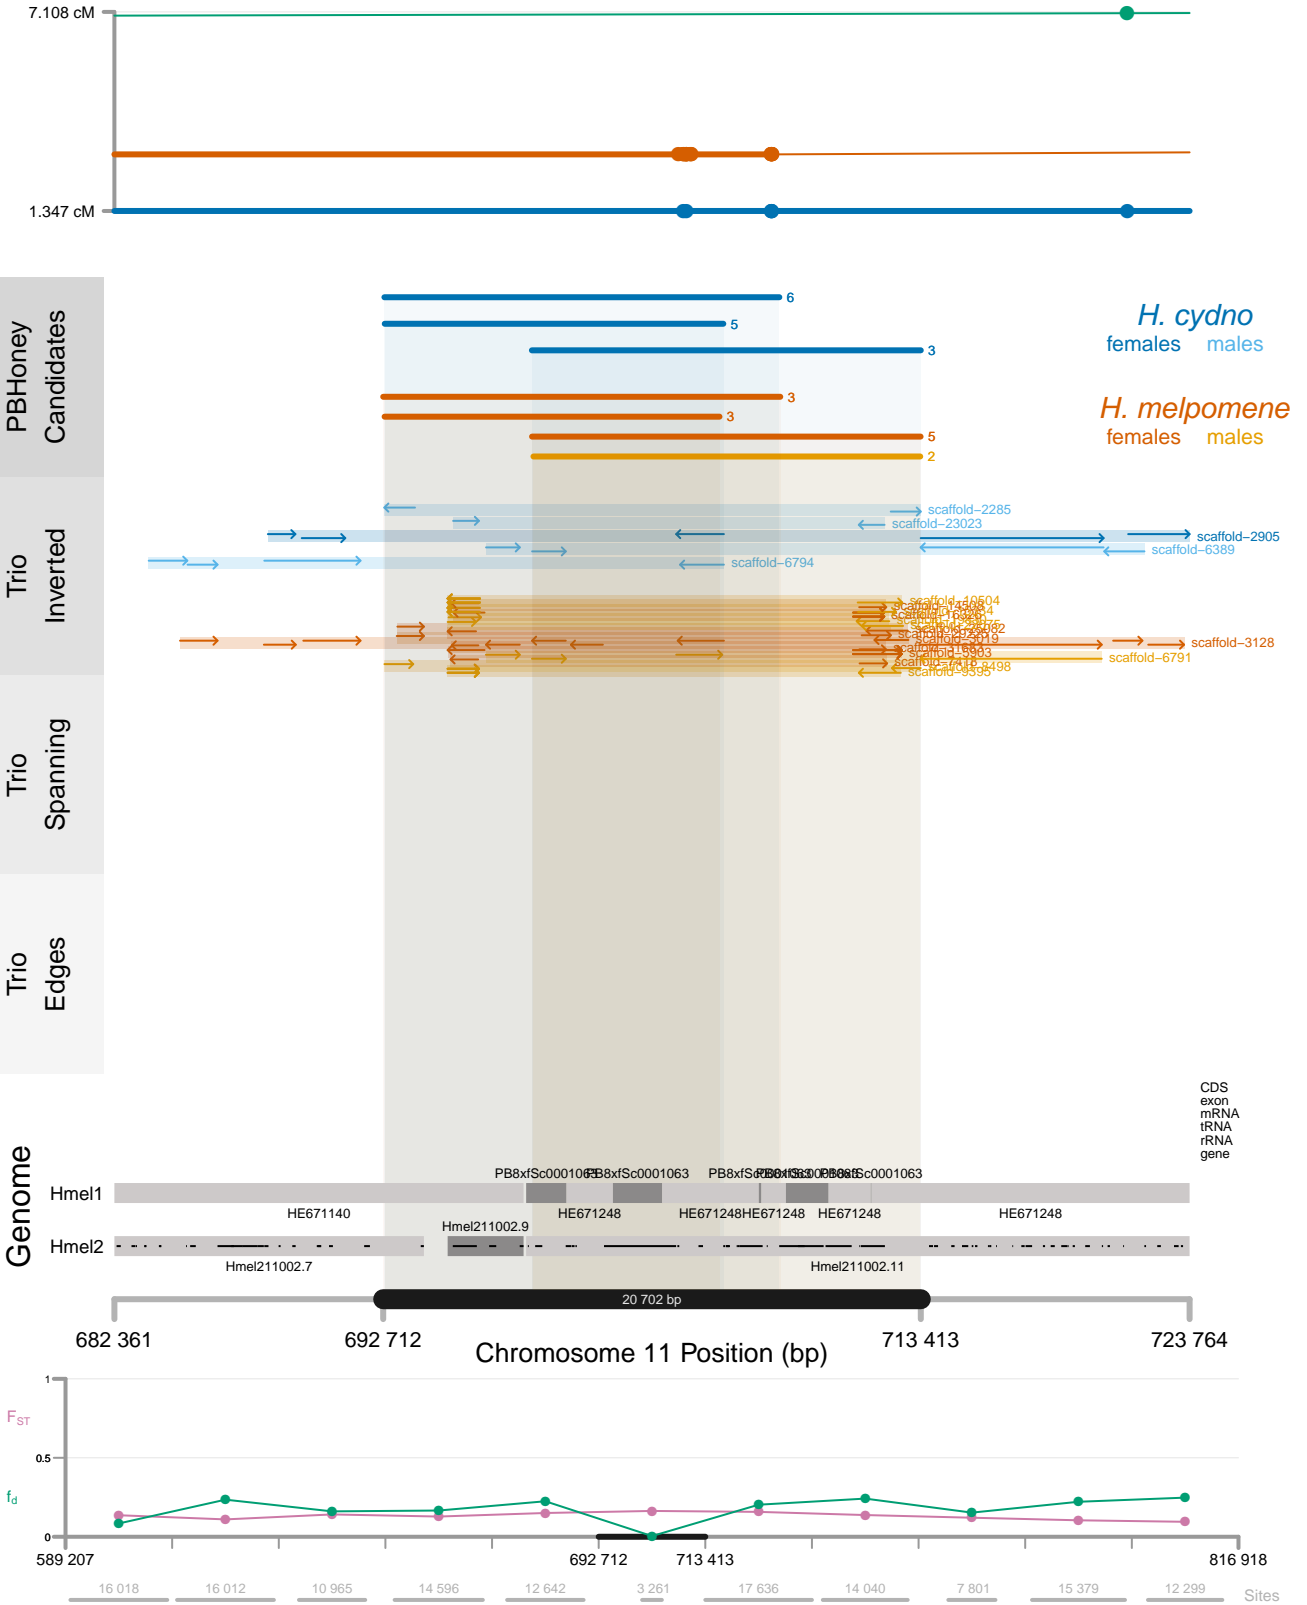

Figure S12.24

Both species

Split reads and trio assembly

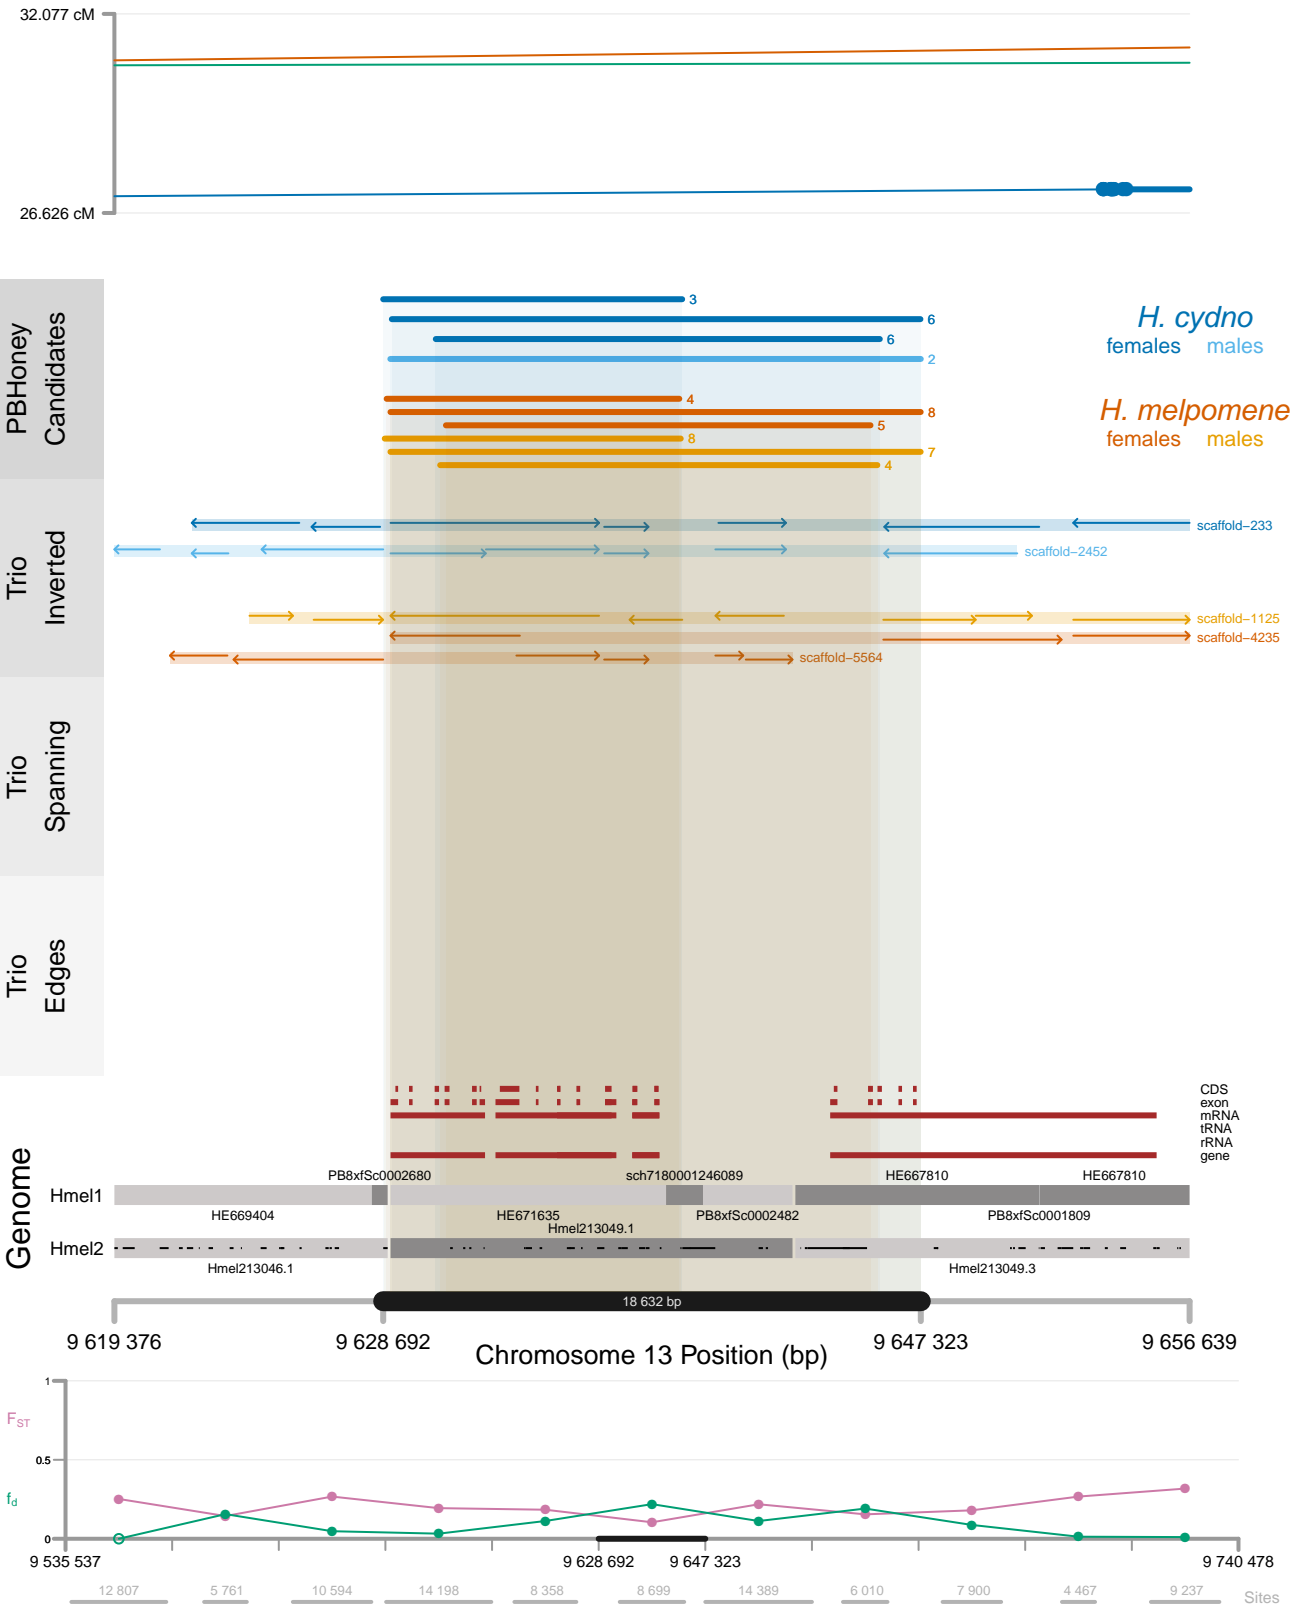



Figure S12.25

Both species

Split reads and trio assembly

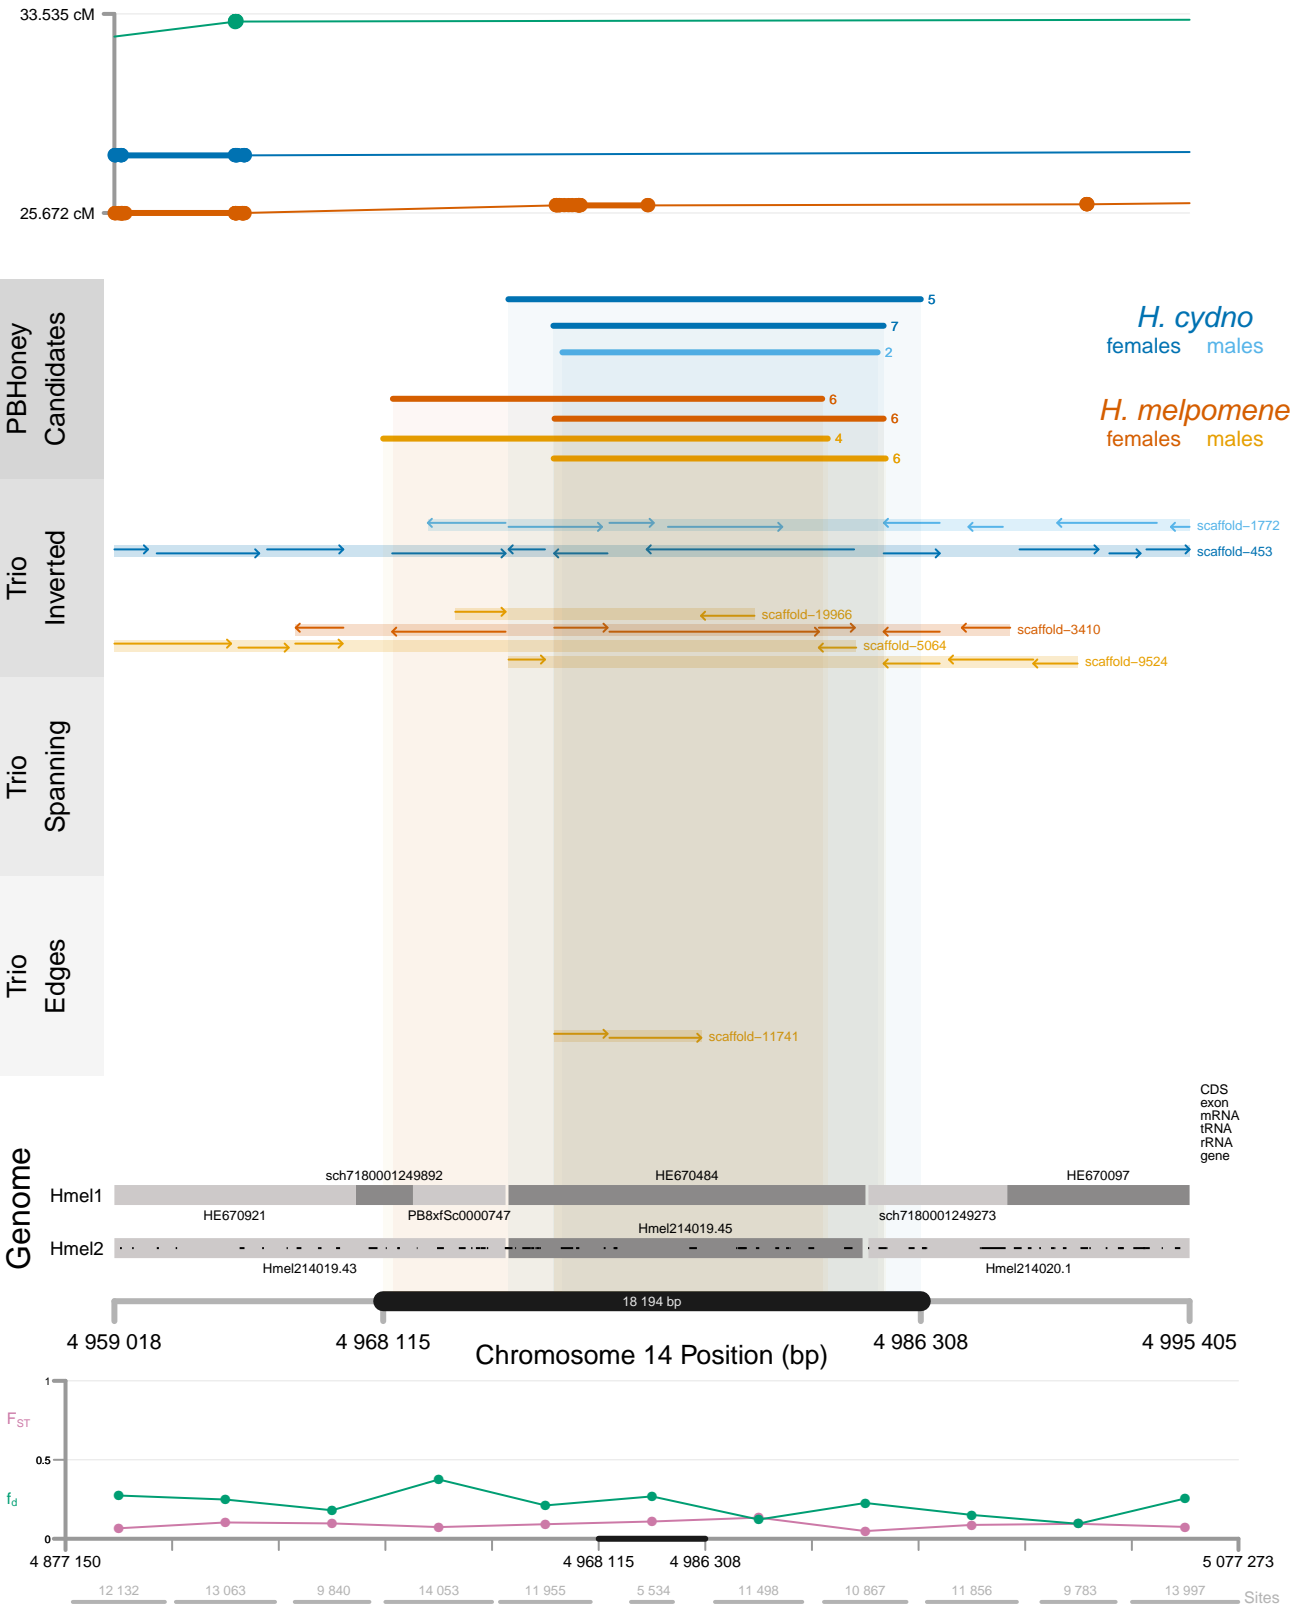

Figure S12.26

Both species

Split reads and trio assembly

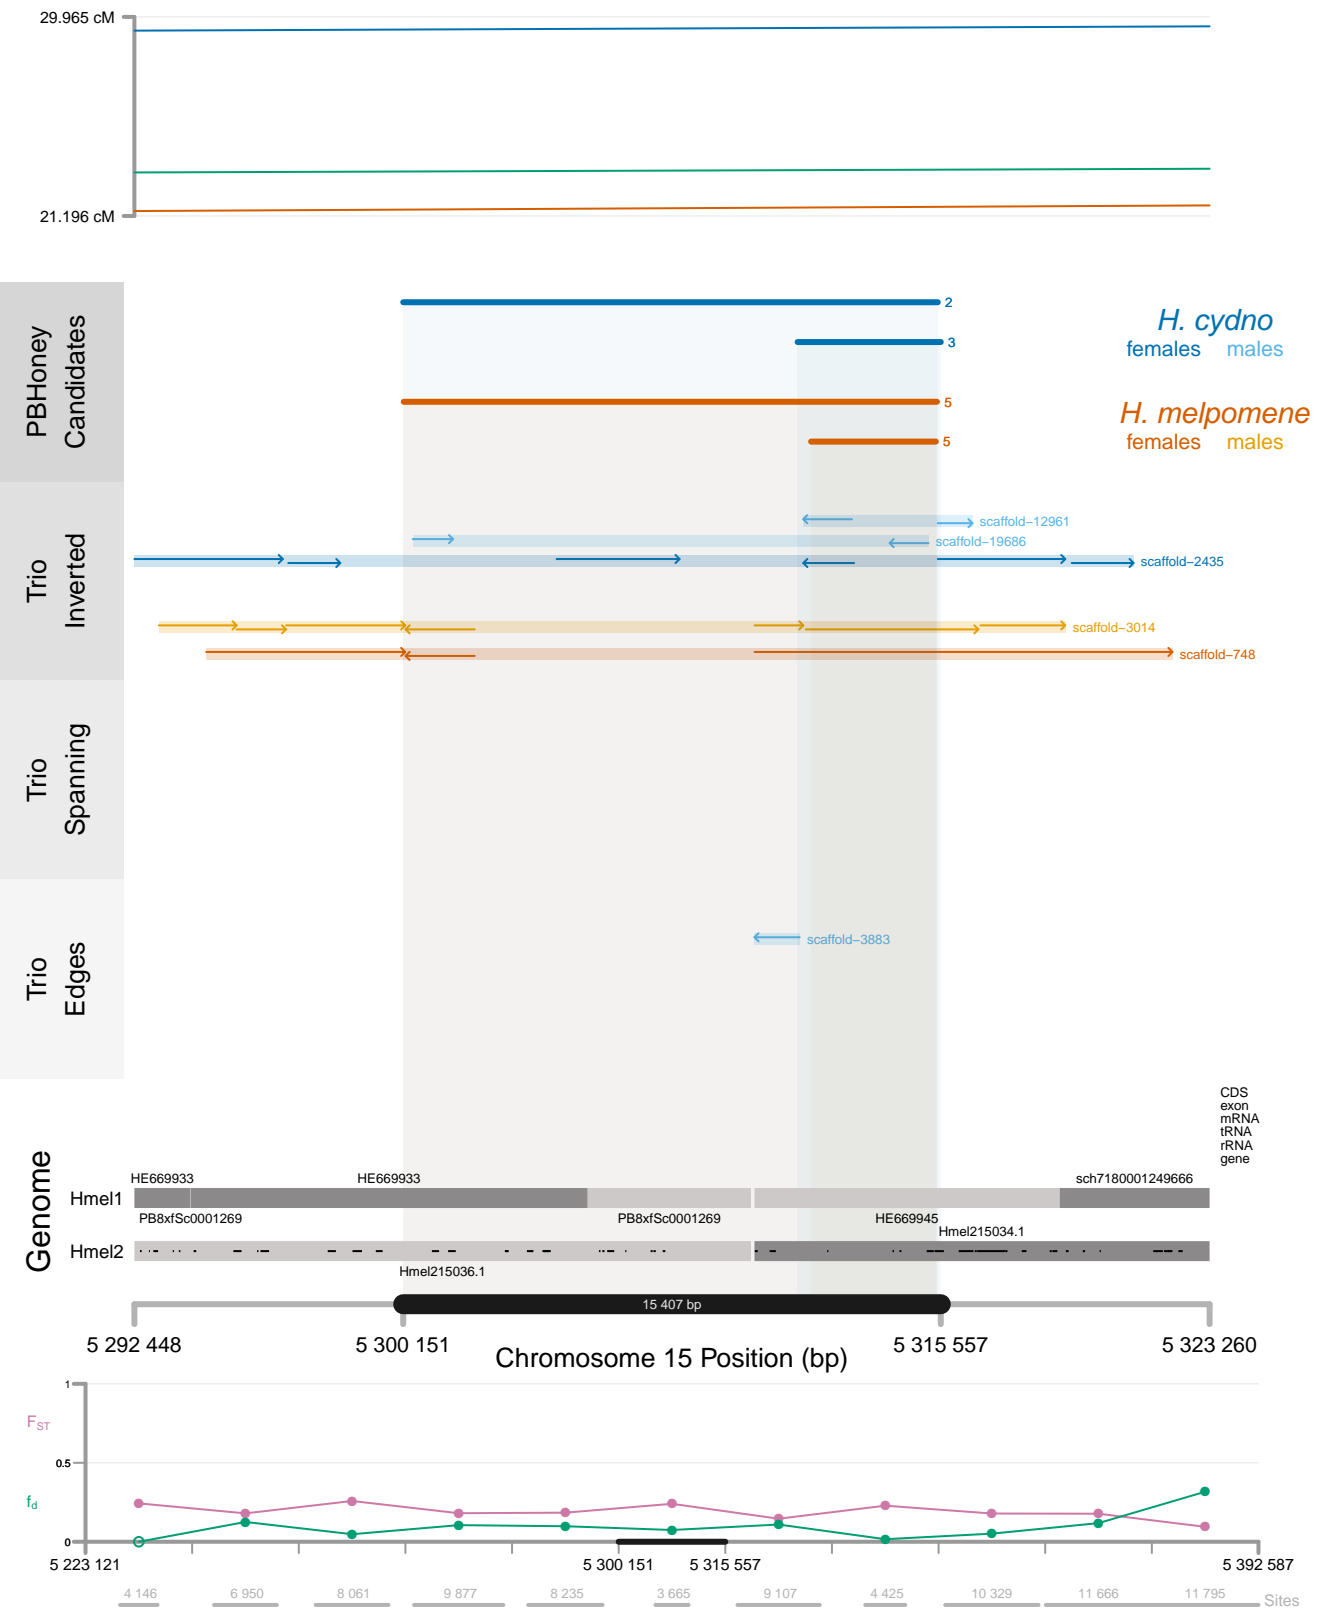

Figure S12.27

Both species

Split reads and trio assembly

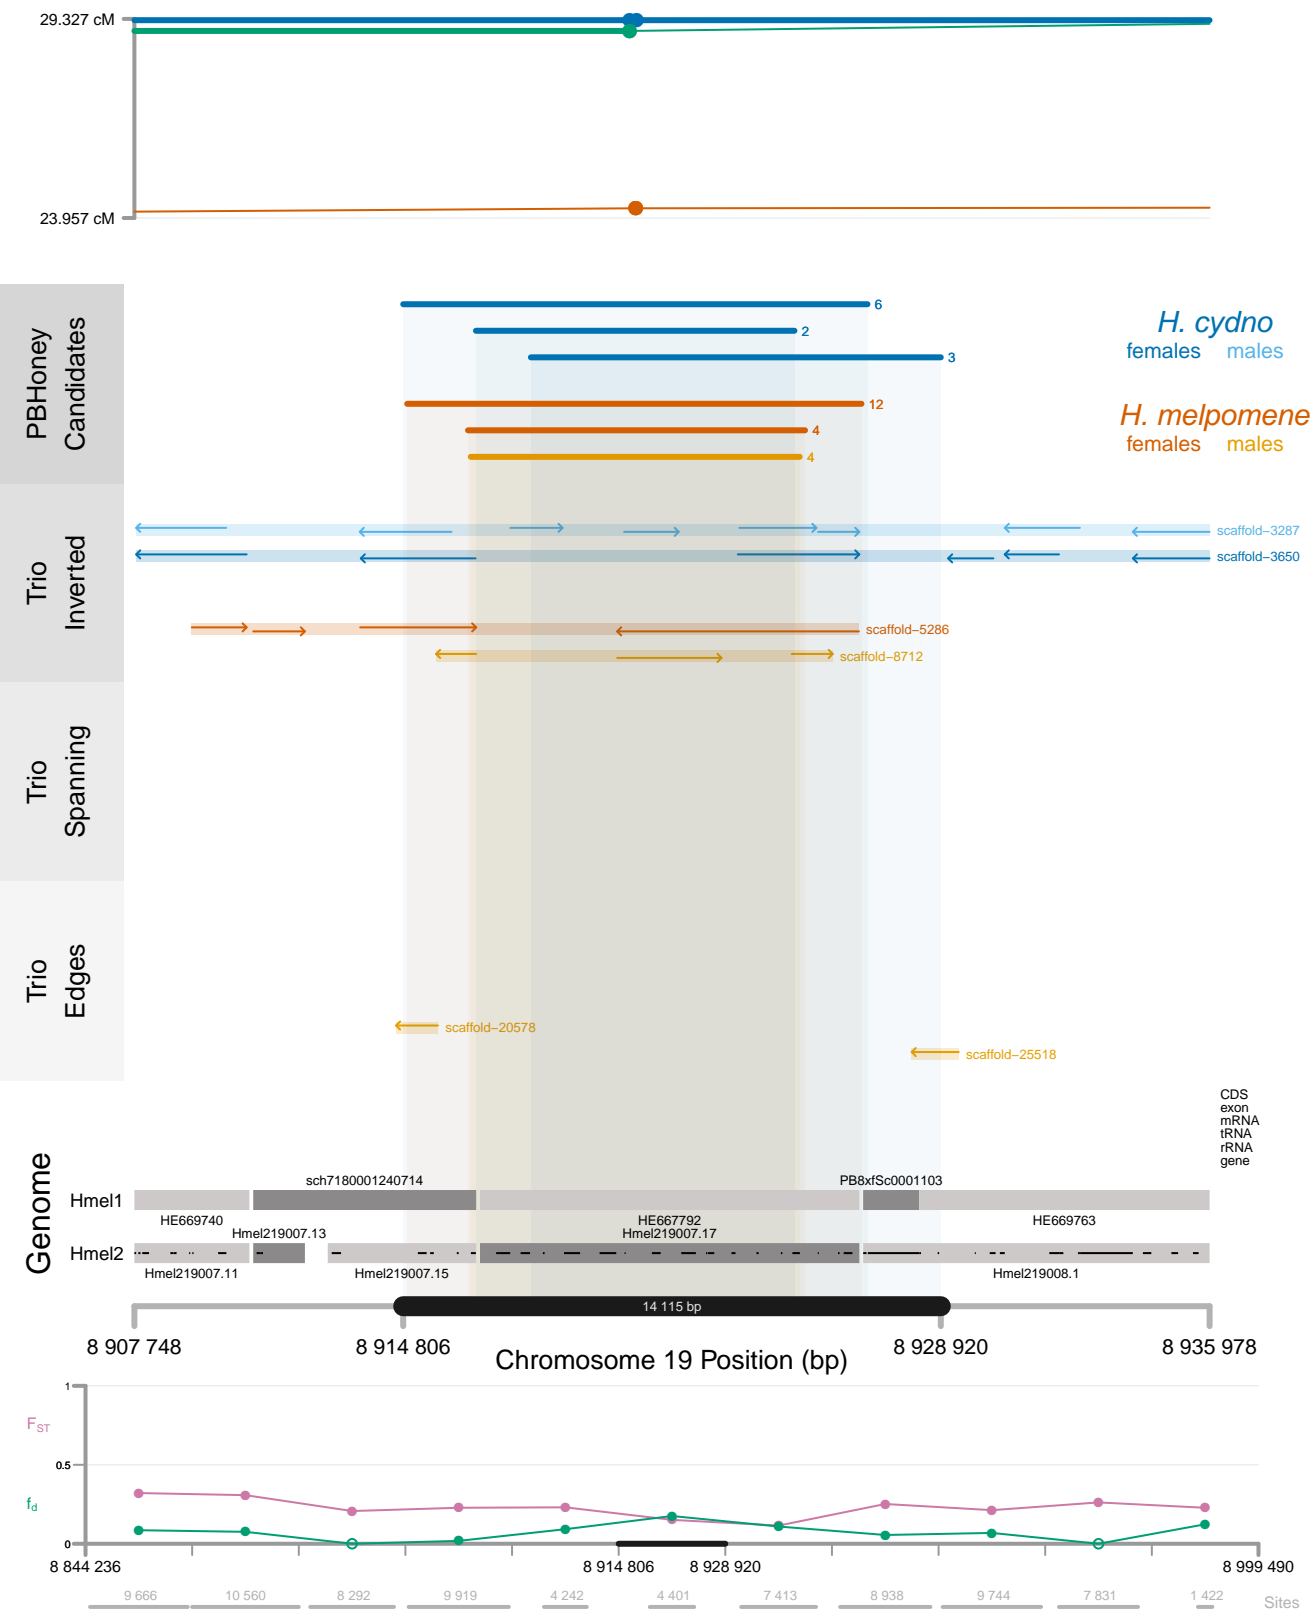

Figure S12.28

Both species

Split reads and trio assembly

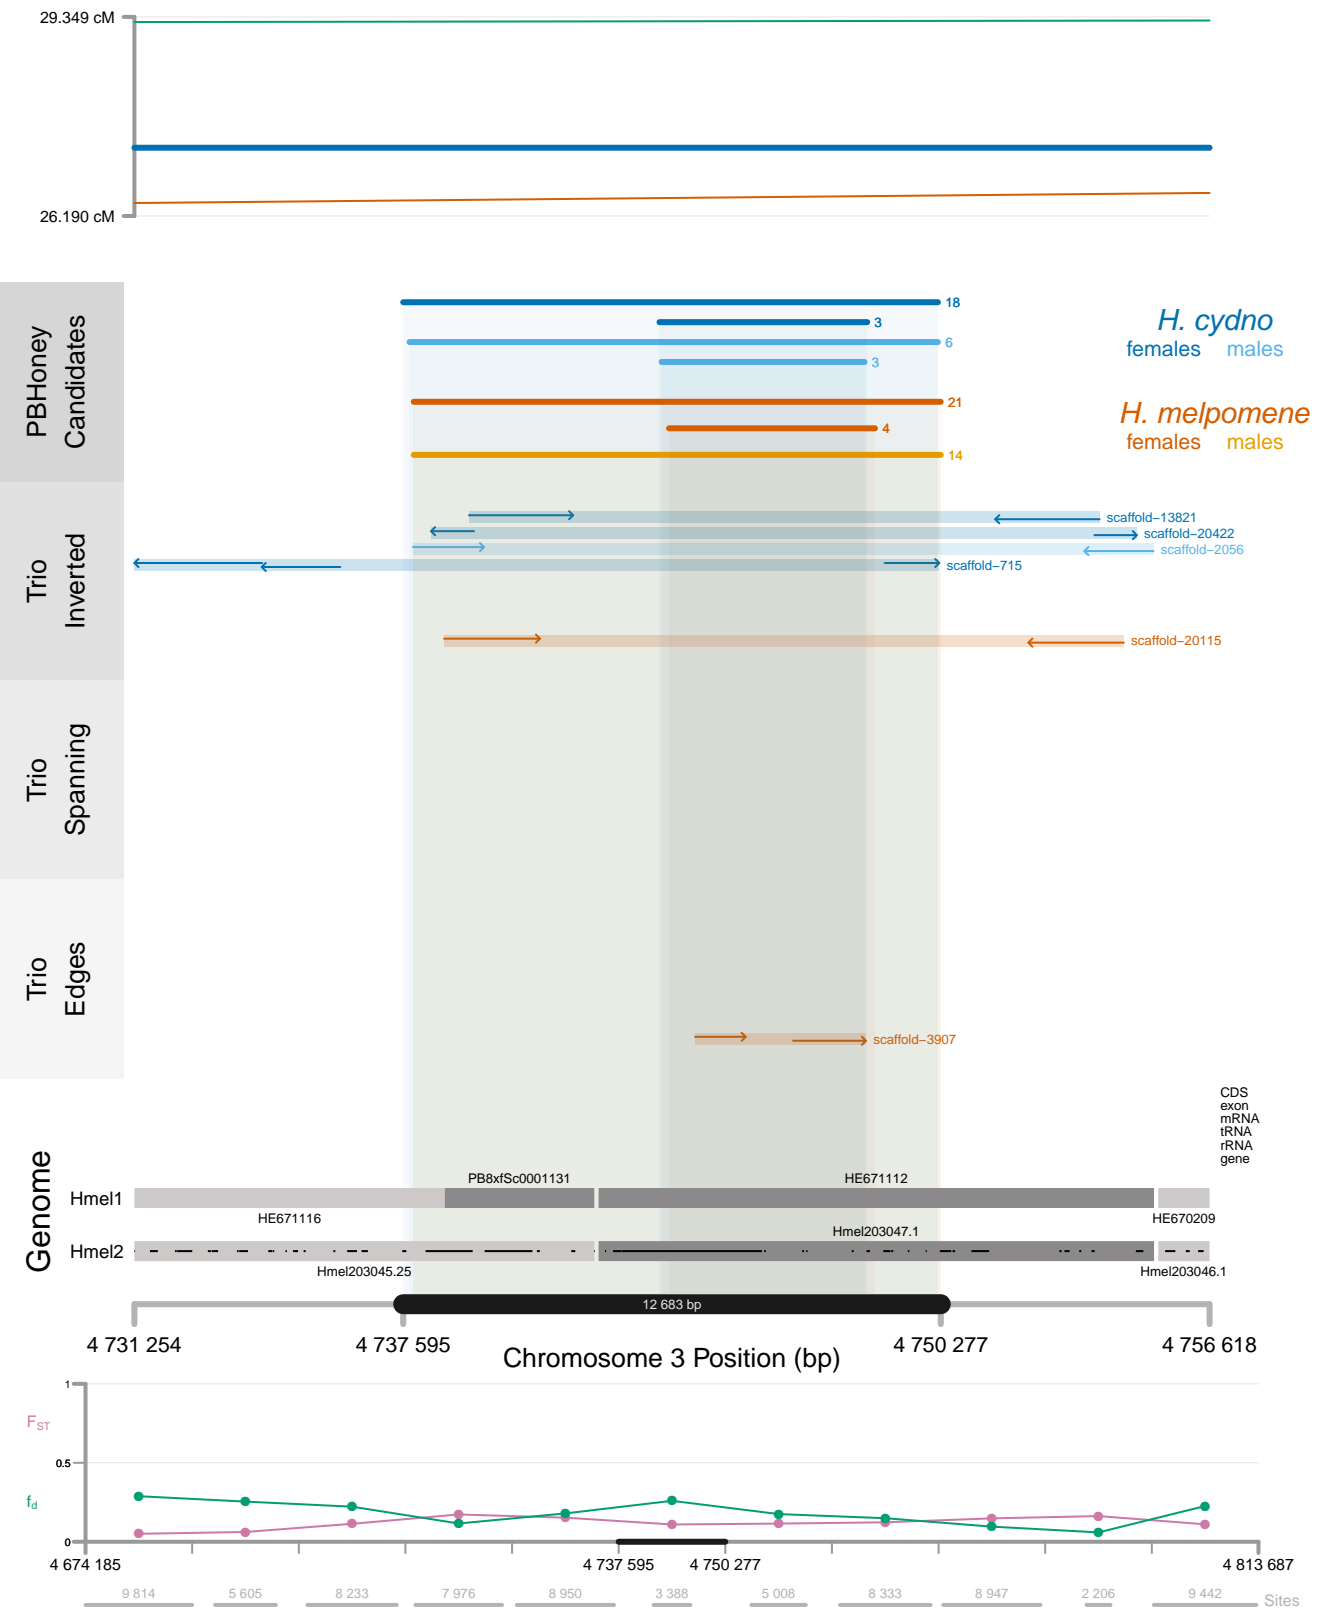

Figure S12.29

Both species

Split reads and trio assembly

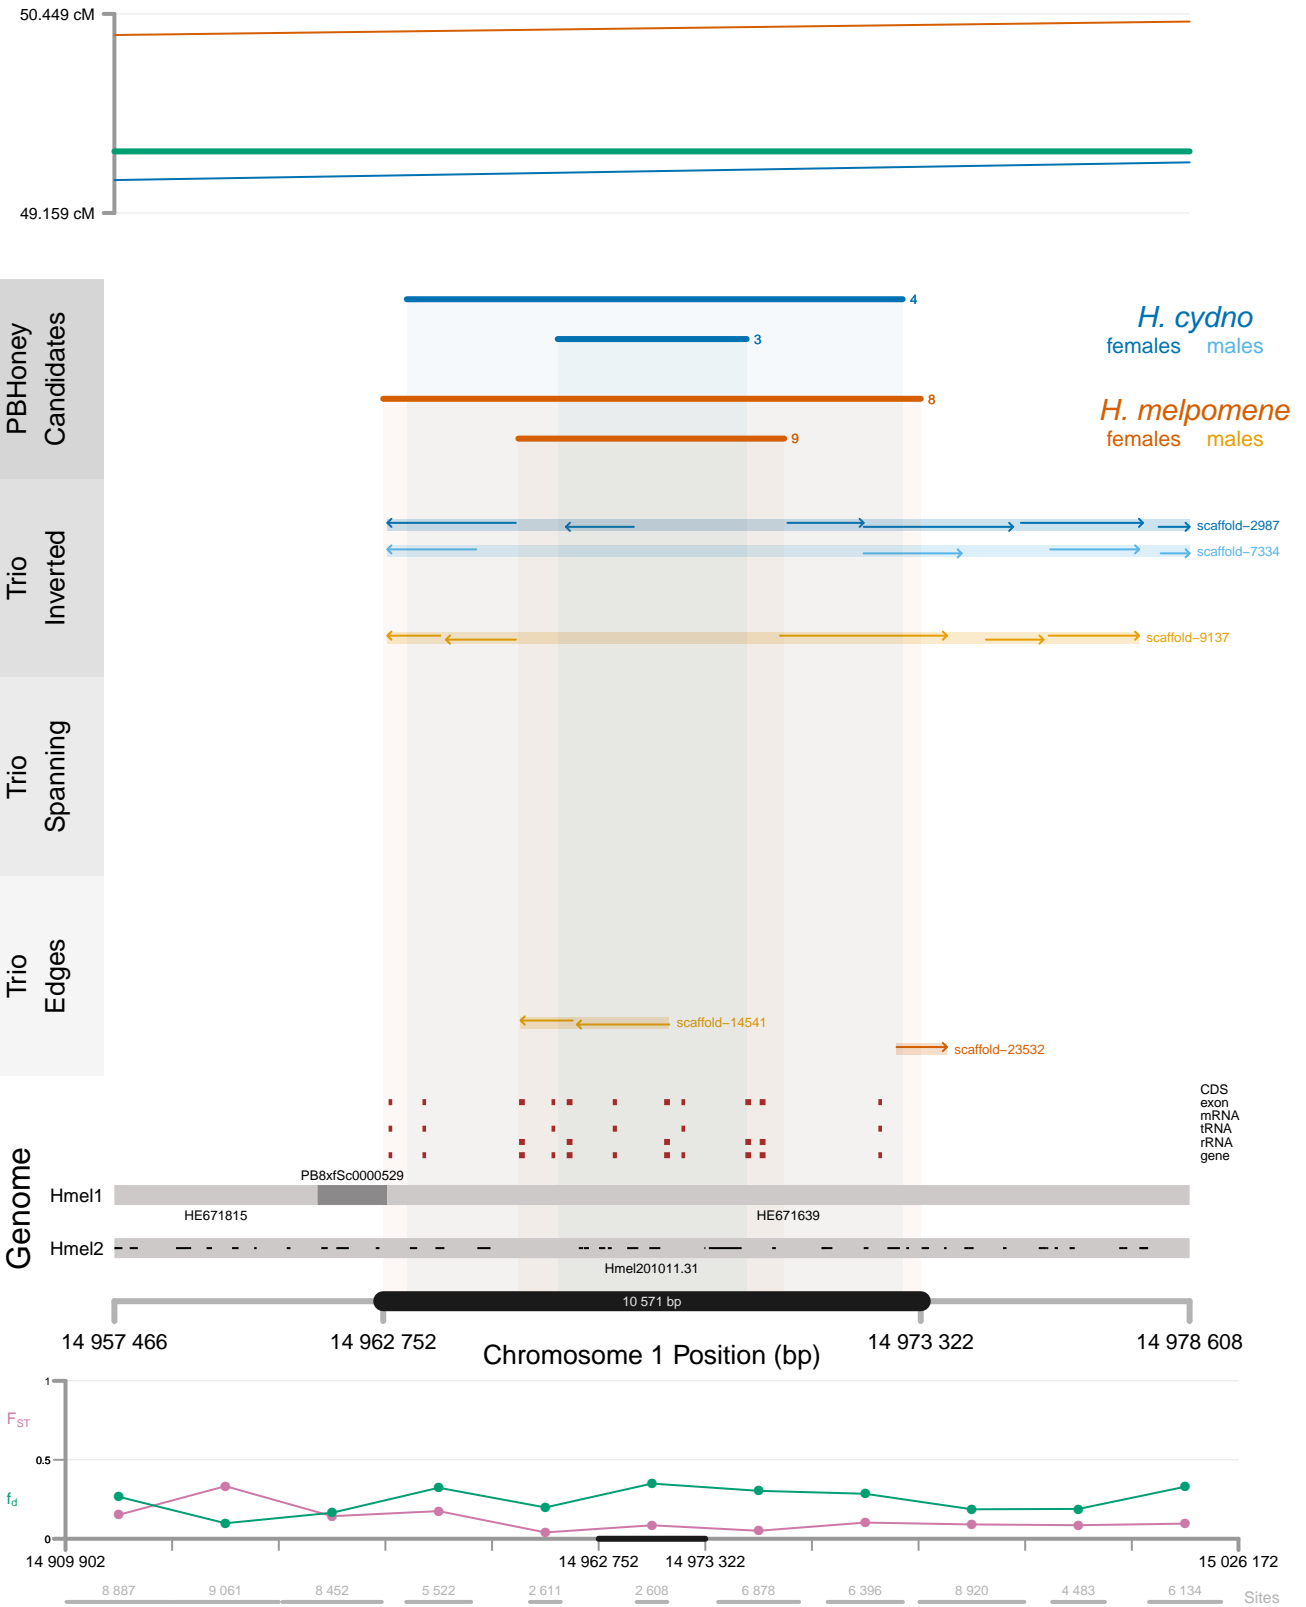

Figure S12.30

Both species

Split reads and trio assembly

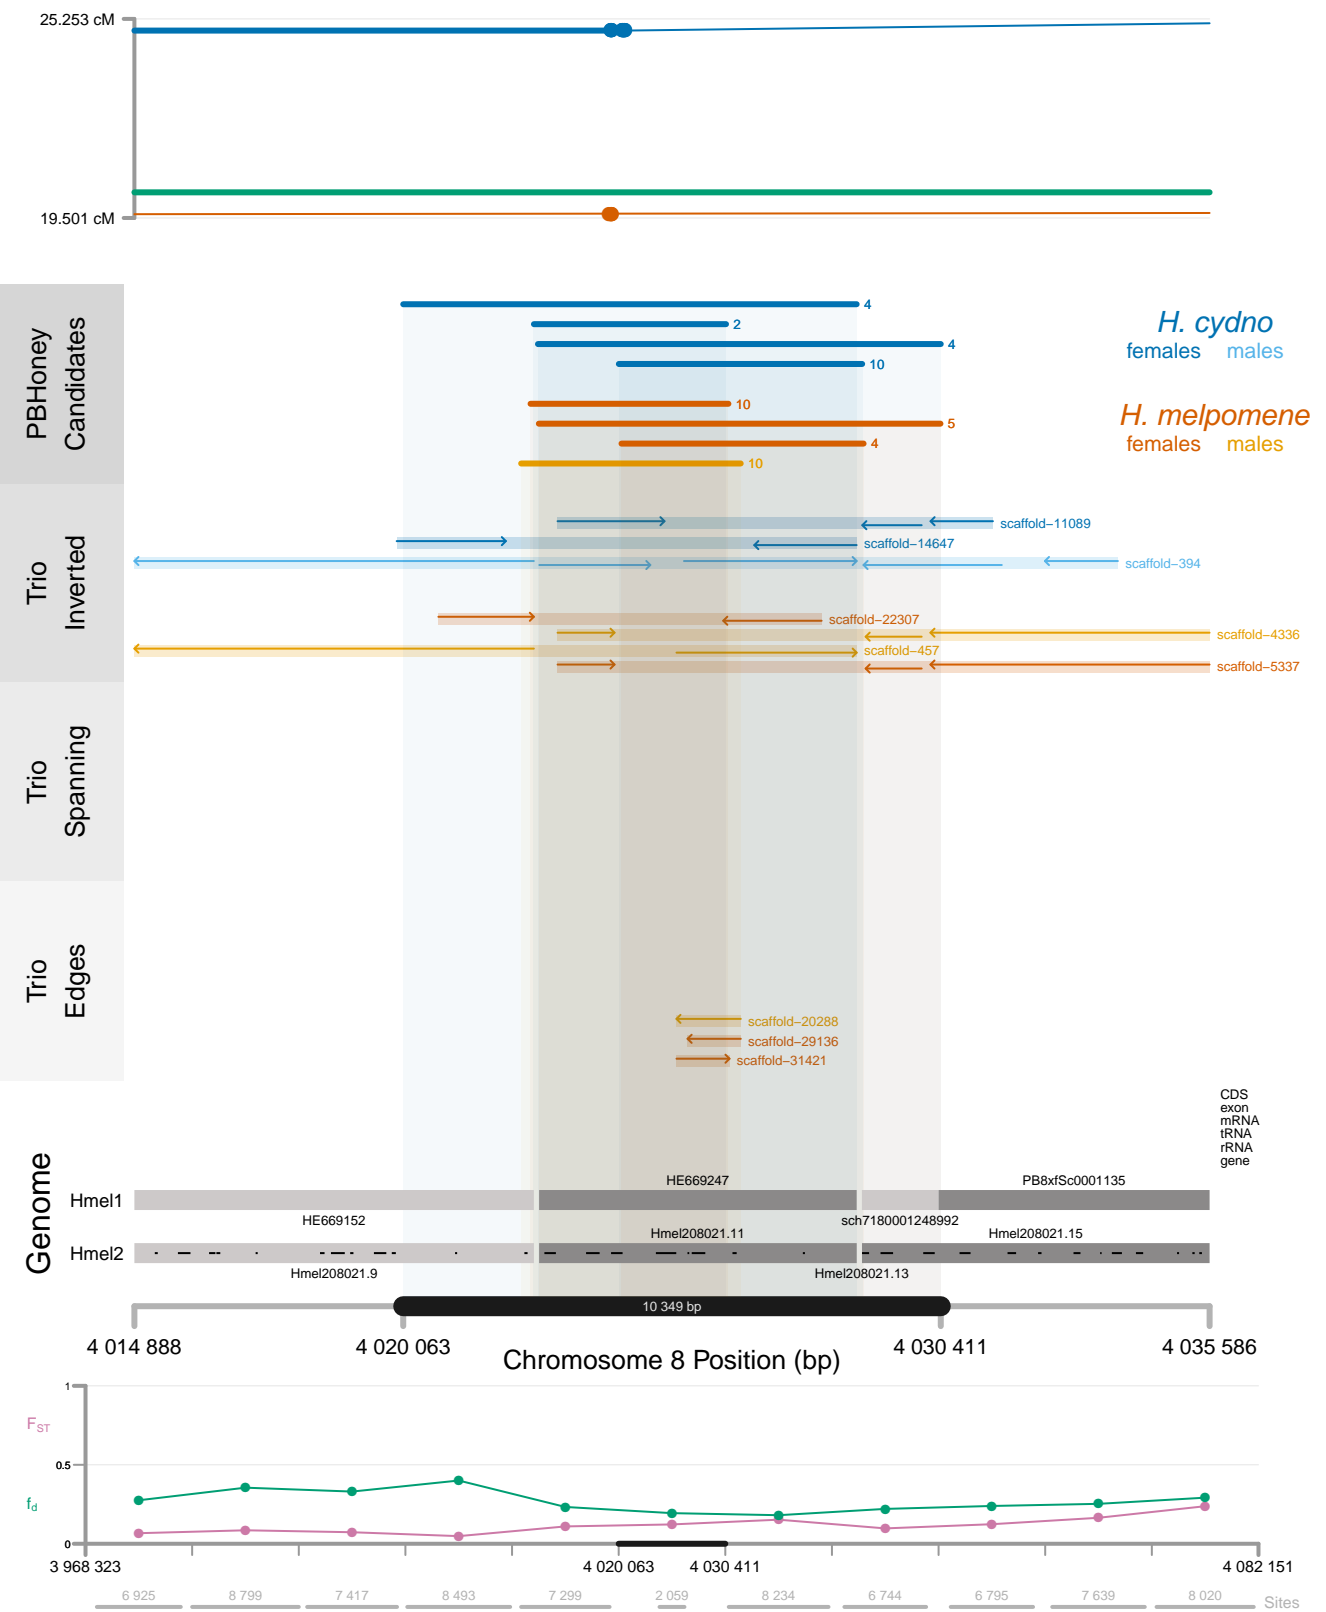

Figure S12.31

Both species

Split reads and trio assembly

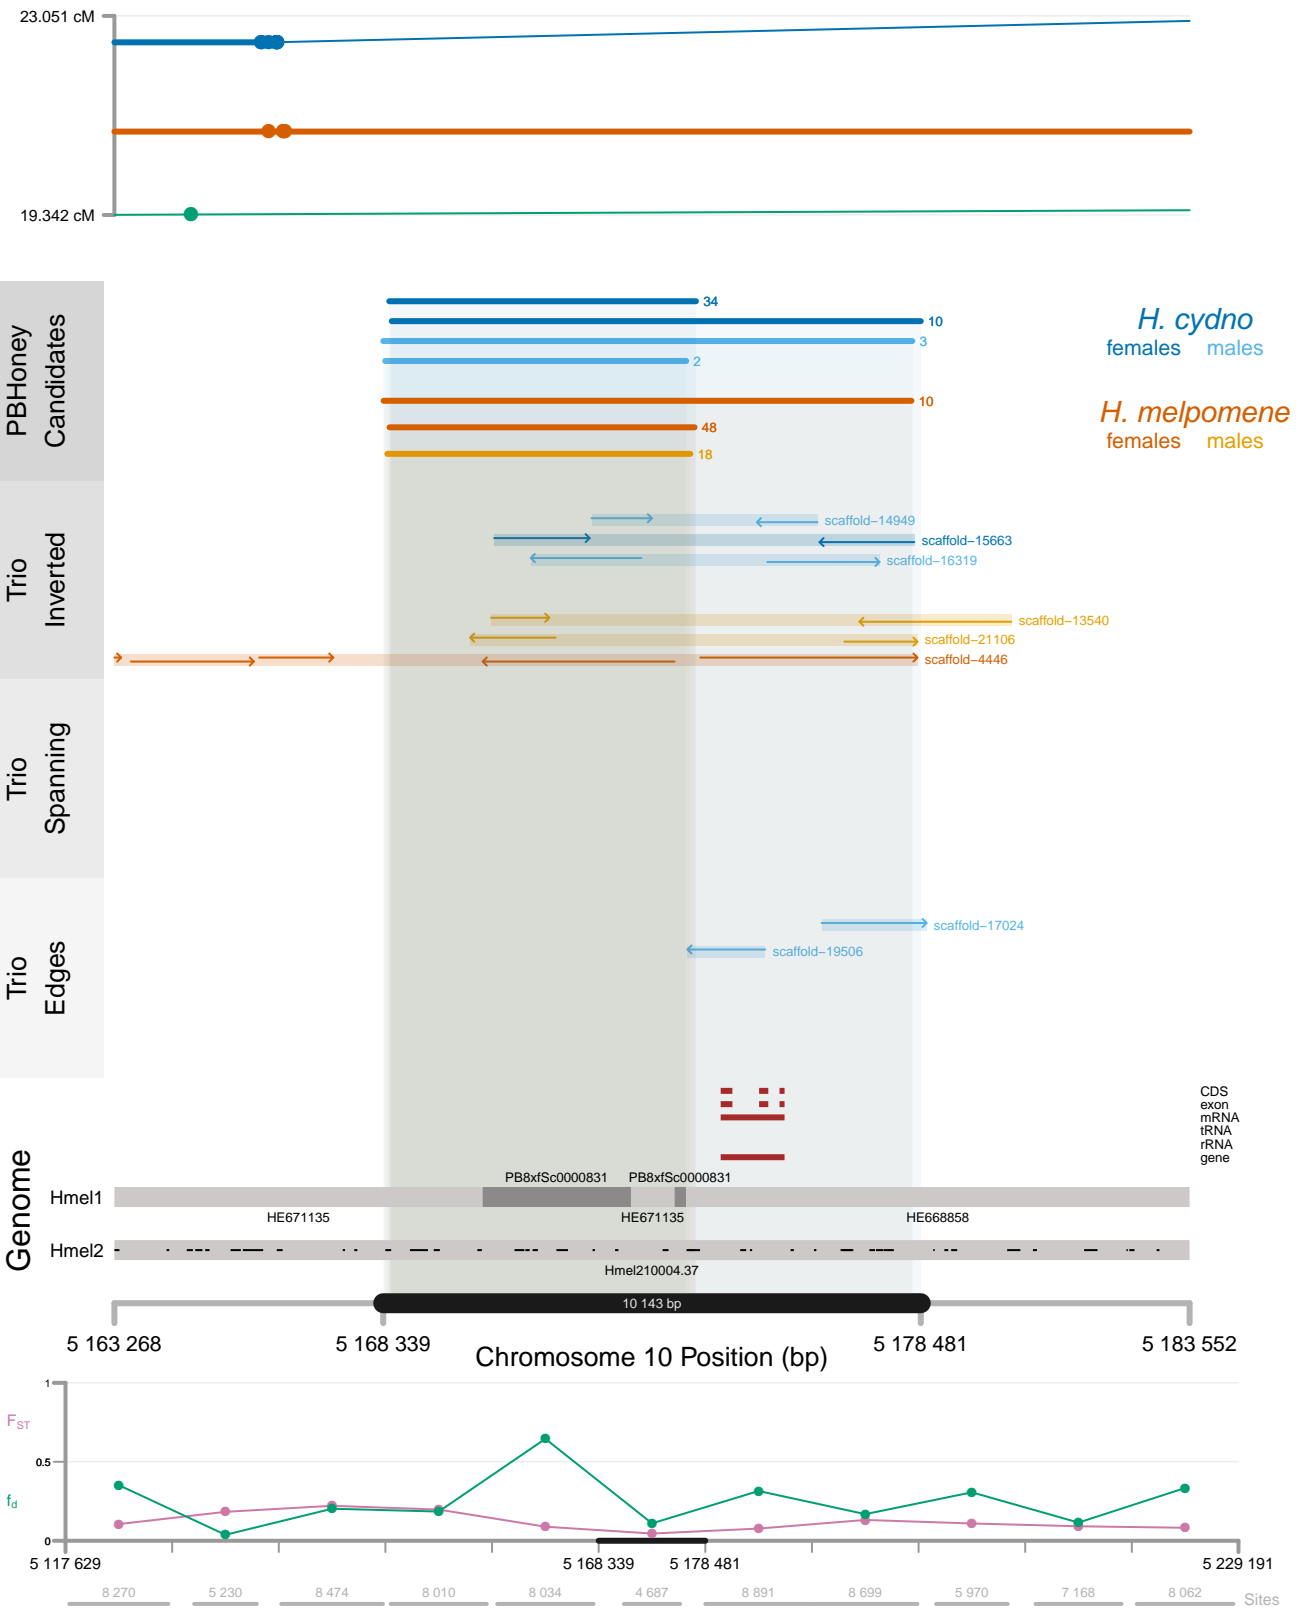

PBHoney Candidates

Trio Inverted

Trio Spanning

Trio Edges

Genome

*H. cydno*  
females males

*H. melpomene*  
females males

CDS  
exon  
mRNA  
tRNA  
rRNA  
gene

Chromosome 10 Position (bp)

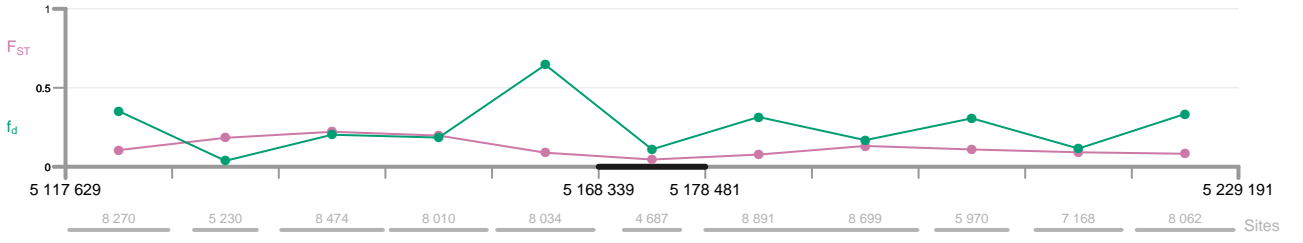

Figure S12.32

Both species

Split reads and trio assembly

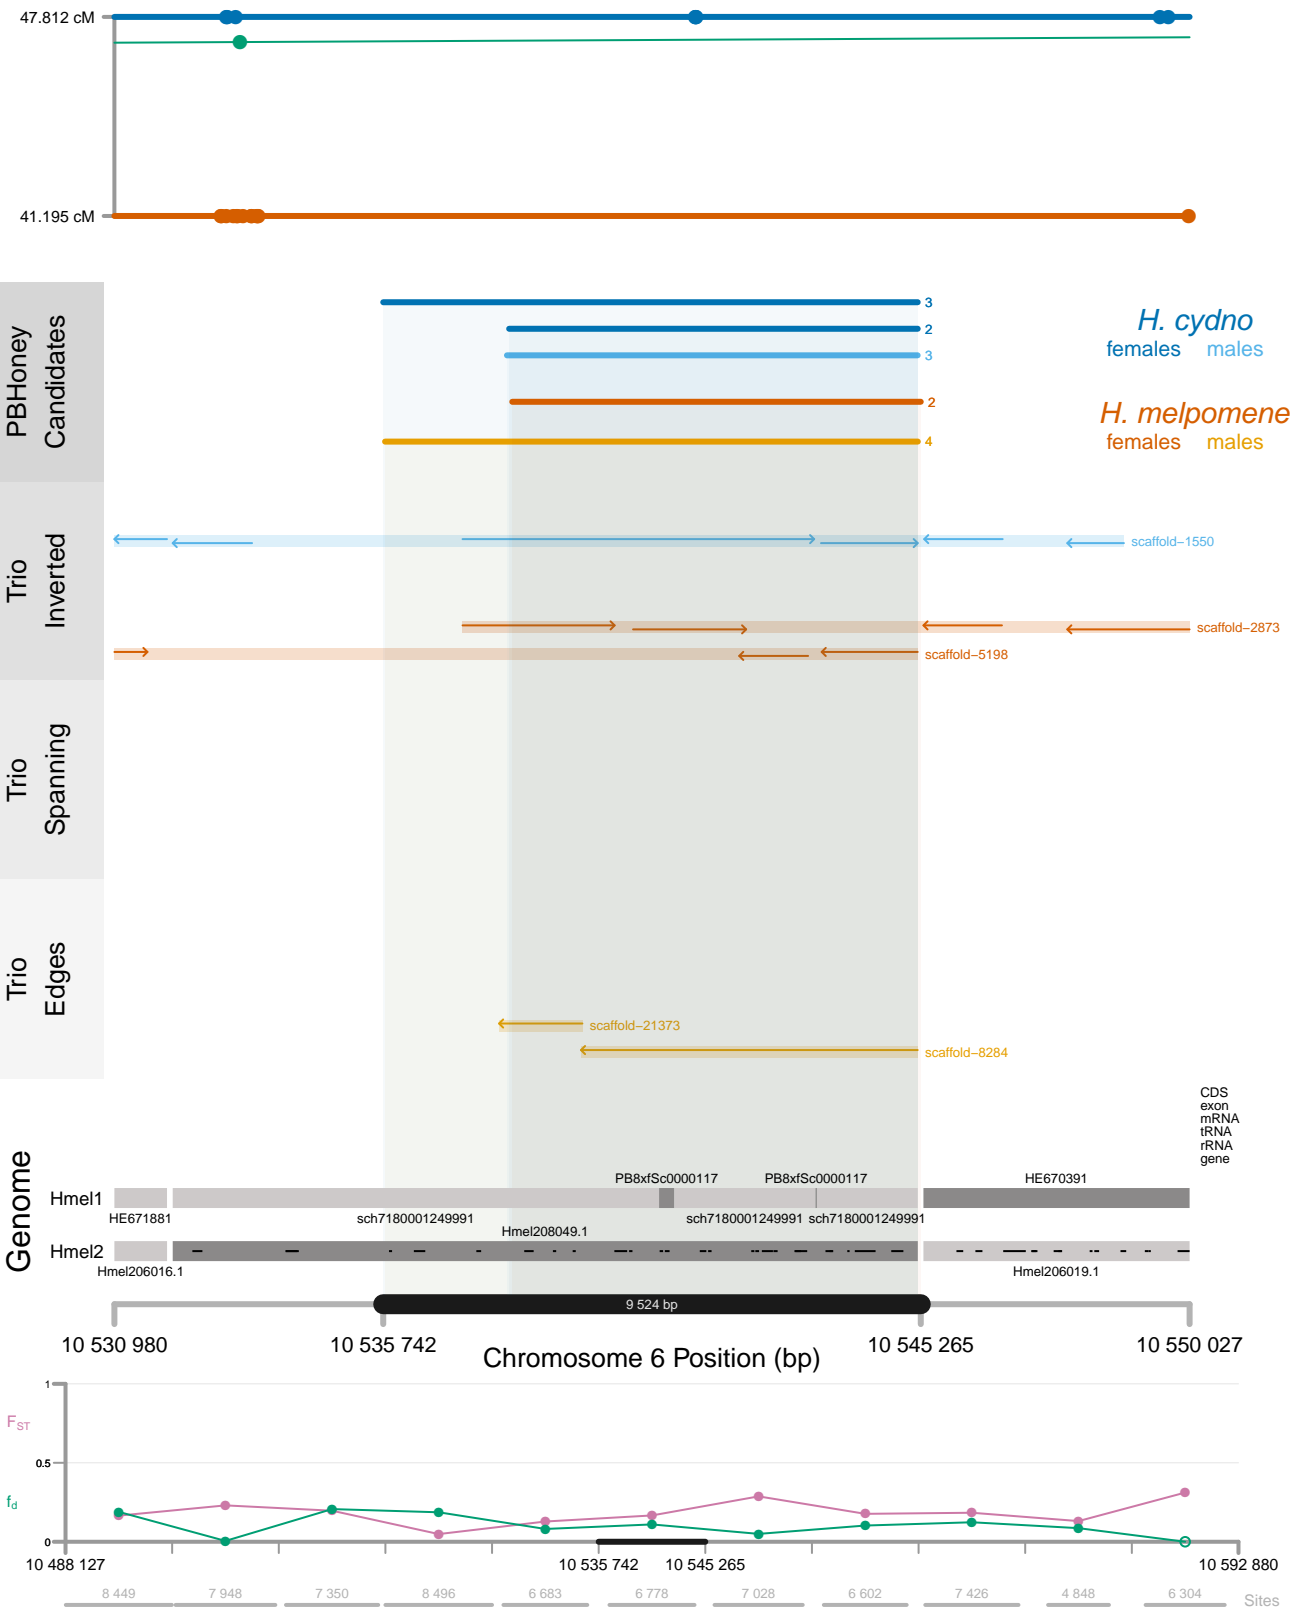



Figure S12.33

Both species

Split reads and trio assembly

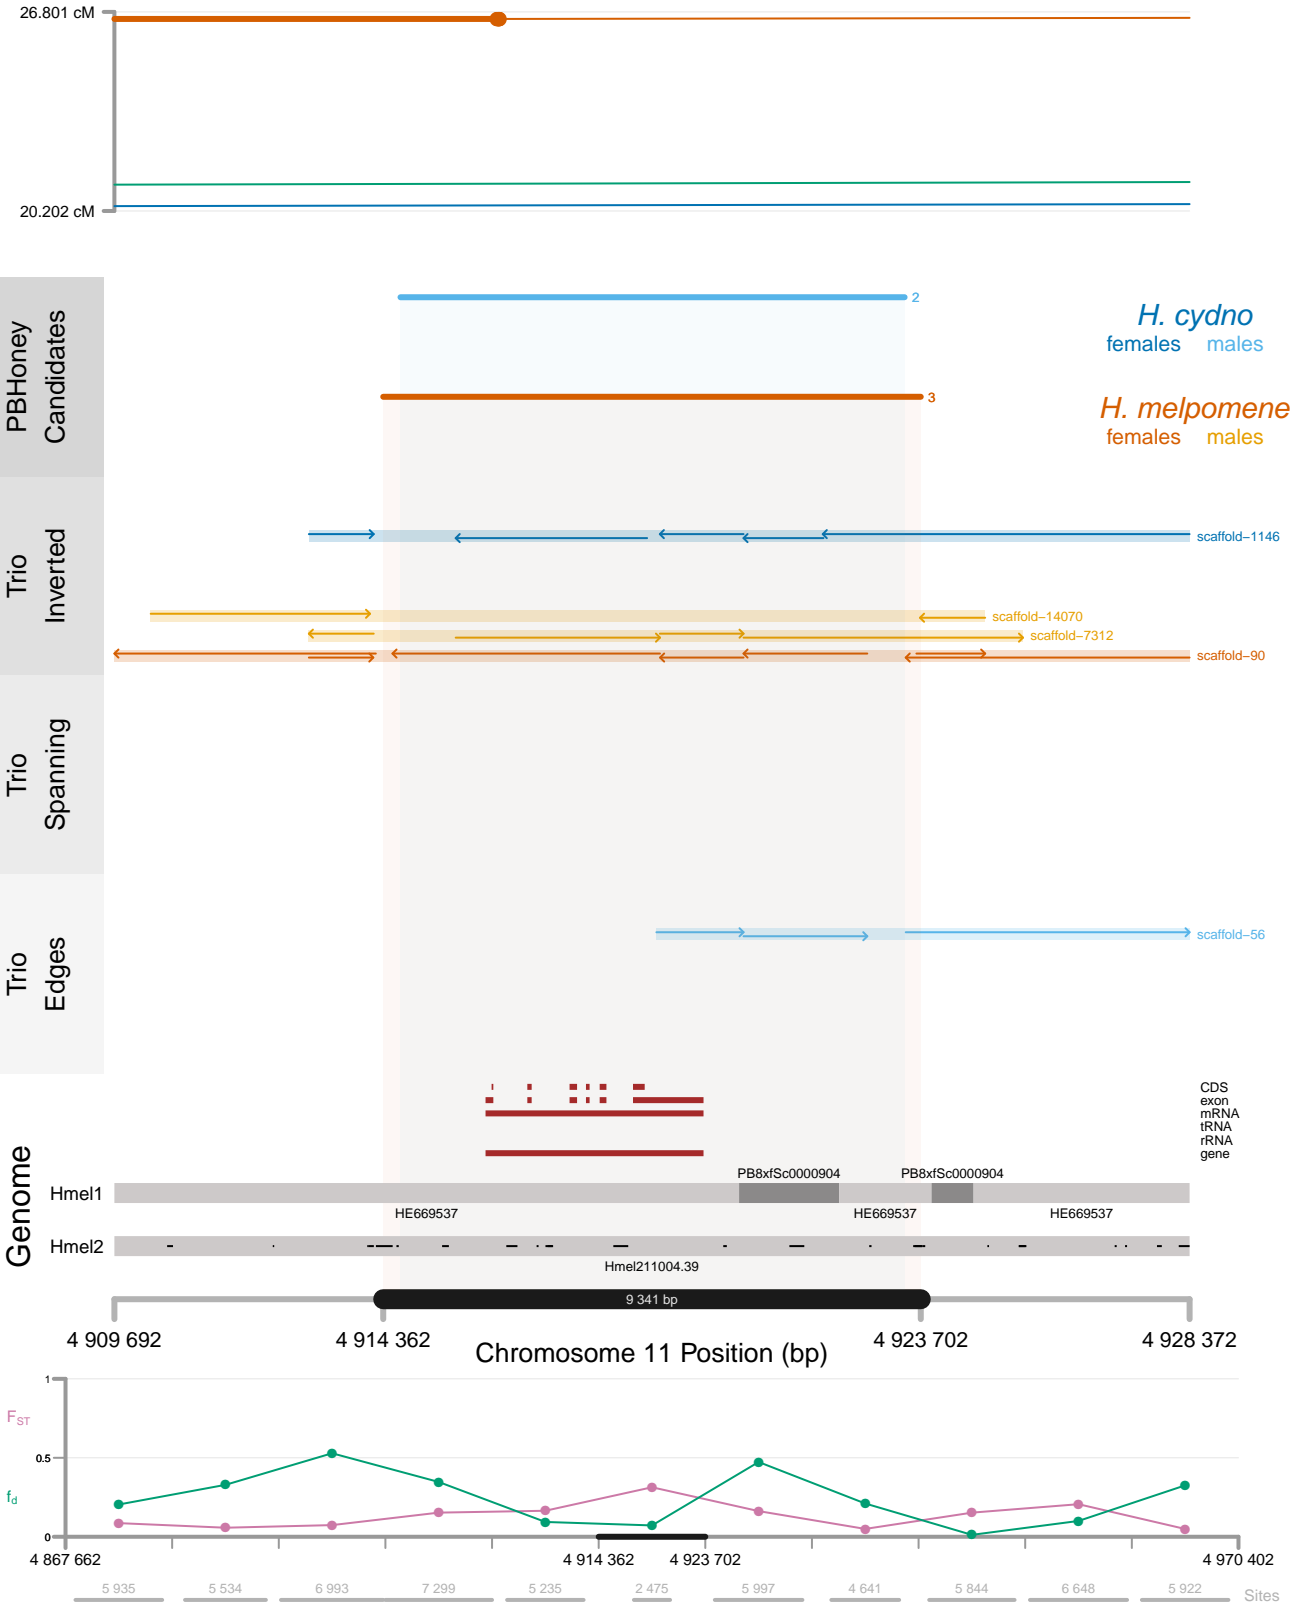

Figure S12.34

Both species

Split reads and trio assembly

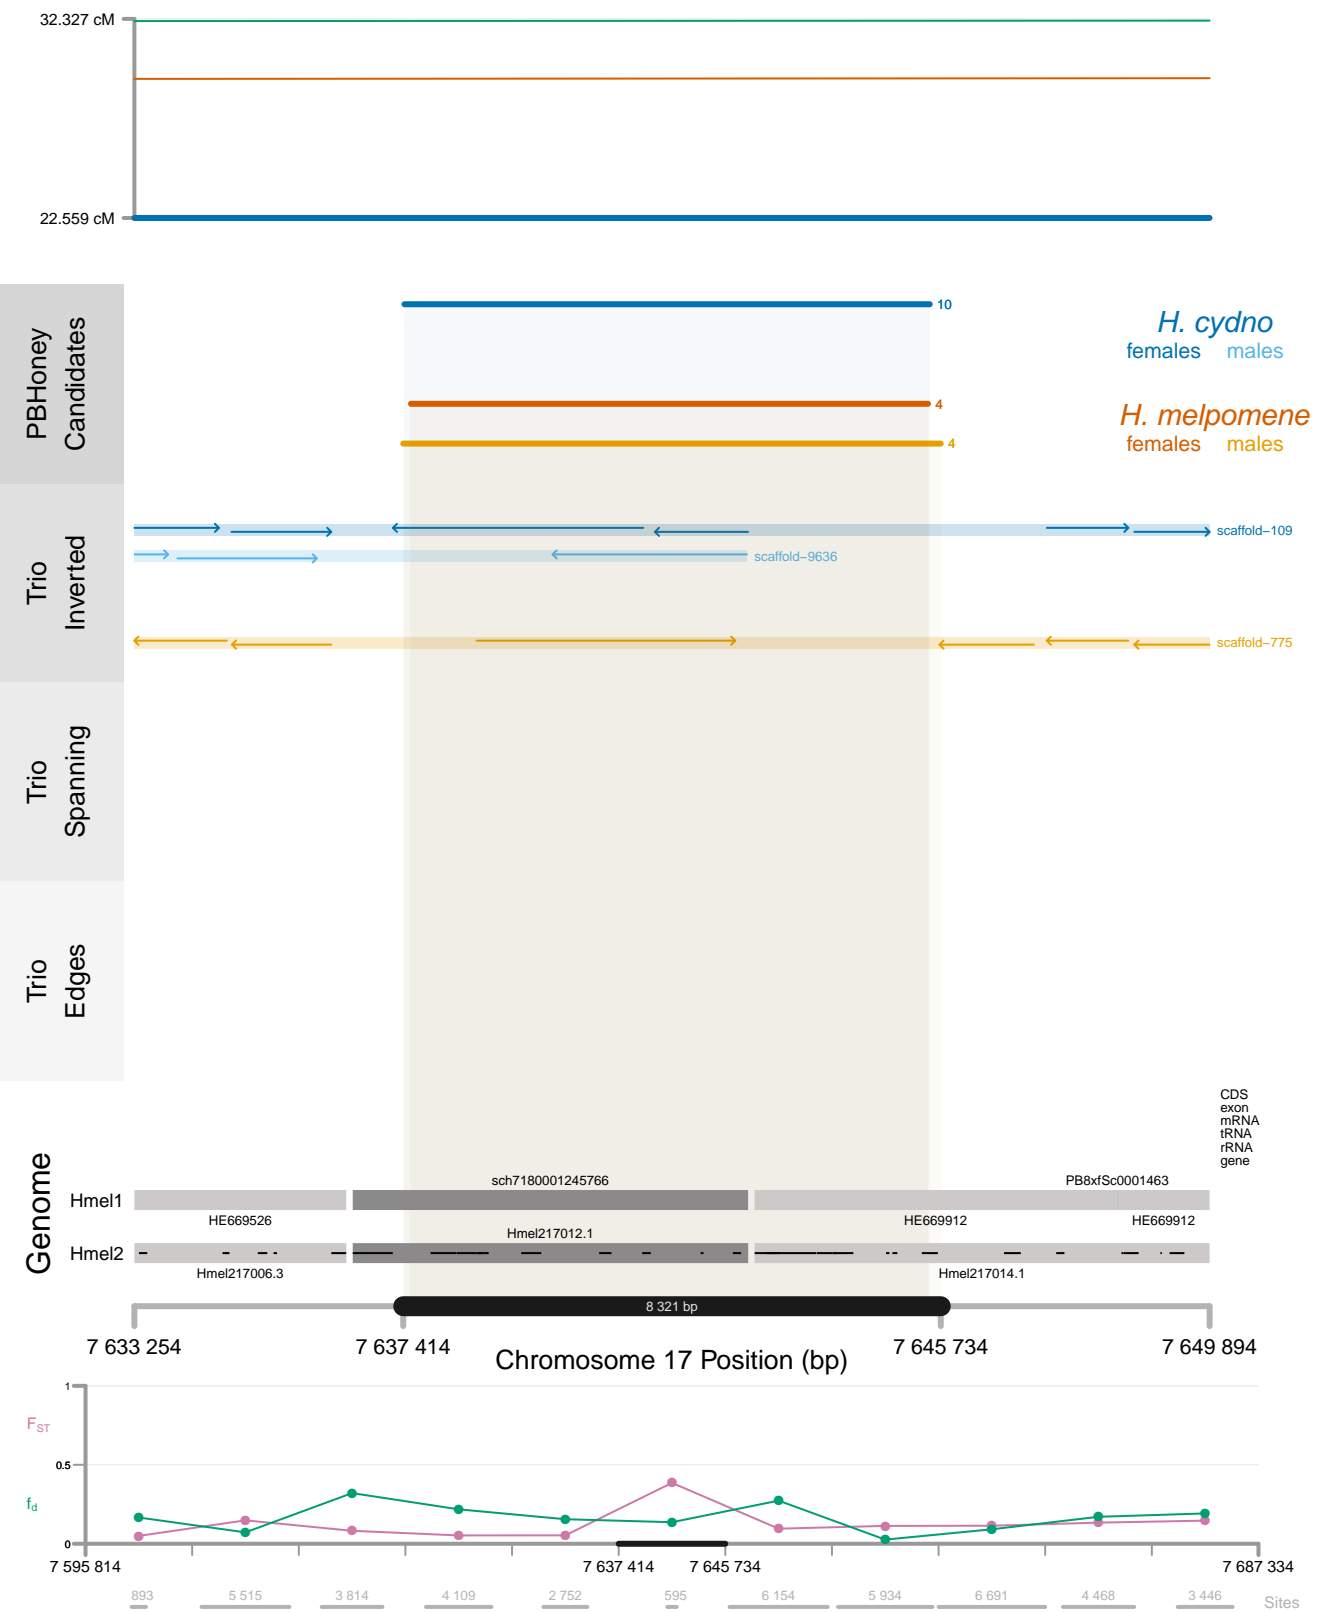

Figure S12.35

Both species

Split reads and trio assembly

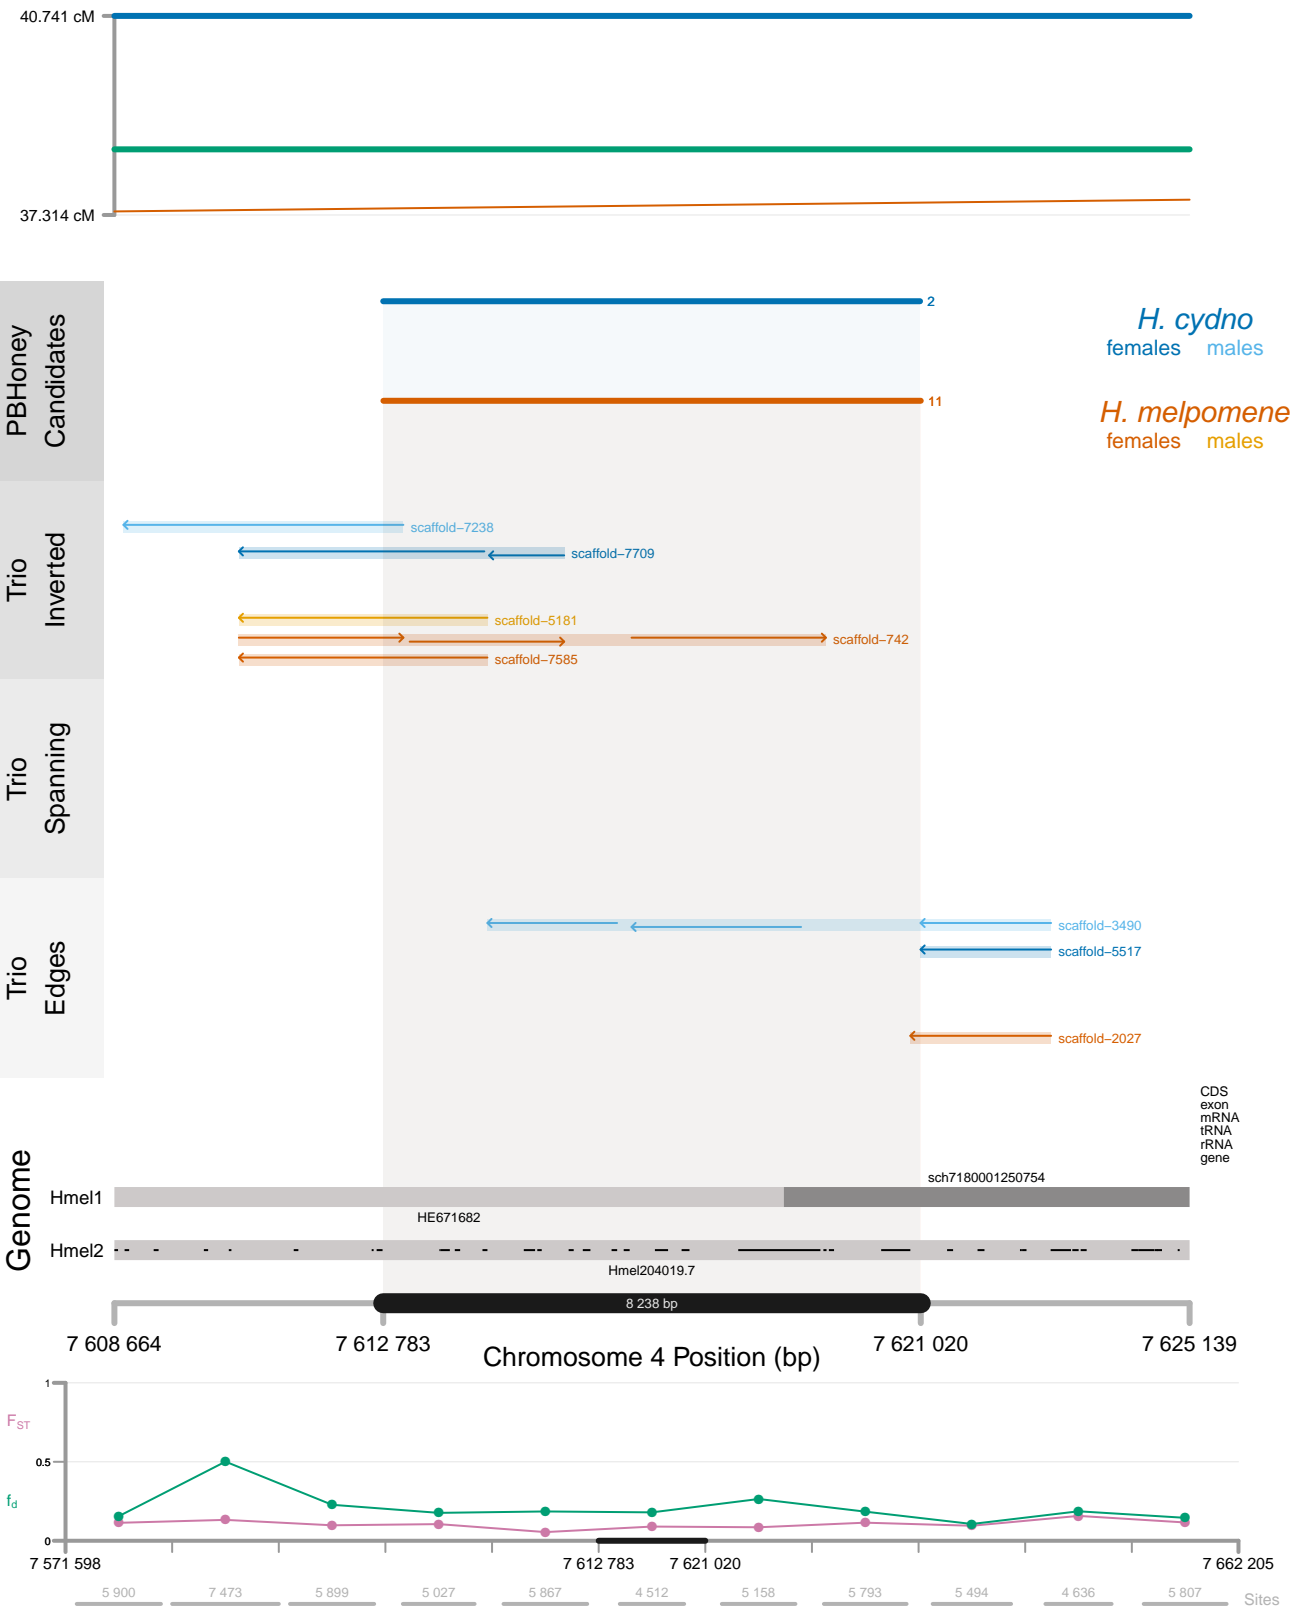

*H. cydno*  
females males

*H. melpomene*  
females males

CDS  
exon  
mRNA  
tRNA  
rRNA  
gene

Chromosome 4 Position (bp)

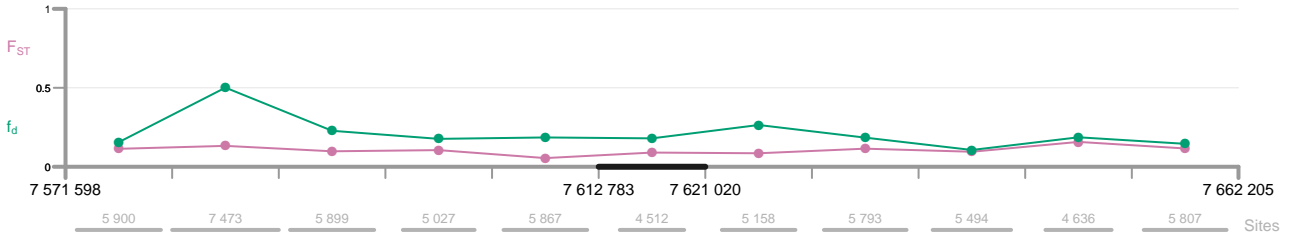

Figure S12.36

Both species

Split reads and trio assembly

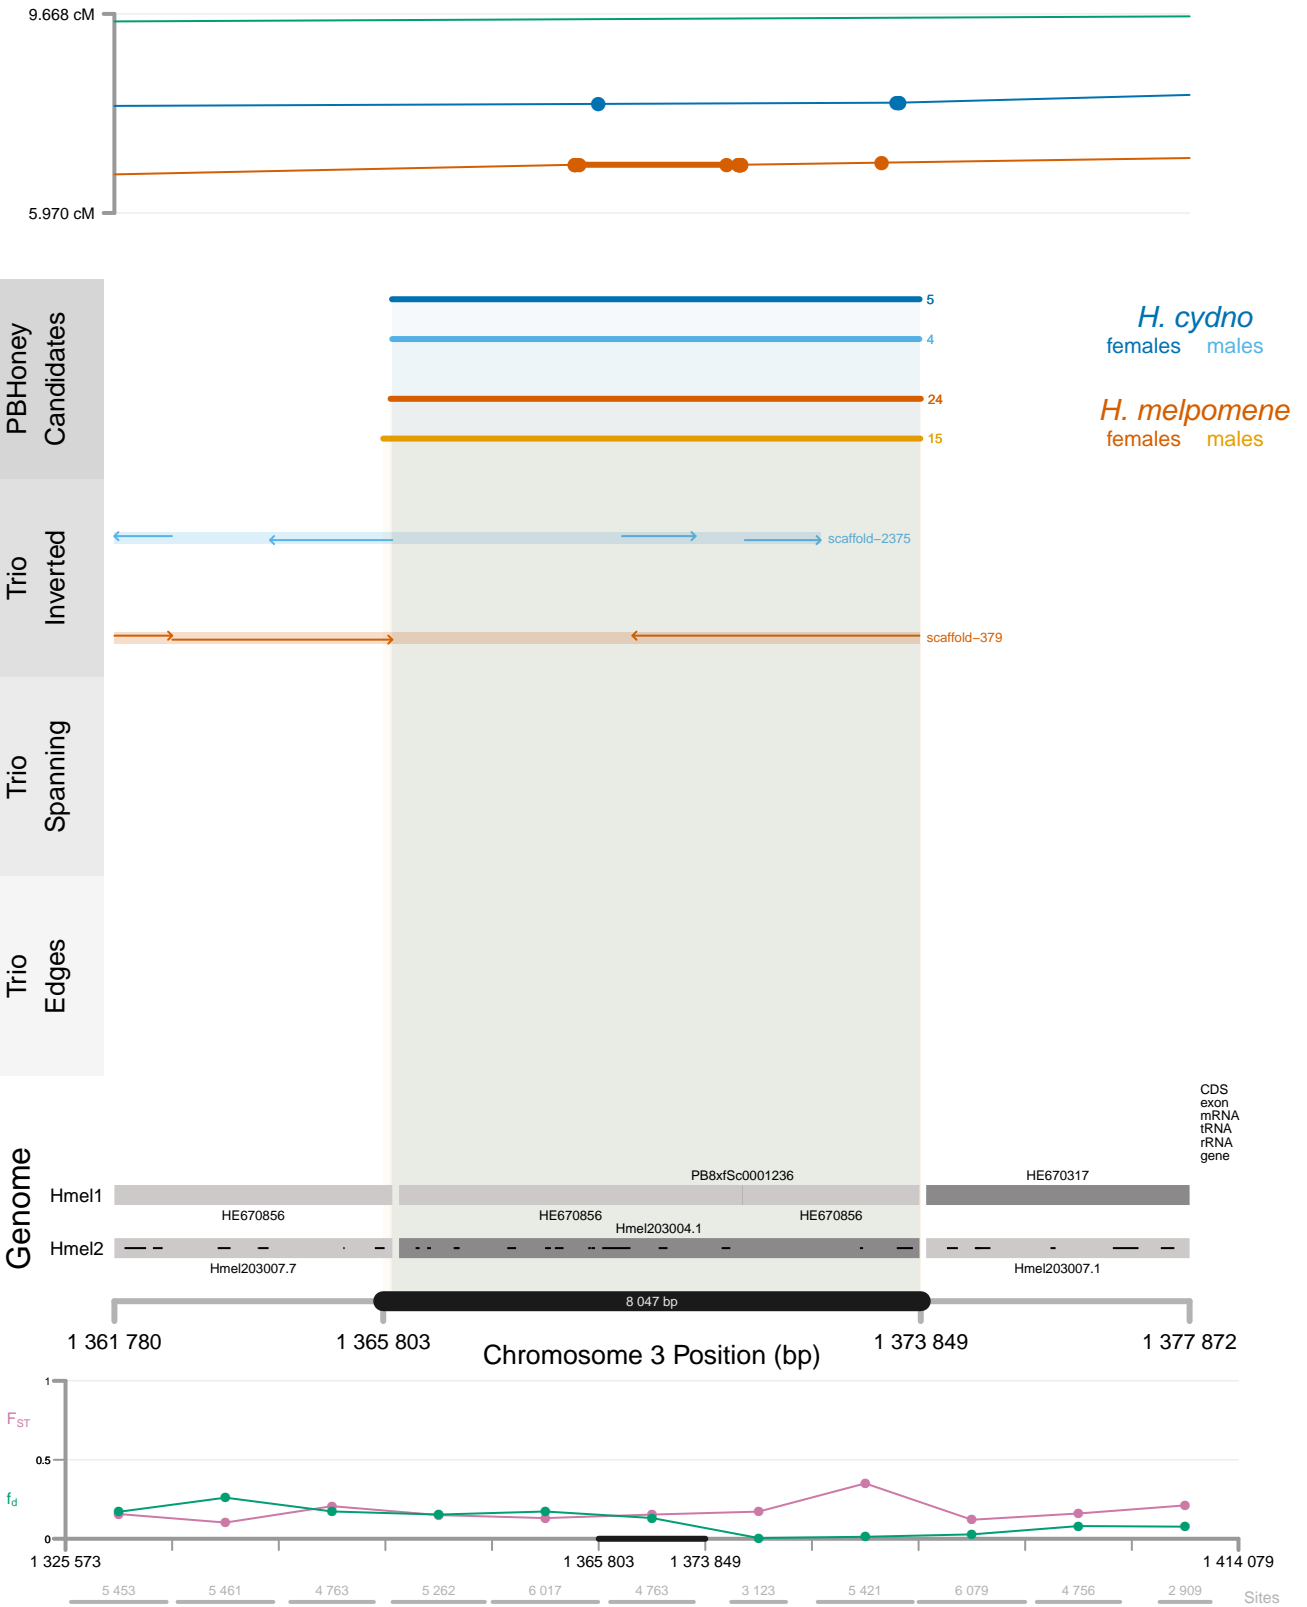

Figure S12.37

Both species

Split reads and trio assembly

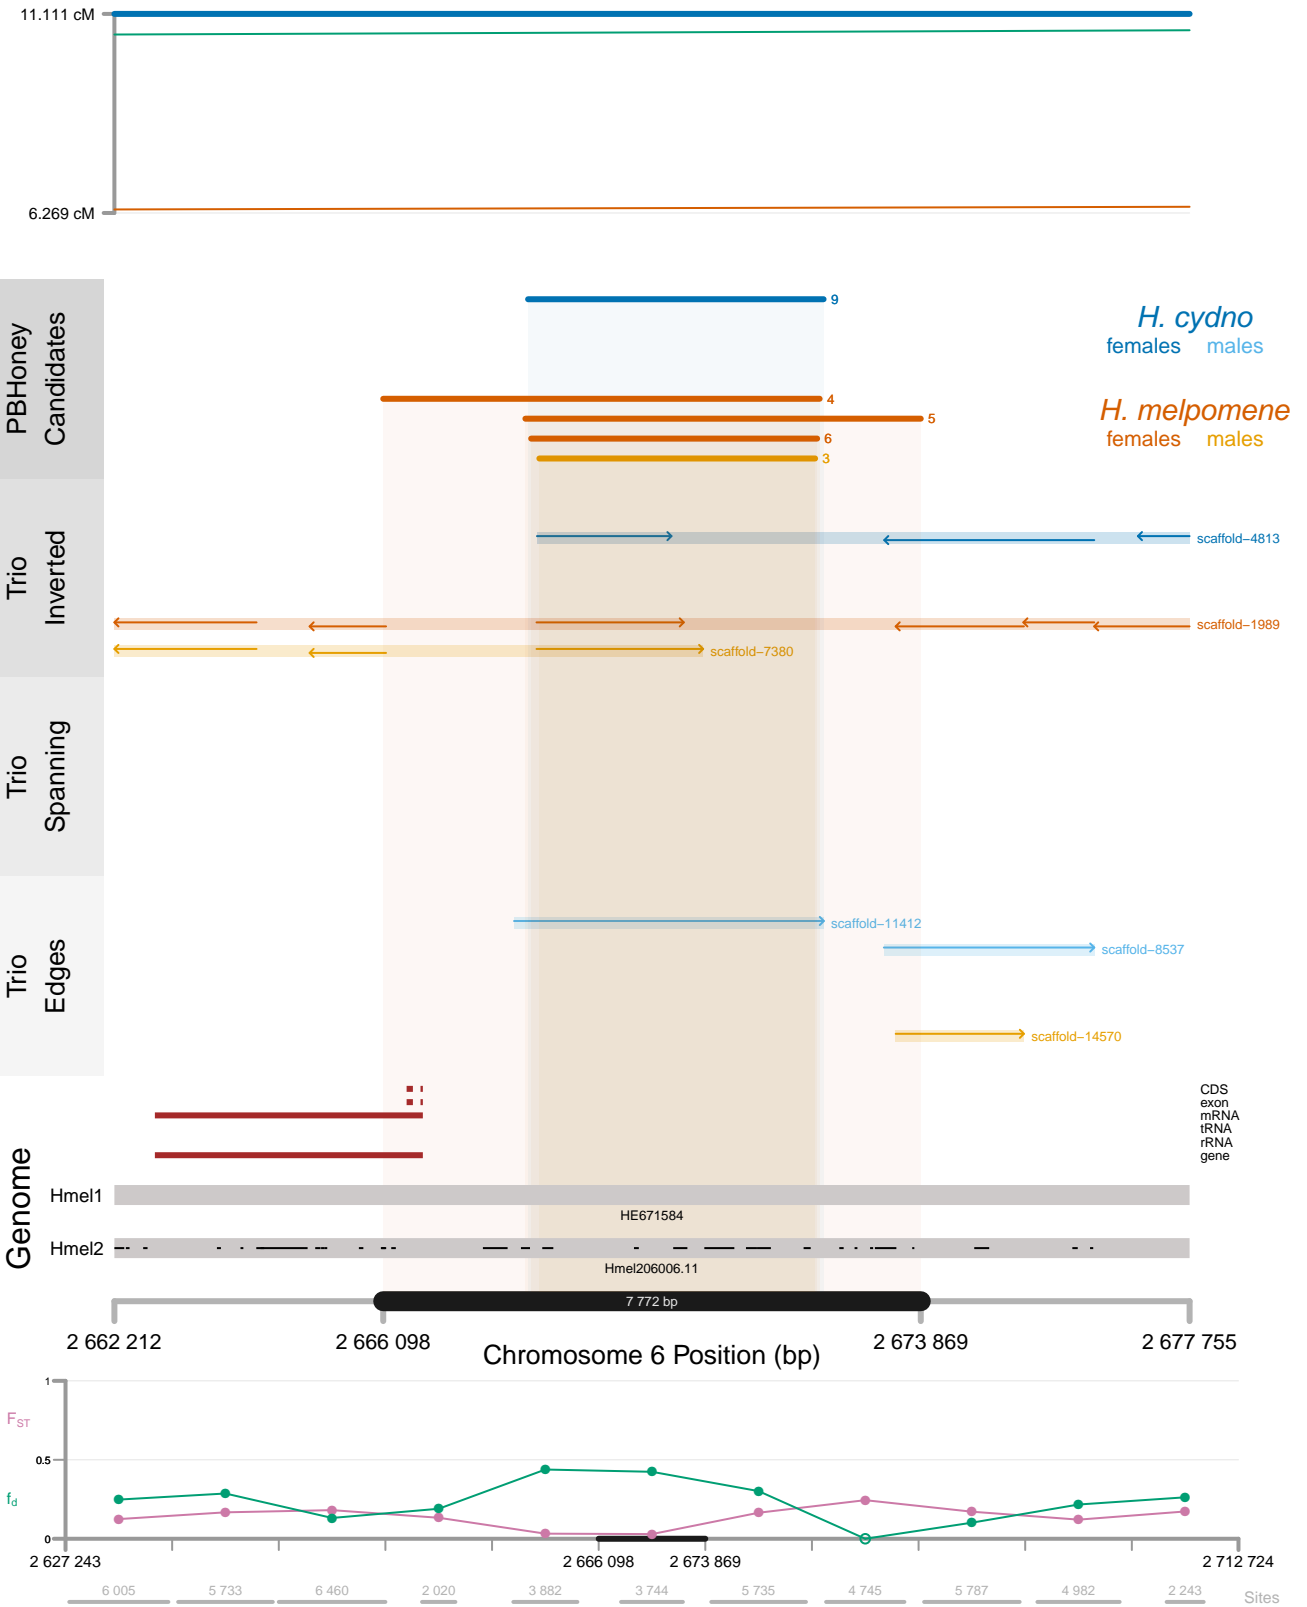

Figure S12.38

Both species

Split reads and trio assembly

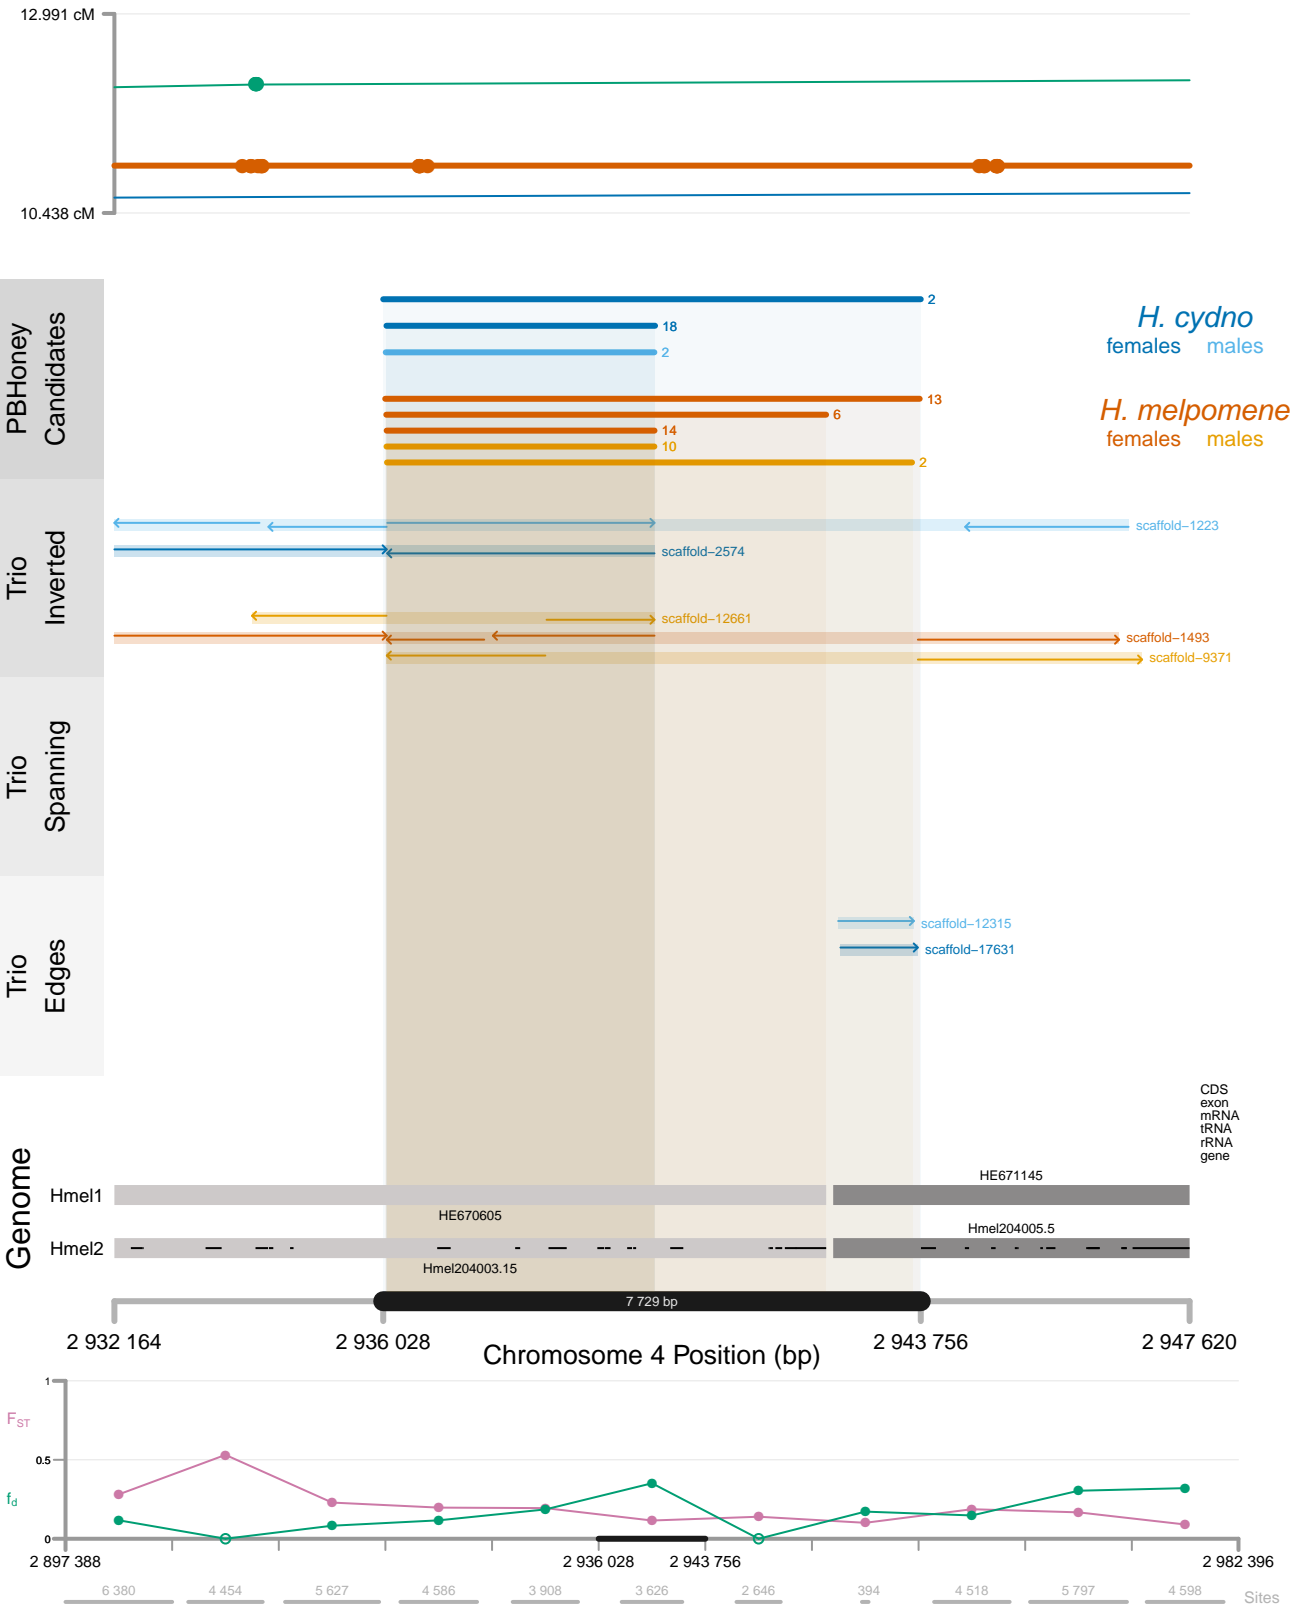

Figure S12.39

Both species

Split reads and trio assembly

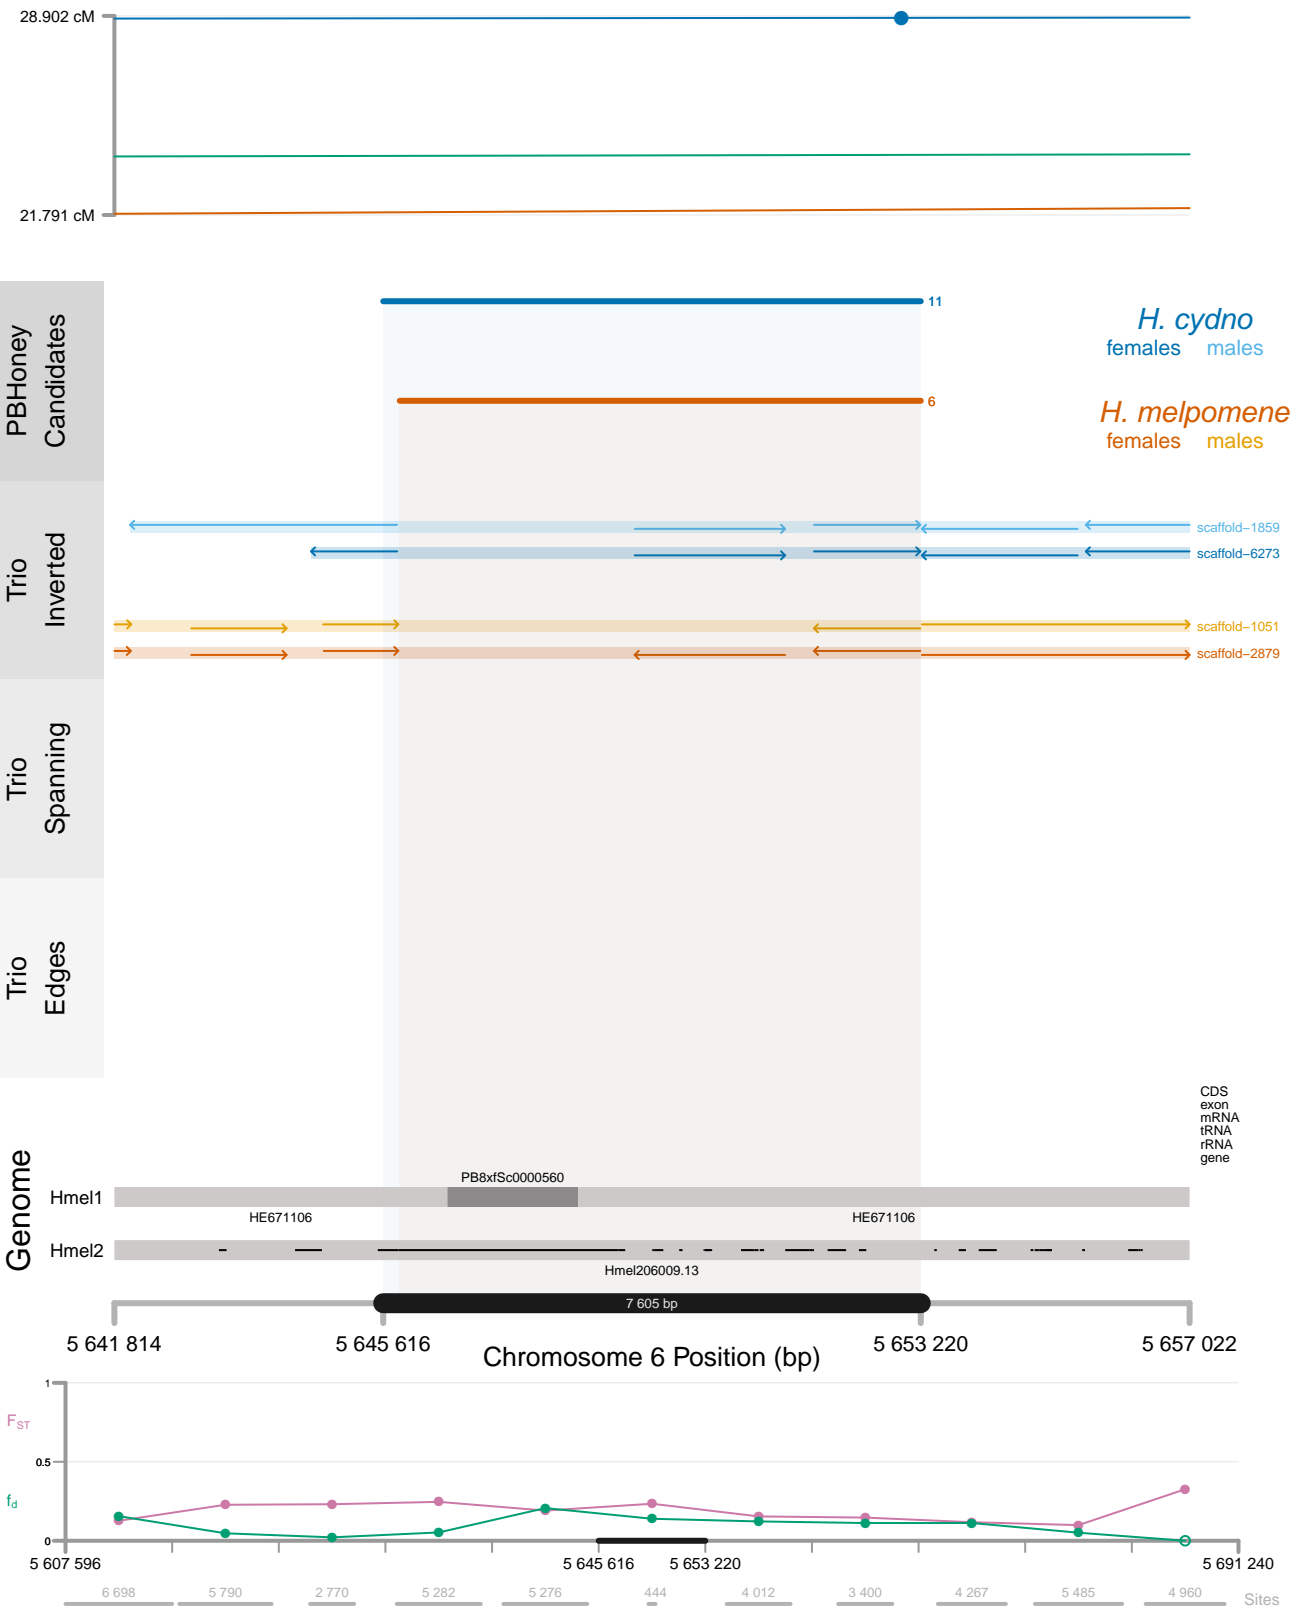

Figure S12.40

Both species

Split reads and trio assembly

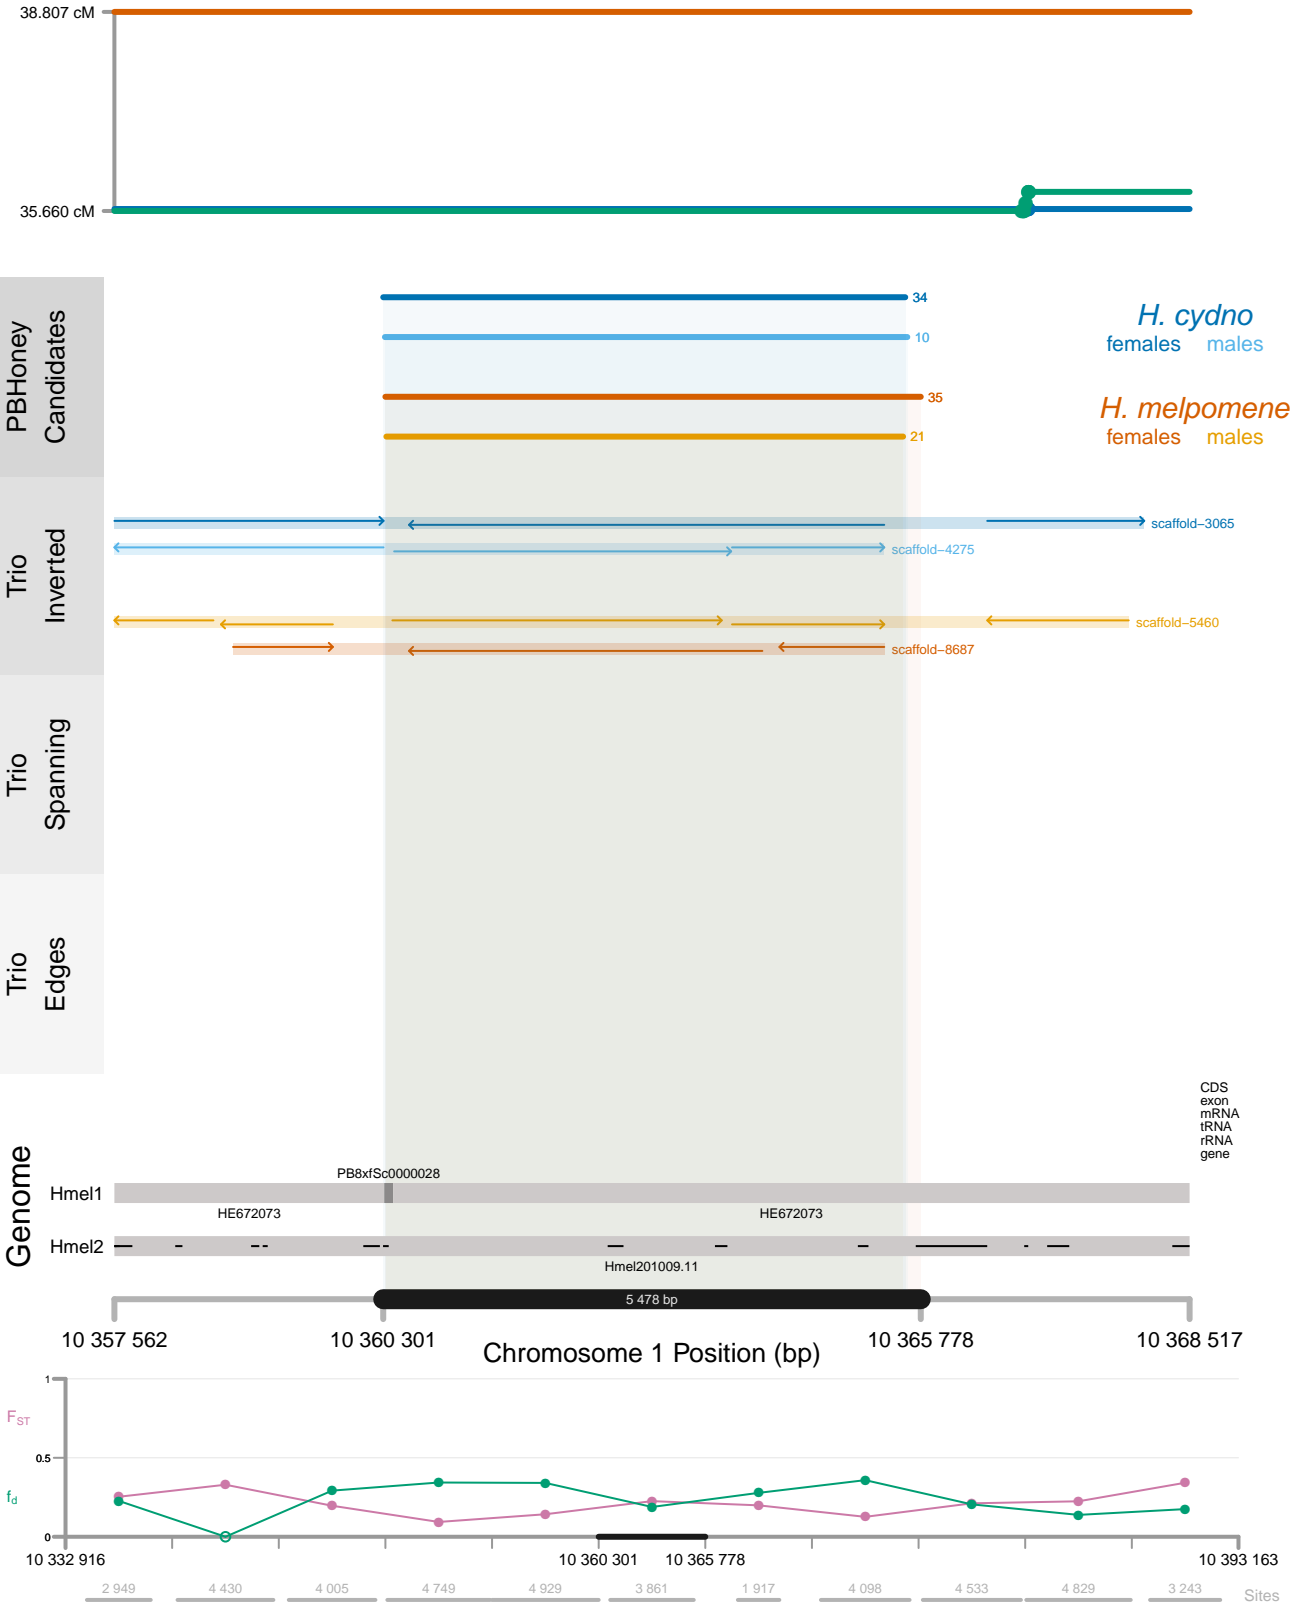



Figure S12.41

Both species

Split reads and trio assembly

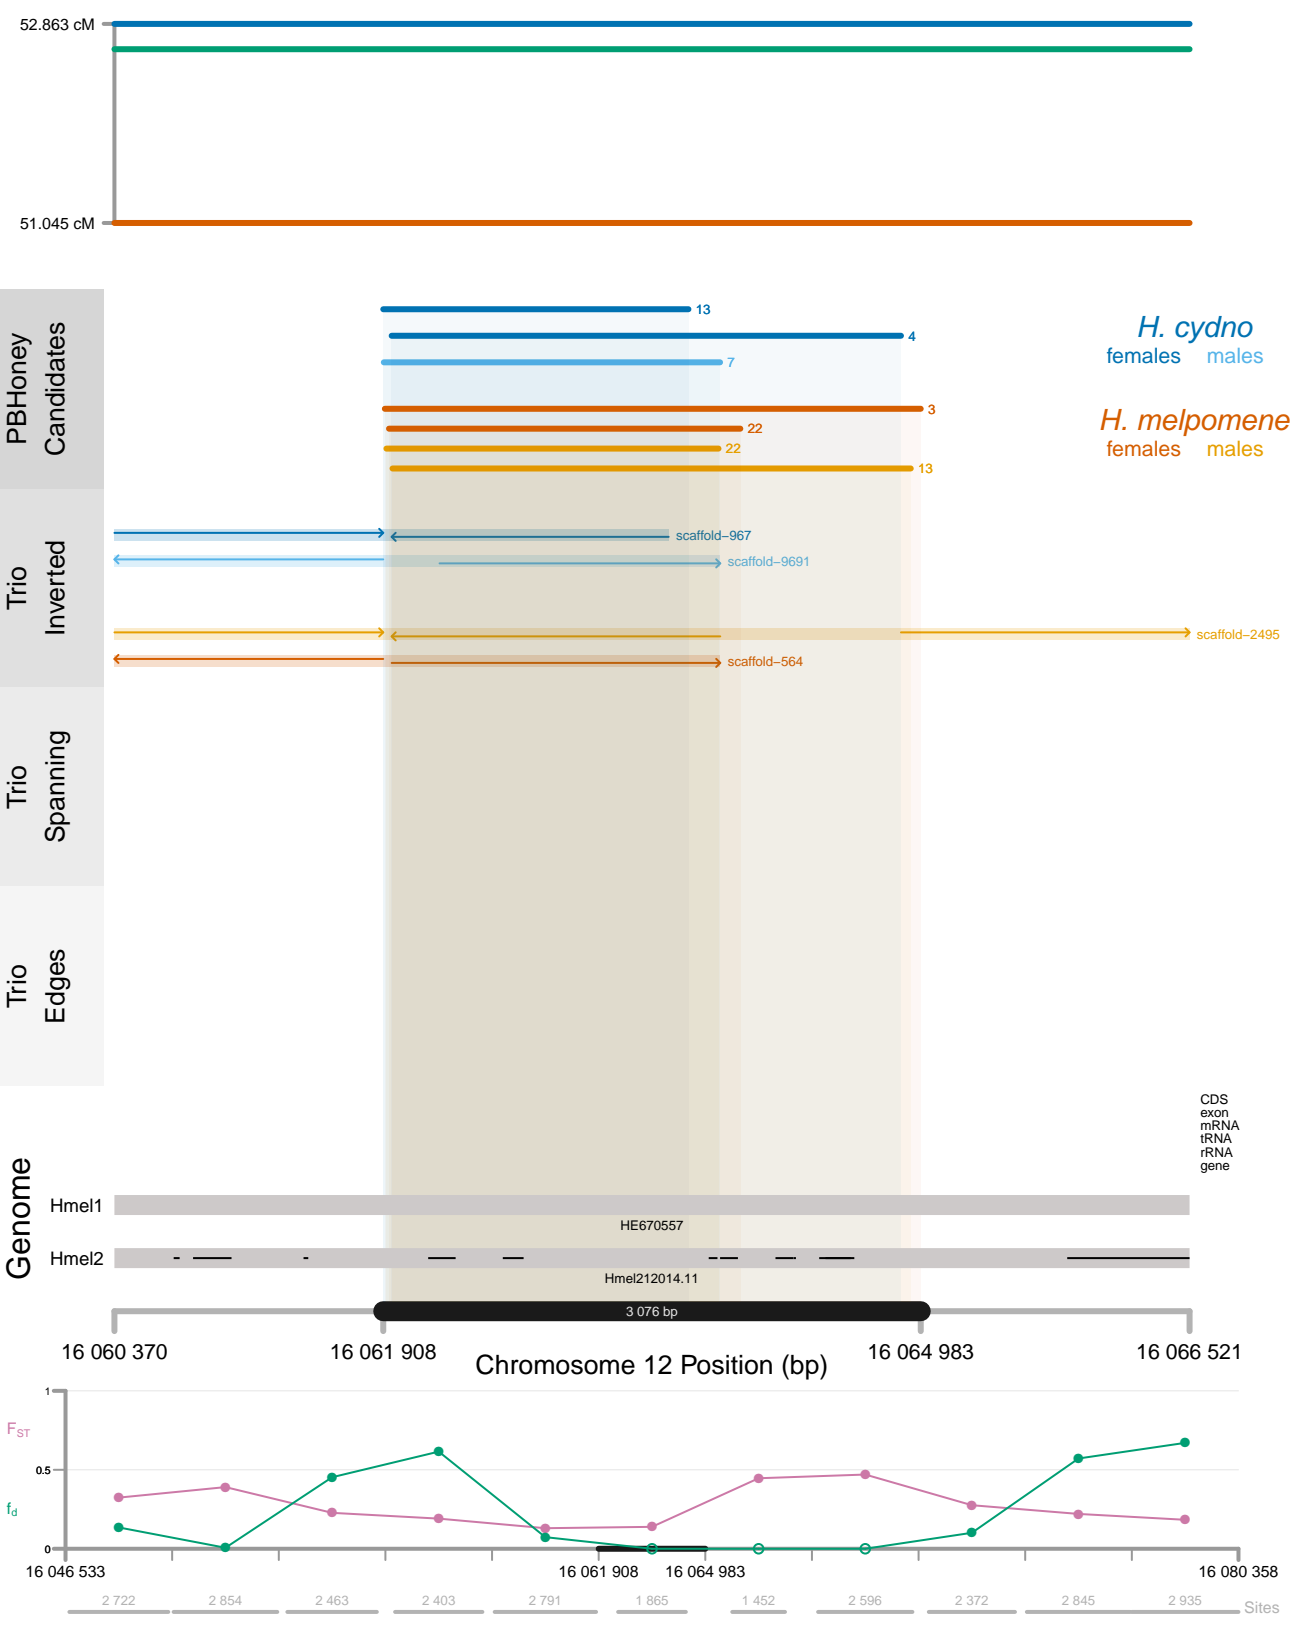

Figure S12.42

Both species

Split reads and trio assembly

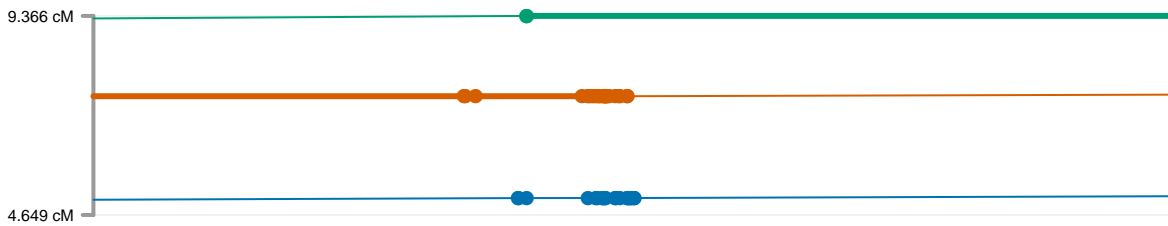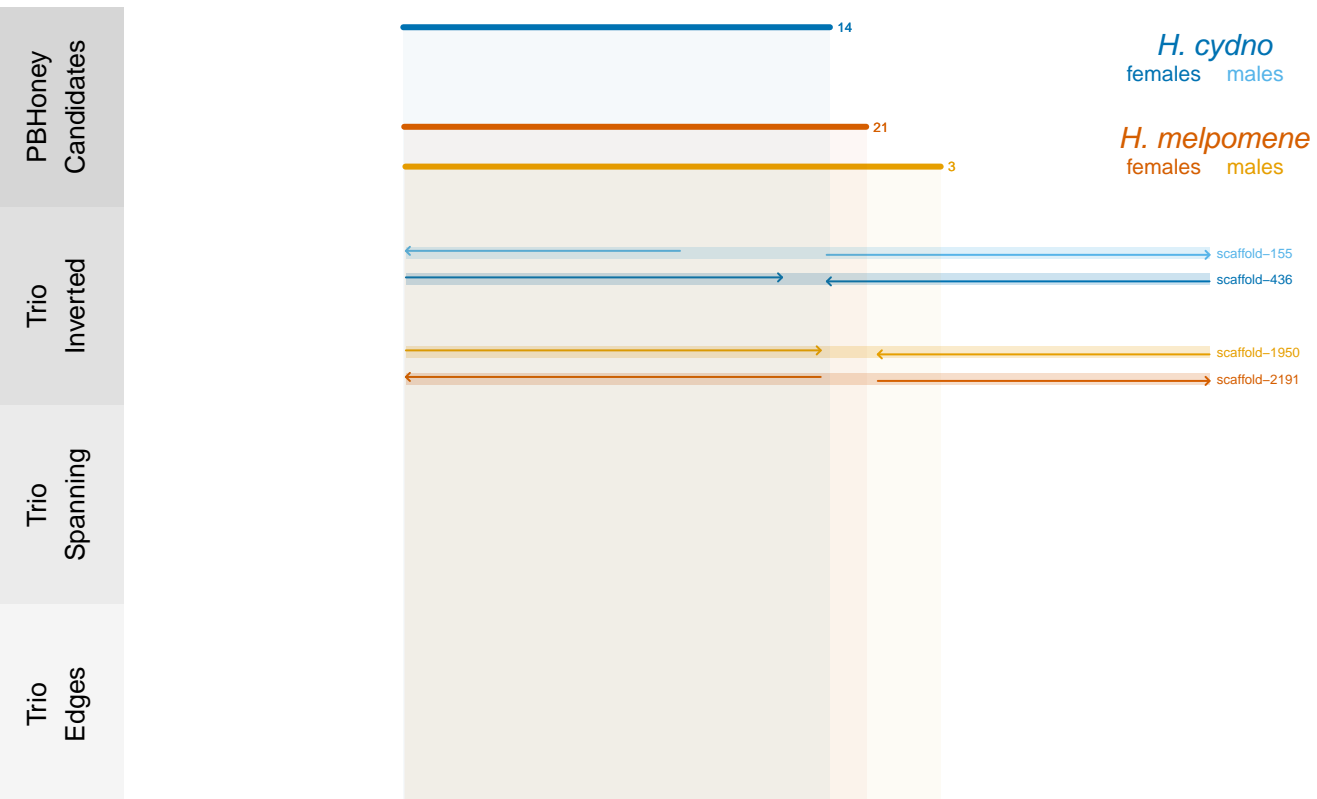

*H. cydno*  
females males

*H. melpomene*  
females males

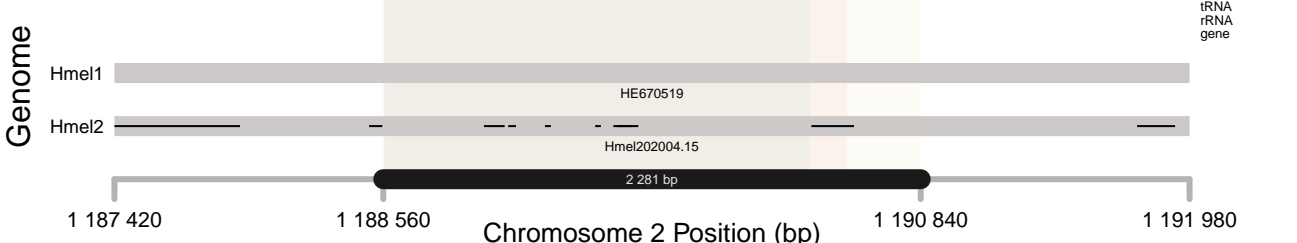

CDS  
exon  
mRNA  
tRNA  
rRNA  
gene

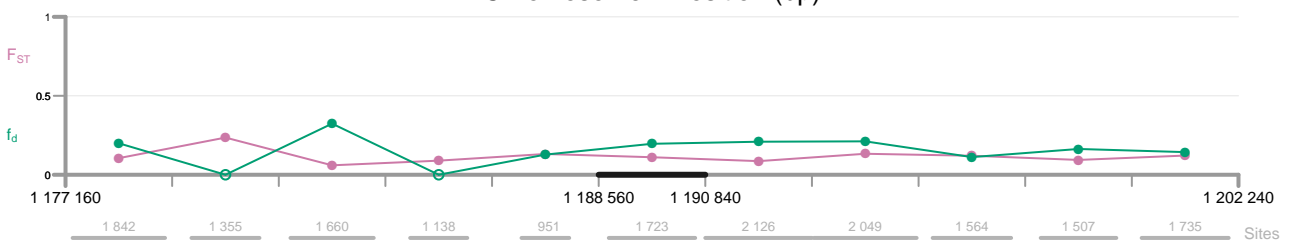

Supplement: Supplementary file [file 083931-12.pdf]
